# Supplementary material for: Systematic Identification of Druggable Epithelial–Stromal Crosstalk Signaling Networks in Ovarian Cancer
Source: PubMed Central journal article supplement — J Natl Cancer Inst. 2018 May 31;111(3):272–82. doi: 10.1093/jnci/djy097 (PMC6410941; doi:10.1093/jnci/djy097), 2018-05-31
Supplement: djy097_supp.pdf [file djy097_supp.pdf]

## **SUPPLEMENTARY METHODS**

**Cell lines and culture conditions.** The human ovarian adenocarcinoma cell lines ALST, OVCA432 and OVCA433 were cultured in Roswell Park Memorial Institute 1640 medium supplemented with 10% fetal bovine serum. All cell lines were tested for mycoplasma contamination and authenticated using a microsatellite panel. NOF151 ovarian fibroblasts and primary CAFs derived from the primary tumor tissues of HGSOC patients were cultured in MCDB 105/199 medium (1:1) supplemented with 10% fetal bovine serum and 1 ng/mL epidermal growth factor.

**Microdissection and microarray analysis of tissue samples.** RNA was extracted from microdissected frozen ovarian tissue samples, which included 6 normal ovarian surface epithelia samples and 8 normal stromal fibroblasts samples from normal ovaries, and tumor epithelial components and stromal CAFs from 70 HGSOC patients. Patient samples were collected from the Ovarian Cancer Repository under protocols approved by The University of Texas MD Anderson Cancer Center Institutional Review Board. All tumor tissue samples were resected from the primary tumor site of previously untreated HGSOC patients with grade 3, stage 3 and 4 diseases. Microdissection was performed on tissue sections fixed in 70% ethanol. The sections were stained with 1% methyl green to visualize histologic features. During laser microdissection, areas of interest in the sections were carefully outlined. Areas with immune cell and blood vessel infiltration were excluded to minimize contamination [6]. 100ng of purified RNA samples were amplified using the Ambion MessageAmp™ Premier RNA amplification kit. Fragmented cRNA was labeled using the Affymetrix GeneChip IVT labeling kit, and hybridized onto GeneChip Human Genome U133 Plus 2.0 microarrays (Affymetrix) according to the manufacturer's protocol. After hybridization, arrays were washed and stained using a GeneChip Fluidics Station 450 and then

scanned using a GeneChip Scanner 3000 7G (Affymetrix). The quality of microarray data was assessed by spike-in controls, perfect match expression and relative log expression during data summarization and normalization. In addition, area under the curve (AUC) was calculated based on a list of tissue specific reference genes designated by the Affymetrix Expression Console software program. Only samples with an ACU greater than the threshold of 0.7 will be further analyzed. In brief, transcriptome data generated from each individual Affymetrix Human Genome U133 Plus 2.0 microarray array was analyzed with the MAS 5.0 algorithm using the Affymetrix Expression Console software program to obtain a report regarding the performance of the array and to identify any obvious problems prior to multichip analysis. The MAS 5.0 algorithm uses the Tukey's biweight estimator to provide a robust mean signal value and the Wilcoxon's rank test to calculate a significance and Detection call for each probe set. Background estimation is provided by a weighted average of the lowest 2% of the feature intensities. Mismatch probes are utilized to adjust the perfect match intensity. Subsequently, using the Genespring GX Bioinformatics Suite (Version 14.9; Agilent Technologies), the quality of the microarray data was further evaluated. To evaluate the efficiency of the cDNA synthesis reaction, with built-in control probesets on the microarray that recognized the 3', middle and 5' regions of the same gene, the ratio of signal intensity for 3' probesets to that from 5' probesets was calculated. In addition, using the software, the hybridization control plots for each of the samples were evaluated for the linearity of the assay, and the quality of the hybridization and washing process based on the signal intensities of spike-in controls prepared in staggered concentrations.

**Hierarchical Clustering and silhouette analysis.** Hierarchical Clustering based on Euclidean distance and Wards linkage was performed for the clustering analysis of hMSCs and microdissected CAF samples. Silhouette analysis was performed to determine the separation distance between the resulting clusters for the interpretation and validation of consistency within clusters of data. The silhouette displays a measure of how close each point in one cluster is to points in the neighboring clusters and thus provides a way to assess parameters like number of clusters. This measure has a range of [-1, 1]. Silhouette coefficients near 1 indicate that the sample is far away from the neighboring clusters. A value of 0 indicates that the sample is on or very close to the decision boundary between two neighboring clusters and negative values indicate that those samples might have been assigned to the wrong cluster. After calculating the average silhouette coefficients across all samples for clustering number  $k=3$  through 10.

**Two computational modules of the CCCExplorer platform used for data analysis.** First, the Activated Transcriptional Factor discovery module was developed on the basis of target genes such as those from transcriptional factor (TF)–target interaction data from the Transcriptional Regulatory Element Database (TRED) [26] and KEGG signaling pathways [27]. In total, 2,618 TF-target interactions, between 192 TFs and 649 target genes, were collected. The computational module deploys the Fisher exact test [28] to identify the activated TFs as follows. Give a TF  $x$ , let  $T\_x\_relative\ expressed$  and  $T\_x\_relative\ silent$  denote expressed and non-expressed target genes of  $x$ , respectively, and  $T\_all\_relative\ expressed$  and  $T\_all\_relative\ silent$  denote expressed and non-expressed target genes of all TFs, respectively. Let  $a = |T\_x\_relative\ expressed|$ ,  $c = |T\_x\_relative\ silent|$ ,  $b = |T\_all\_relative\ expressed| - a$ ,  $d = |T\_all\_relative\ silent| - c$ , and  $n = a + b + c + d$ . Then, the p value of the Fisher test was calculated

as:  $p = \frac{(a+b)! (c+d)! (a+c)! (b+d)!}{a! b! c! d!}$ . Finally, activated TFs were identified with a p value threshold of 0.05.

Second, the Activated Ligand-Receptor interaction discovery module archived the ligand-receptor interaction data from KEGG and the Database of Ligand-Receptor Partners (DLRP) [29], and collected proteins that were annotated as “extracellular” or “secreted” in Human Protein Reference Database (HPRD) [30] as ligands, with the corresponding receptors of these ligands were identified by using the STRING [31] database. In total, 1,419 ligand-receptor interactions, between 431 ligands and 316 receptors, were collected in the Activated Ligand-Receptor interaction discovery module database. Consequently, the activated ligand-receptor interactions were identified by the following calculations: (1) determination of whether the ligand genes are upregulated and the corresponding receptor genes are expressed, (2) determination of whether the receptor genes are upregulated and the corresponding ligand genes are expressed, or (3) crosstalk signaling reconstruction by linking activated ligand–receptor–TF–target gene on the KEGG signaling pathways. In total, 256 KEGG signaling pathways were obtained from the KEGG database, and then the shortest path analysis in the “igraph” package in R was employed for each individual KEGG signaling pathway to reconstruct the crosstalk signaling pathways by linking the activated ligand-receptor pairs to the activated TFs and their expressed target genes. To predict potentially activated signaling pathways, we used Fisher Exact Test to evaluate the probability that one pathway was enriched in differentially expressed genes. Pathways that had p-values smaller than 0.05 indicated that there was a 95% probability that the proportion of differentially expressed genes in these pathways was higher than randomly selected gene sets. Thus, these pathways were not likely to be over-represented by chance.

**Robustness assessment of CCCExplorer.** Three approaches were used to assess the robustness of the CCCExplorer software program in predicting activation of crosstalk signaling pathways mediated by differentially expressed secretory ligands from cancer cells and in predicting pathways mediated by differentially expressed receptors in CAFs. For each approach, one thousand permutation tests were performed. First, to evaluate if CCCExplorer predicts activated crosstalk signaling pathways with statistical significance based on randomly generated data sets, input data sets of secretory ligands, receptors, transcription factors and differentially expressed genes were generated by randomly selecting candidates among all known protein coding genes represented by the Affymatrix Human Genome U133 Plus 2.0 microarray. The number of genes in each list is the same as our data set generated by comparing the transcriptome profiles between patients with CAF-C and CAF-N gene signatures. Second, to evaluate the effects of feeding unimportant genes to CCCExplorer on crosstalk signaling pathway prediction, randomly selected genes were added to each of our list of ligands, receptors, transcription factors, and differentially expressed genes. Ten percent of genes in the resulting lists were selected randomly. Finally, to evaluate the impact of deleting important genes from the data sets on signaling pathway prediction by CCCExplorer, ten percent of genes were randomly selected and removed from each of the list of ligands, receptors, transcription factors and differentially expressed genes.

**qRT-PCR analysis.** The relative expression level of each target gene was determined using the  $2^{-\Delta\Delta CT}$  method [32]. Predesigned human MFAP5, VCAN, COMP, VDR and cyclophilin A TaqMan gene expression assays (Life Technologies) were used in qRT-PCR analyses.

**Co-culture of ovarian cancer cells and fibroblasts.** To evaluate the roles of Smad signaling pathway activation in CAFs on the motility of cancer cells, co-culture of the two cell types were performed using Boyden chambers in a 12-well plate:  $1 \times 10^5$  ovarian cancer cells were seeded onto each 8- $\mu\text{m}$  porous cell culture insert (BD Biosciences). In the lower chamber,  $2 \times 10^5$  fibroblasts were plated. After a 4-hour incubation period, cancer cells were stained with calcein AM (Life Technologies). Non-migrated cells in the cell culture inserts were removed, and cancer cells that migrated through the pores were quantified by obtaining images of the stained cells in nine random fields of view per membrane using fluorescent microscopy and the Image-Pro Plus software program (version 7.0).

**Western blot analysis.** Protein lysates from CAFs were separated on NuPAGE gels (Life Technologies) under denaturing conditions and transferred onto nitrocellulose membranes using the iBlot Western blotting system (Life Technologies). Anti-human Smad3 and phospho-Smad3 antibodies were purchased from Cell Signaling Technology. Protein bands were detected using an Odyssey infrared imaging system (LI-COR Biosciences). Protein expression levels normalized to the corresponding GAPDH controls were calculated on the basis of the band intensity values measured using the ImageJ software program (National Institutes of Health).

**Repositioned drug identification.** First, the names of FDA-approved drugs were obtained from the DrugMap Central database [33, 34] which included 2,202 FDA-approved drugs (1,991 FDA-approved small-molecule drugs and 211 FDA-approved protein/peptide drugs) from DrugBank. Then, drug prediction based on the Smad signaling gene signature was performed by extracting Smad signaling pathway information from the KEGG signaling pathway database and then using 23 upregulated genes

and nine downregulated genes modulated by Smad signaling in CAFs to rank drug candidates via the “query” function of the LINCScloud Web site (<https://clue.io/>). GSEA scores [35, 36] for the upregulated and downregulated gene sets were calculated for all LINCS compounds in the different cell lines. GSEA considered experiments with genome-wide expression profiles from samples belonging to two classes, labeled 1 or 2. Genes were ranked based on the correlation between their expression and the class distinction by using any suitable metric. Given an *a priori* defined set of genes  $S$ , the goal of GSEA was to determine whether the members of  $S$  were randomly distributed throughout  $L$  or primarily found at the top or bottom. In our drug repositioning module,  $S$  denoted up/down regulated genes modulated by Smad signaling in CAFs.  $L$  denoted the list of genes in the drug treatment experiments from LINCScloud ranked by their fold changes in gene expression before/after treatment. We calculated an enrichment score ( $ES$ ) that reflected the degree to which a set  $S$  is overrepresented at the extremes (top or bottom) of the entire ranked list  $L$ . The score was calculated by walking down the list  $L$ , increasing a running-sum statistic when we encountered a gene in  $S$  and decreasing it when we encountered genes not in  $S$ . The magnitude of the increment depended on the correlation of the gene with the phenotype. The enrichment score was the maximum deviation from zero encountered in the random walk; it corresponded to a weighted Kolmogorov–Smirnov-like statistic. The  $ES$  scores were then normalized to  $[-100, 100]$  averaged across all cell lines with  $[0,100]$  meaning positive correlation and  $[-100,0]$  meaning reverse correlation between drug signature and Smad signaling signature. The mean GSEA scores of nine cell lines (PC3, VCAP, A375, A549, HA1E, HCC515, HT29, MCF7 and HEPG2) were used to select drugs potentially effective for Smad signaling suppression. Finally, noisy drug filtering was performed by drug clustering analysis. Since the prediction results from LINCScloud could be noisy, a drug clustering approach was developed to refine the drug prediction

results. Specifically, the drug-drug similarity data were collected from an independent database, STITCH [37]. The top predicted drugs were then clustered using the affinity propagation clustering approach [38]. The drug clusters with fewer drugs were removed as noise, while bigger drug clusters were kept as potential drug candidates. Representative drugs were selected from individual drug clusters for further experimental evaluation.

**Effects of calcitriol treatment on *in vivo* tumor growth and animal survival.** To evaluate the effects of calcitriol treatment on ovarian tumor progression *in vivo*,  $2 \times 10^6$  OVCA432 human ovarian cancer cells and  $2 \times 10^6$  primary ovarian CAFs were mixed, resuspended in sterile PBS, and co-injected subcutaneously into female nude mice at the age of 6 weeks over both the left and right flank. Tumors were allowed to develop for 5 days prior to calcitriol treatment and a total of 20 subcutaneous tumor nodules were established in 10 mice. On day 5, animals were randomized, and the control animal group received intratumoral injection of sterile PBS, while the treatment group received calcitriol treatment at the dosage of 60  $\mu\text{g}/\text{kg}$ . All animals were treated twice weekly for a total of 3 weeks. At the experimental endpoint, small animal imaging was performed to quantify the luciferase signal given by labeled ovarian cancer cells. Subsequently, all mice were euthanized and subcutaneous tumor nodules were harvested, weighed and fixed in formalin for further histological analysis. On the other hand, to investigate the effects of calcitriol treatment on the survival of ovarian tumor-bearing transgenic animals, the Amhr2-Cre-driven Dicer/PTEN double-knockout genetically engineered mouse model was used. At the age of 4 months, female transgenic animals were treated with either 60  $\mu\text{g}/\text{kg}$  of calcitriol (N=9) or sterile PBS (N=11) twice per week via intraperitoneal injections until the animals became moribund. The survival duration for each animal was recorded and Kaplan-Meier survival analysis was



performed. Animal studies were performed under the protocol approved by the MD Anderson Institutional Animal Use and Care Committee (IACUC).

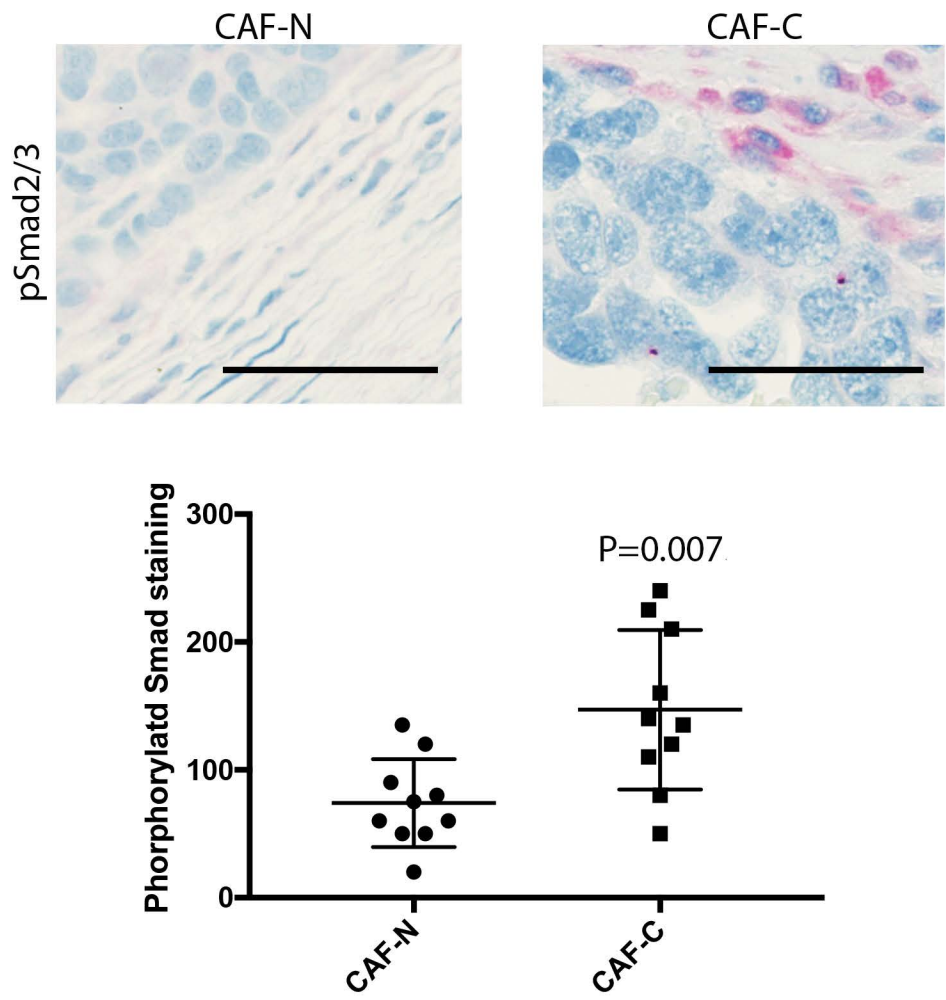

**Supplementary Figure 1.** Immunostaining of phosphorylated Smad2/3 were performed on FFPE tissue sections from HGSOc patients with CAF-C and CAF-N gene expression subtypes. (mean  $\pm$  SD; N=10 per group; two-tailed Mann-Whitney U test; bar=50  $\mu$ m).

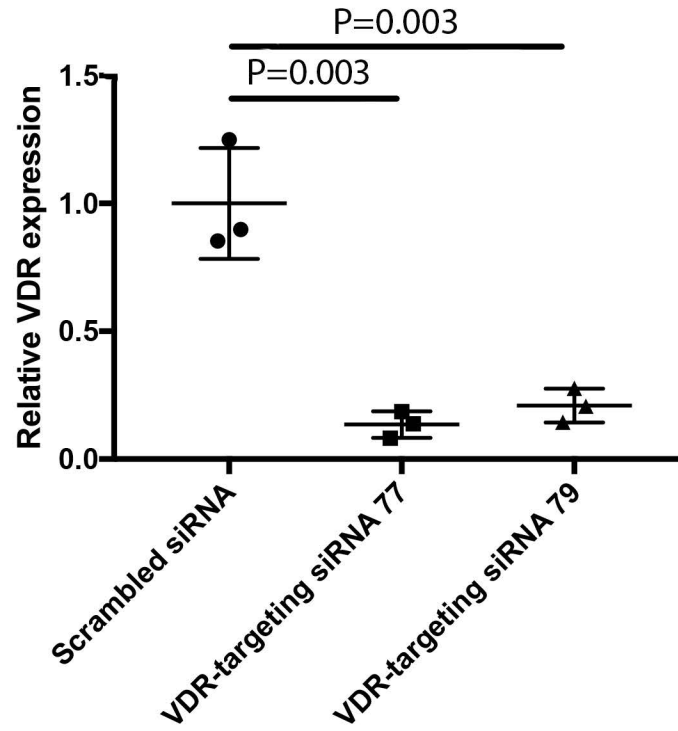

**Supplementary Figure 2.** Silencing of VDR expression in CAF863389 by VDR-targeting siRNAs was validated by qRT-PCR. (mean  $\pm$  SD of three independent experiments; two-tailed Student t-test)

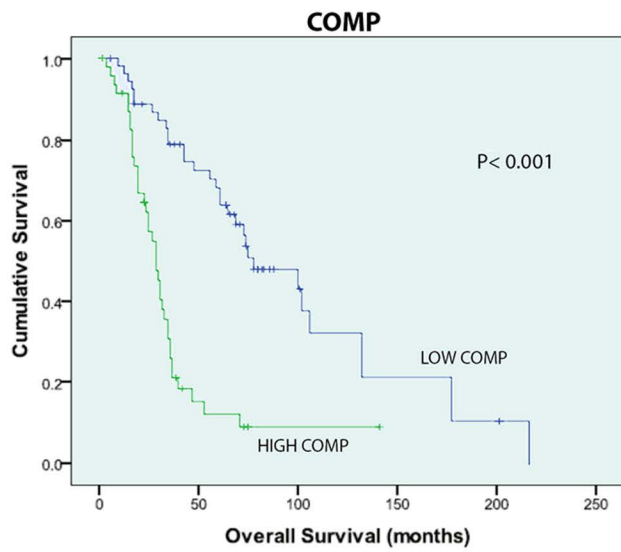

Number at risk

|      |    |    |   |   |   |   |
|------|----|----|---|---|---|---|
| Low  | 54 | 34 | 7 | 4 | 1 | 0 |
| High | 47 | 5  | 1 | 0 | 0 | 0 |

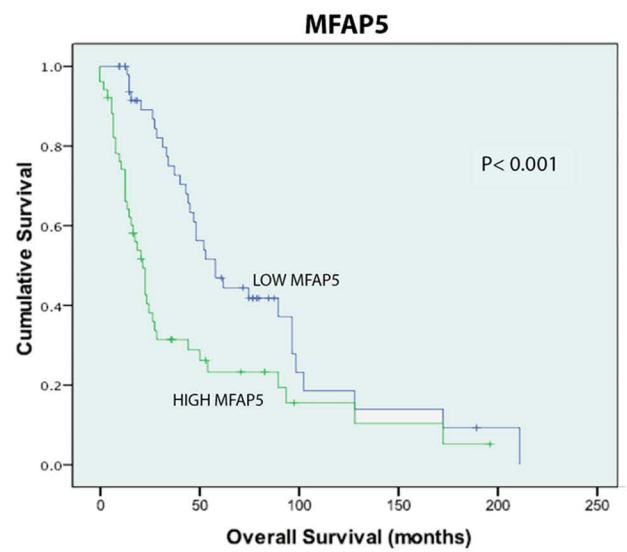

Number at risk

|      |    |    |   |   |   |   |
|------|----|----|---|---|---|---|
| Low  | 51 | 24 | 5 | 3 | 1 | 0 |
| High | 51 | 11 | 3 | 2 | 0 | 0 |

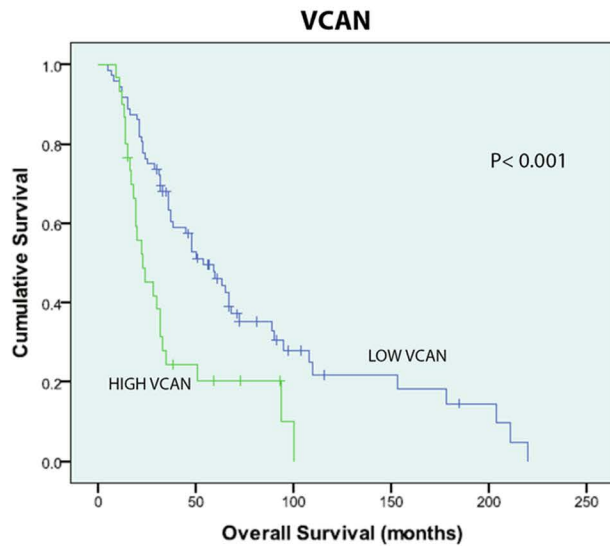

Number at risk

|      |    |    |    |   |   |   |
|------|----|----|----|---|---|---|
| Low  | 72 | 39 | 10 | 6 | 3 | 0 |
| High | 30 | 6  | 0  | 0 | 0 | 0 |

**Supplementary Figure 3.** The prognostic significance of the expression levels of TGF- $\beta$ /Smad signaling downstream genes COMP, MFAP5, and VCAN in CAFs was evaluated by Kaplan-Meier analysis and log-rank tests

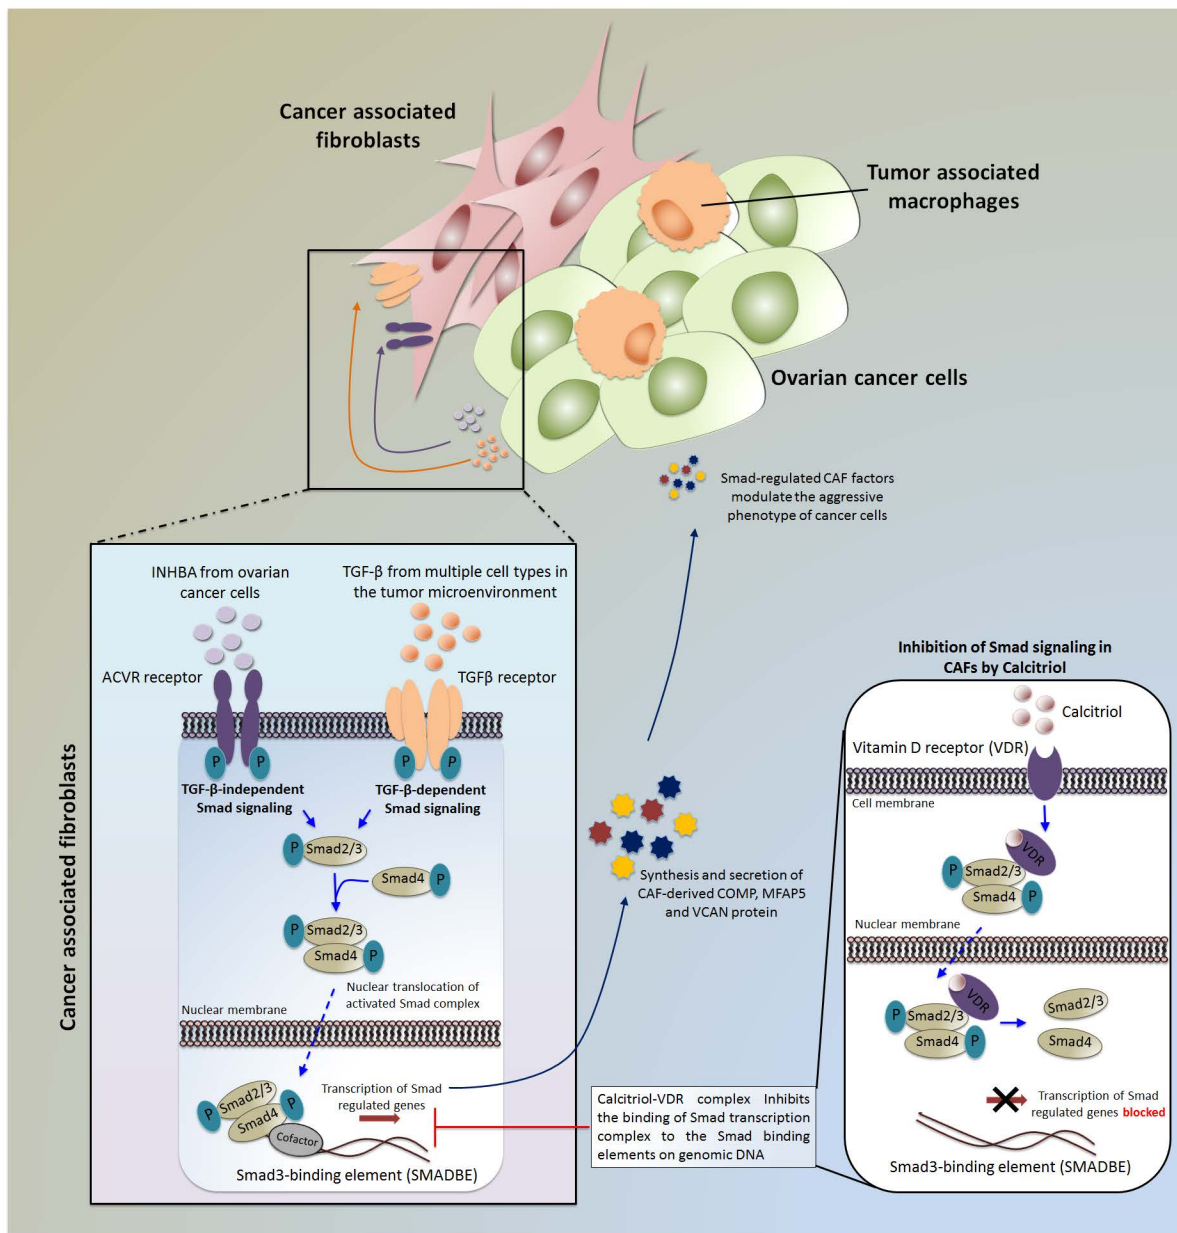

**Supplementary Figure 4.** A summary figure showing the activation of TGF- $\beta$ -dependent and TGF- $\beta$ -independent Smad signaling in ovarian CAFs. Cancer cell-derived INHBA and TGF- $\beta$  from the ovarian tumor microenvironment promote the formation of the Smad transcription complex and the subsequent transcription of Smad-regulated genes in CAFs. Secretion of stromal factors including COMP, MFAP5 and VCAN by CAFs could promote the aggressive phenotypes of ovarian cancer cells. Smad signaling activation in CAFs can be attenuated by calcitriol. Calcitriol-VDR complex inhibits the binding of Smad transcription complex to genomic DNA and Smad protein will be dephosphorylated.

**Supplementary Table 1.** Results of silhouette analysis on hierarchical clustering of transcriptome profiles.

| <b>Number of clusters</b> | <b>Silhouette coefficient<br/>(k means clustering)</b> | <b>Silhouette coefficient<br/>(Hierarchical clustering with Wards linkage)</b> |
|---------------------------|--------------------------------------------------------|--------------------------------------------------------------------------------|
| 3                         | 0.520779                                               | 0.506461                                                                       |
| 4                         | 0.440330                                               | 0.459211                                                                       |
| 5                         | 0.212553                                               | 0.327744                                                                       |
| 6                         | 0.288765                                               | 0.303304                                                                       |
| 7                         | 0.253932                                               | 0.248601                                                                       |
| 8                         | 0.271511                                               | 0.231292                                                                       |
| 9                         | 0.276265                                               | 0.213131                                                                       |
| 10                        | 0.257753                                               | 0.216640                                                                       |

**Supplementary Table 2.** Differentially expressed genes in CAF-C when compared with CAF-N**Upregulated genes (Fold change>5; Two-tailed Moderated *t*-test with Benjamini-Hochberg multiple testing adjusted  $P<0.05$ )**

| Gene symbol | Probe set ID | Fold change | P-value  |
|-------------|--------------|-------------|----------|
| COL6A2      | 209156_s_at  | 23.59       | 1.86E-22 |
| VIM         | 201426_s_at  | 19.35       | 2.52E-24 |
| DCN         | 211896_s_at  | 17.73       | 2.03E-17 |
| PPIB        | 200967_at    | 17.55       | 4.09E-25 |
| RAN         | 200750_s_at  | 16.20       | 1.97E-23 |
| NACA        | 208635_x_at  | 15.75       | 2.32E-20 |
| TAGLN       | 205547_s_at  | 15.68       | 1.41E-19 |
| FTL         | 213187_x_at  | 15.43       | 1.03E-20 |
| B2M         | 216231_s_at  | 15.12       | 1.11E-20 |
| OAZ1        | 215952_s_at  | 15.02       | 4.07E-25 |
| RPS16       | 201258_at    | 14.85       | 5.11E-19 |
| HNRNPA2B1   | 205292_s_at  | 14.59       | 4.43E-19 |
| COL3A1      | 201852_x_at  | 14.56       | 1.83E-13 |
| GNAS        | 200780_x_at  | 14.54       | 2.95E-22 |
| RPLP0       | 214167_s_at  | 14.14       | 2.98E-20 |
| PSMB1       | 200876_s_at  | 13.86       | 5.54E-25 |
| GNB2L1      | 200651_at    | 13.85       | 1.36E-22 |
| FTH1        | 200748_s_at  | 13.69       | 4.36E-23 |
| EEF2        | 204102_s_at  | 13.66       | 7.30E-21 |
| COL1A1      | 202310_s_at  | 13.51       | 1.82E-17 |
| RNU86       | 211666_x_at  | 13.39       | 3.00E-21 |
| PRDX5       | 1560587_s_at | 13.13       | 6.06E-22 |
| LAMP1       | 201552_at    | 13.06       | 3.00E-18 |
| SLC25A6     | 212085_at    | 12.88       | 2.77E-18 |
| RPL8        | 200936_at    | 12.88       | 2.31E-21 |
| TPT1        | 216520_s_at  | 12.77       | 3.54E-18 |
| RPS9        | 217747_s_at  | 12.66       | 1.57E-20 |
| ACTG1       | 211995_x_at  | 12.60       | 1.31E-23 |
| ARPC2       | 208679_s_at  | 12.44       | 1.71E-25 |
| HNRNPM      | 1555844_s_at | 12.27       | 1.84E-19 |
| HLA-B       | 209140_x_at  | 12.18       | 4.48E-18 |
| ACTR2       | 200728_at    | 11.89       | 6.90E-23 |
| ATP5C1      | 213366_x_at  | 11.75       | 3.85E-21 |
| ANXA1       | 201012_at    | 11.69       | 1.76E-21 |
| HSP90AB1    | 200064_at    | 11.68       | 1.34E-23 |
| SSBP1       | 202591_s_at  | 11.67       | 2.91E-23 |

|          |             |       |          |
|----------|-------------|-------|----------|
| RPL10A   | 200036_s_at | 11.63 | 6.88E-20 |
| RPL15    | 221476_s_at | 11.51 | 4.03E-20 |
| P4HB     | 200654_at   | 11.46 | 7.90E-25 |
| LTBP3    | 219922_s_at | 11.39 | 4.06E-19 |
| HSPA8    | 208687_x_at | 11.39 | 1.99E-24 |
| DDX5     | 200033_at   | 11.32 | 3.20E-18 |
| SPCS1    | 217927_at   | 11.32 | 1.14E-22 |
| RPS3     | 208692_at   | 11.27 | 1.02E-20 |
| CCNI     | 208655_at   | 11.19 | 1.44E-19 |
| EIF3C    | 210949_s_at | 11.07 | 1.79E-24 |
| KLF6     | 224606_at   | 11.07 | 5.26E-18 |
| RPL4     | 211710_x_at | 11.01 | 5.22E-21 |
| CCT3     | 200910_at   | 10.98 | 2.80E-22 |
| SLC25A3  | 200030_s_at | 10.92 | 2.20E-25 |
| RPL11    | 200010_at   | 10.80 | 4.85E-23 |
| HNRNPDL  | 209067_s_at | 10.80 | 1.52E-23 |
| SPARC    | 200665_s_at | 10.79 | 1.32E-12 |
| CALM1    | 200655_s_at | 10.74 | 9.83E-21 |
| RPL29    | 200823_x_at | 10.72 | 2.39E-20 |
| NAP1L1   | 213864_s_at | 10.71 | 6.34E-20 |
| ATP5O    | 200818_at   | 10.68 | 8.10E-23 |
| HLA-C    | 214459_x_at | 10.67 | 4.27E-19 |
| RPL6     | 200034_s_at | 10.58 | 4.31E-21 |
| BTF3     | 208517_x_at | 10.56 | 9.09E-23 |
| RPL28    | 200003_s_at | 10.52 | 9.57E-18 |
| GAPDH    | 213453_x_at | 10.51 | 7.88E-25 |
| GORASP2  | 207812_s_at | 10.50 | 7.12E-24 |
| PALLD    | 200907_s_at | 10.48 | 2.12E-21 |
| H2AFZ    | 200853_at   | 10.41 | 5.48E-21 |
| ATP5F1   | 211755_s_at | 10.40 | 1.67E-21 |
| HNRNPD   | 209330_s_at | 10.28 | 3.70E-19 |
| MMADHC   | 217883_at   | 10.27 | 1.12E-18 |
| PABPC1   | 215157_x_at | 10.23 | 4.56E-24 |
| EEF1D    | 203113_s_at | 10.22 | 5.09E-18 |
| HSP90B1  | 200598_s_at | 10.14 | 2.42E-24 |
| PPP2CB   | 201375_s_at | 10.08 | 8.62E-17 |
| SOX4     | 201417_at   | 10.08 | 3.55E-15 |
| CNBP     | 206158_s_at | 10.02 | 9.56E-22 |
| RPLP2    | 200909_s_at | 10.01 | 2.59E-21 |
| HSP90AA1 | 210211_s_at | 9.98  | 6.49E-22 |
| YBX1     | 208628_s_at | 9.87  | 9.65E-23 |



|           |              |      |          |
|-----------|--------------|------|----------|
| RHOA      | 200059_s_at  | 9.81 | 4.07E-27 |
| C14orf166 | 217768_at    | 9.80 | 1.39E-20 |
| RPL14     | 200074_s_at  | 9.79 | 5.65E-22 |
| HSPB1     | 201841_s_at  | 9.73 | 4.45E-24 |
| RPL35     | 200002_at    | 9.72 | 4.83E-19 |
| TIMP1     | 201666_at    | 9.67 | 3.38E-19 |
| CTSB      | 200838_at    | 9.65 | 2.74E-21 |
| AP2M1     | 200613_at    | 9.59 | 1.95E-23 |
| YWHAQ     | 200693_at    | 9.58 | 5.15E-27 |
| SLIRP     | 221434_s_at  | 9.55 | 7.64E-23 |
| LGALS1    | 201105_at    | 9.49 | 7.51E-24 |
| PGK1      | 200738_s_at  | 9.47 | 6.34E-20 |
| MRPL3     | 208787_at    | 9.45 | 1.70E-15 |
| PNN       | 1567214_a_at | 9.43 | 1.05E-16 |
| RPL18     | 200022_at    | 9.41 | 2.60E-20 |
| ATP5A1    | 213738_s_at  | 9.37 | 1.02E-20 |
| GPX1      | 200736_s_at  | 9.37 | 1.71E-20 |
| SH3BGRL   | 201312_s_at  | 9.36 | 4.01E-15 |
| RPL5      | 200937_s_at  | 9.34 | 1.27E-19 |
| PSMA2     | 201317_s_at  | 9.32 | 2.58E-19 |
| EIF4A1    | 211787_s_at  | 9.30 | 2.64E-25 |
| COL4A1    | 211980_at    | 9.24 | 1.18E-12 |
| LAPTM4B   | 208029_s_at  | 9.23 | 2.36E-15 |
| CTGF      | 209101_at    | 9.22 | 3.72E-16 |
| BCLAF1    | 201084_s_at  | 9.17 | 5.00E-18 |
| COL5A2    | 221730_at    | 9.16 | 9.18E-12 |
| RPL13     | 212191_x_at  | 9.15 | 6.01E-18 |
| YWHAZ     | 200640_at    | 9.15 | 1.32E-24 |
| CSDE1     | 222975_s_at  | 9.12 | 1.14E-25 |
| MDH2      | 209036_s_at  | 9.10 | 3.38E-24 |
| ACTR3     | 200996_at    | 9.05 | 7.55E-19 |
| GALNT1    | 1568618_a_at | 9.02 | 2.91E-17 |
| MTDH      | 212251_at    | 8.99 | 6.08E-25 |
| OSTC      | 223001_at    | 8.99 | 8.30E-22 |
| MATR3     | 200626_s_at  | 8.98 | 1.25E-19 |
| RPL36AL   | 207585_s_at  | 8.89 | 3.48E-20 |
| UXS1      | 225583_at    | 8.88 | 5.13E-23 |
| PTPLAD1   | 222404_x_at  | 8.85 | 8.54E-21 |
| SERBP1    | 209669_s_at  | 8.84 | 4.27E-19 |
| ITM2B     | 217732_s_at  | 8.83 | 1.64E-19 |
| PRDX4     | 201923_at    | 8.82 | 6.49E-18 |

|          |             |      |          |
|----------|-------------|------|----------|
| UBC      | 211296_x_at | 8.76 | 3.65E-23 |
| RAC1     | 208640_at   | 8.76 | 2.68E-19 |
| CYR61    | 201289_at   | 8.74 | 4.94E-14 |
| CKAP4    | 200998_s_at | 8.73 | 1.14E-25 |
| TPM2     | 204083_s_at | 8.73 | 4.50E-18 |
| GTF3A    | 215091_s_at | 8.69 | 3.49E-19 |
| SERINC1  | 208671_at   | 8.67 | 4.79E-20 |
| TTC3     | 208662_s_at | 8.66 | 8.08E-23 |
| CCT8     | 200873_s_at | 8.60 | 1.66E-23 |
| SPATS2L  | 222154_s_at | 8.58 | 9.63E-19 |
| TPI1     | 213011_s_at | 8.57 | 8.03E-28 |
| CLTA     | 216295_s_at | 8.56 | 3.34E-22 |
| RNASEK   | 224573_at   | 8.56 | 6.91E-27 |
| NGRN     | 217722_s_at | 8.55 | 2.69E-20 |
| EIF3H    | 201592_at   | 8.54 | 4.25E-20 |
| UBE2Q2   | 224747_at   | 8.53 | 1.67E-17 |
| NBR1     | 201384_s_at | 8.50 | 3.42E-20 |
| SOD1     | 200642_at   | 8.45 | 3.44E-27 |
| CCT2     | 201947_s_at | 8.44 | 6.09E-23 |
| RPL10    | 200725_x_at | 8.43 | 1.80E-20 |
| MYL9     | 201058_s_at | 8.42 | 4.80E-22 |
| UFC1     | 217797_at   | 8.42 | 2.40E-22 |
| IMPDH2   | 201892_s_at | 8.40 | 2.23E-18 |
| CAPN2    | 208683_at   | 8.34 | 2.01E-20 |
| EMC7     | 217898_at   | 8.33 | 2.32E-27 |
| IFITM2   | 201315_x_at | 8.31 | 1.03E-22 |
| FOS      | 209189_at   | 8.30 | 3.10E-09 |
| PDIA3    | 208612_at   | 8.17 | 2.44E-26 |
| RTN4     | 210968_s_at | 8.16 | 1.19E-20 |
| GLT8D1   | 218147_s_at | 8.14 | 6.92E-23 |
| B4GALT5  | 221485_at   | 8.14 | 1.52E-20 |
| UBE2H    | 222420_s_at | 8.09 | 9.29E-22 |
| LGALS3BP | 200923_at   | 8.09 | 3.24E-20 |
| MSRB2    | 218773_s_at | 8.07 | 3.54E-25 |
| LDHB     | 213564_x_at | 8.02 | 1.04E-19 |
| PERP     | 222392_x_at | 8.02 | 3.72E-17 |
| EIF3D    | 200005_at   | 8.00 | 1.98E-22 |
| TUBB6    | 209191_at   | 8.00 | 1.85E-28 |
| EEF1A1   | 204892_x_at | 7.99 | 1.36E-20 |
| HTRA1    | 201185_at   | 7.98 | 1.22E-18 |
| CLU      | 208792_s_at | 7.98 | 1.24E-10 |

|                 |             |      |          |
|-----------------|-------------|------|----------|
| STAU1           | 208948_s_at | 7.97 | 3.03E-23 |
| GABARAP         | 200645_at   | 7.97 | 6.73E-27 |
| EIF1            | 202021_x_at | 7.96 | 1.37E-24 |
| COL12A1         | 225664_at   | 7.94 | 4.94E-10 |
| TIMP2           | 224560_at   | 7.94 | 3.81E-18 |
| MYL6            | 212082_s_at | 7.93 | 9.26E-20 |
| KDEL2           | 200699_at   | 7.93 | 6.69E-23 |
| TUBA1B          | 212639_x_at | 7.92 | 1.14E-25 |
| IGFBP7          | 201162_at   | 7.90 | 8.92E-22 |
| CNPY2           | 202857_at   | 7.90 | 3.43E-22 |
| SET             | 40189_at    | 7.89 | 3.50E-20 |
| PARK7           | 200006_at   | 7.88 | 6.28E-21 |
| RPS19           | 213414_s_at | 7.88 | 2.59E-21 |
| HDAC1           | 201209_at   | 7.88 | 2.22E-21 |
| COX2            | 1553569_at  | 7.86 | 6.25E-18 |
| PAPOLA          | 222035_s_at | 7.86 | 6.95E-21 |
| RPL13A          | 210646_x_at | 7.83 | 9.11E-20 |
| LRRC47          | 212904_at   | 7.83 | 4.19E-23 |
| PCBP2           | 204031_s_at | 7.80 | 7.84E-27 |
| YWHAB           | 208743_s_at | 7.79 | 4.11E-26 |
| PRDX2           | 39729_at    | 7.79 | 2.11E-18 |
| SCARB2          | 224983_at   | 7.77 | 3.17E-24 |
| RPS8            | 200858_s_at | 7.77 | 8.62E-20 |
| LDHA            | 200650_s_at | 7.77 | 1.69E-21 |
| EIF4G2          | 200004_at   | 7.76 | 2.91E-19 |
| RPS14           | 208645_s_at | 7.73 | 3.51E-20 |
| EDF1            | 209059_s_at | 7.73 | 1.61E-22 |
| PSMA4           | 203396_at   | 7.72 | 2.00E-23 |
| CUL3            | 201371_s_at | 7.72 | 5.87E-23 |
| PTGES3          | 200627_at   | 7.69 | 5.89E-24 |
| ATP6V1G2        | 200041_s_at | 7.68 | 5.07E-20 |
| HSPA1A///HSPA1B | 200800_s_at | 7.68 | 1.04E-17 |
| RPS7            | 200082_s_at | 7.67 | 5.98E-28 |
| DAD1            | 200046_at   | 7.66 | 2.82E-23 |
| UQCRB           | 205849_s_at | 7.65 | 5.16E-21 |
| ATP5G3          | 207508_at   | 7.63 | 1.53E-24 |
| ATRAID          | 219329_s_at | 7.63 | 5.16E-23 |
| MIF             | 217871_s_at | 7.63 | 1.70E-18 |
| TMEM14B         | 221452_s_at | 7.62 | 4.70E-22 |
| HLA-E           | 200905_x_at | 7.61 | 1.12E-19 |
| RPS12           | 213377_x_at | 7.59 | 4.80E-22 |

|               |             |      |          |
|---------------|-------------|------|----------|
| P2RX5-TAX1BP3 | 209154_at   | 7.59 | 1.56E-15 |
| TUG1          | 212725_s_at | 7.59 | 7.34E-20 |
| HLA-G         | 211529_x_at | 7.59 | 2.00E-18 |
| PHB2          | 201600_at   | 7.56 | 4.19E-23 |
| EEF1G         | 200689_x_at | 7.56 | 7.23E-21 |
| FSTL1         | 208782_at   | 7.55 | 5.08E-23 |
| TALDO1        | 201463_s_at | 7.55 | 3.12E-25 |
| SUMO3         | 200740_s_at | 7.55 | 3.02E-15 |
| RNF7          | 218286_s_at | 7.55 | 1.66E-23 |
| MDH1          | 200978_at   | 7.53 | 7.84E-27 |
| NPC2          | 200701_at   | 7.52 | 2.35E-22 |
| RPL7A         | 224930_x_at | 7.51 | 1.49E-22 |
| TUBA1C        | 211750_x_at | 7.51 | 3.76E-27 |
| NHP2          | 209104_s_at | 7.50 | 1.01E-22 |
| BTG1          | 200920_s_at | 7.47 | 1.03E-22 |
| CMTM6         | 223047_at   | 7.46 | 1.41E-17 |
| H3F3A         | 209069_s_at | 7.46 | 1.27E-25 |
| CD47          | 211075_s_at | 7.46 | 2.17E-21 |
| SNX7          | 205573_s_at | 7.44 | 1.27E-15 |
| CST3          | 201360_at   | 7.40 | 2.03E-24 |
| GOLM1         | 217771_at   | 7.37 | 6.68E-18 |
| ANTXR2        | 225524_at   | 7.36 | 4.72E-19 |
| TUBB          | 211714_x_at | 7.35 | 2.32E-29 |
| FKBP9         | 212169_at   | 7.32 | 3.17E-23 |
| UQCRH         | 202233_s_at | 7.32 | 8.20E-22 |
| JTB           | 200048_s_at | 7.31 | 2.18E-19 |
| C12orf57      | 224719_s_at | 7.31 | 3.00E-21 |
| RPS15         | 200819_s_at | 7.27 | 5.76E-19 |
| RPS6          | 200081_s_at | 7.26 | 9.54E-22 |
| APMAP         | 206656_s_at | 7.25 | 1.49E-24 |
| SERPINF1      | 202283_at   | 7.24 | 5.09E-14 |
| KRT19         | 201650_at   | 7.24 | 1.05E-10 |
| OBSL1         | 212775_at   | 7.24 | 4.88E-16 |
| HEBP1         | 218450_at   | 7.23 | 4.20E-19 |
| HLA-A         | 215313_x_at | 7.23 | 4.25E-18 |
| VAMP3         | 201336_at   | 7.21 | 2.79E-26 |
| MYL12A        | 201318_s_at | 7.19 | 3.23E-20 |
| LAP3          | 217933_s_at | 7.19 | 1.93E-16 |
| DPM1          | 202673_at   | 7.18 | 3.97E-15 |
| POSTN         | 210809_s_at | 7.18 | 2.43E-06 |
| EIF2S2        | 208726_s_at | 7.18 | 2.04E-25 |

|         |              |      |          |
|---------|--------------|------|----------|
| DSTN    | 201021_s_at  | 7.17 | 4.34E-22 |
| DBI     | 202428_x_at  | 7.15 | 1.62E-27 |
| YTHDF2  | 222430_s_at  | 7.15 | 3.95E-23 |
| MIR636  | 200754_x_at  | 7.14 | 1.52E-26 |
| CSNK1A1 | 208865_at    | 7.13 | 3.42E-20 |
| TXN     | 208864_s_at  | 7.13 | 1.62E-27 |
| NOL7    | 202882_x_at  | 7.12 | 2.23E-21 |
| ENO1    | 201231_s_at  | 7.11 | 6.76E-23 |
| ACTA2   | 200974_at    | 7.10 | 3.04E-12 |
| TGFBR2  | 208944_at    | 7.09 | 1.35E-16 |
| UQCRRS1 | 208909_at    | 7.07 | 6.91E-27 |
| GUK1    | 200075_s_at  | 7.07 | 5.81E-27 |
| PCOLCE  | 202465_at    | 7.05 | 4.00E-23 |
| COL4A2  | 211964_at    | 7.05 | 1.61E-16 |
| PSMC2   | 201068_s_at  | 7.03 | 3.54E-24 |
| RPN2    | 213399_x_at  | 7.00 | 5.41E-19 |
| ARPC3   | 208736_at    | 7.00 | 3.01E-25 |
| CCT6A   | 201327_s_at  | 7.00 | 2.06E-25 |
| TM2D3   | 221702_s_at  | 6.99 | 5.82E-18 |
| RPS2    | 212433_x_at  | 6.99 | 1.90E-22 |
| EIF3M   | 202232_s_at  | 6.97 | 2.52E-24 |
| LSM14A  | 212131_at    | 6.96 | 3.88E-18 |
| EIF3K   | 212716_s_at  | 6.96 | 3.50E-21 |
| CD9     | 201005_at    | 6.94 | 2.59E-14 |
| RPL19   | 200029_at    | 6.94 | 7.10E-22 |
| KPNB1   | 208974_x_at  | 6.93 | 2.45E-18 |
| JAK1    | 201648_at    | 6.93 | 3.05E-21 |
| CCT4    | 200877_at    | 6.92 | 7.20E-18 |
| OLFML3  | 218162_at    | 6.91 | 1.59E-19 |
| PGM1    | 201968_s_at  | 6.90 | 6.09E-16 |
| CAP1    | 200625_s_at  | 6.88 | 1.22E-26 |
| MINOS1  | 224867_at    | 6.88 | 3.92E-22 |
| COL6A3  | 201438_at    | 6.88 | 2.12E-21 |
| KARS    | 200079_s_at  | 6.87 | 1.35E-24 |
| GNB1    | 200745_s_at  | 6.87 | 1.78E-21 |
| DPYSL3  | 201431_s_at  | 6.87 | 6.01E-18 |
| TIMP3   | 201150_s_at  | 6.85 | 1.43E-08 |
| COX1    | 1553538_s_at | 6.85 | 1.74E-13 |
| CD63    | 200663_at    | 6.85 | 4.03E-25 |
| NDUFA13 | 220864_s_at  | 6.83 | 8.82E-30 |
| PPIA    | 211765_x_at  | 6.83 | 6.39E-25 |

|                |             |      |          |
|----------------|-------------|------|----------|
| CD59           | 200985_s_at | 6.83 | 3.87E-28 |
| SRI            | 208921_s_at | 6.82 | 4.34E-22 |
| BLOC1S5-TXNDC5 | 221253_s_at | 6.82 | 6.09E-20 |
| RPS5           | 200024_at   | 6.82 | 2.36E-18 |
| TCEB2          | 200085_s_at | 6.80 | 6.72E-25 |
| LOC101060363   | 212661_x_at | 6.80 | 4.44E-24 |
| PSMB6          | 208827_at   | 6.79 | 5.47E-27 |
| SHC1           | 214853_s_at | 6.78 | 8.42E-26 |
| COPS2          | 202467_s_at | 6.78 | 3.51E-24 |
| TMSB4X         | 216438_s_at | 6.78 | 1.01E-20 |
| SEC31A         | 200945_s_at | 6.77 | 1.95E-19 |
| SEC63          | 201916_s_at | 6.76 | 5.58E-21 |
| CAPRIN1        | 200723_s_at | 6.75 | 2.64E-25 |
| SLC25A5        | 200657_at   | 6.75 | 7.84E-23 |
| NCOA4          | 210774_s_at | 6.74 | 1.68E-16 |
| MAGT1          | 224899_s_at | 6.72 | 2.37E-13 |
| SNORA29        | 208778_s_at | 6.72 | 1.15E-26 |
| RPS10          | 211542_x_at | 6.71 | 6.45E-22 |
| GNAI3          | 201180_s_at | 6.71 | 2.50E-21 |
| MARCKS         | 201669_s_at | 6.71 | 3.00E-09 |
| MSRB3          | 225782_at   | 6.71 | 1.44E-10 |
| CCZ1           | 201973_s_at | 6.68 | 1.43E-17 |
| XPO1           | 208775_at   | 6.68 | 2.36E-16 |
| ATP5L          | 210453_x_at | 6.68 | 5.78E-24 |
| SNRPB          | 208821_at   | 6.68 | 2.14E-23 |
| XRCC5          | 208642_s_at | 6.68 | 6.91E-27 |
| UGP2           | 205480_s_at | 6.67 | 2.84E-21 |
| PSMB4          | 202243_s_at | 6.66 | 1.56E-29 |
| MEST           | 202016_at   | 6.66 | 4.47E-21 |
| CSE1L          | 201112_s_at | 6.65 | 8.13E-21 |
| SNAI2          | 213139_at   | 6.65 | 5.47E-16 |
| ATP6V1D        | 208898_at   | 6.64 | 2.13E-21 |
| UBQLN1         | 222990_at   | 6.64 | 2.22E-19 |
| MAGED1         | 209014_at   | 6.62 | 4.91E-25 |
| TOMM20         | 200662_s_at | 6.62 | 9.57E-19 |
| TCEB1          | 202824_s_at | 6.60 | 1.16E-17 |
| CTNNA1         | 210844_x_at | 6.60 | 1.31E-25 |
| OCIAD1         | 223011_s_at | 6.59 | 7.32E-26 |
| ARL4C          | 202207_at   | 6.59 | 1.12E-14 |
| TRMT112        | 217774_s_at | 6.59 | 1.31E-25 |
| CNIH4          | 218728_s_at | 6.57 | 1.98E-22 |

|              |             |      |          |
|--------------|-------------|------|----------|
| TPM1         | 210987_x_at | 6.56 | 6.14E-23 |
| PPP1CC       | 200726_at   | 6.55 | 6.71E-15 |
| PDIA6        | 207668_x_at | 6.55 | 5.15E-27 |
| SURF4        | 222978_at   | 6.54 | 2.55E-26 |
| CD99         | 201029_s_at | 6.54 | 6.34E-20 |
| FIS1         | 218034_at   | 6.54 | 3.65E-27 |
| C1QBP        | 214214_s_at | 6.54 | 2.50E-17 |
| TUFM         | 201113_at   | 6.53 | 6.12E-29 |
| FBXL5        | 209004_s_at | 6.53 | 2.59E-13 |
| VPS28        | 218679_s_at | 6.53 | 1.47E-21 |
| RCN1         | 201063_at   | 6.52 | 2.28E-23 |
| SAMM50       | 201569_s_at | 6.52 | 1.27E-23 |
| RPL27A       | 203034_s_at | 6.50 | 3.90E-19 |
| COL5A1       | 212488_at   | 6.50 | 4.92E-12 |
| COPB1        | 201359_at   | 6.49 | 2.34E-23 |
| GNS          | 212334_at   | 6.49 | 7.15E-17 |
| SSB          | 201139_s_at | 6.48 | 2.93E-20 |
| LOC101060555 | 223269_at   | 6.48 | 1.49E-20 |
| CLPTM1L      | 223020_at   | 6.47 | 4.56E-24 |
| RPL35A       | 213687_s_at | 6.47 | 5.69E-20 |
| TCEA1        | 216241_s_at | 6.47 | 6.95E-25 |
| CORO1C       | 222409_at   | 6.46 | 2.05E-26 |
| EID1         | 208669_s_at | 6.46 | 4.30E-17 |
| DESI2        | 212371_at   | 6.46 | 7.84E-27 |
| CCT7         | 200812_at   | 6.46 | 2.84E-24 |
| SRP9         | 201273_s_at | 6.44 | 8.89E-16 |
| CAB39        | 217873_at   | 6.43 | 9.96E-16 |
| GTF2I        | 201065_s_at | 6.43 | 2.36E-22 |
| NARR         | 224710_at   | 6.42 | 1.26E-24 |
| ARID4B       | 212591_at   | 6.41 | 1.98E-23 |
| PMEPA1       | 222449_at   | 6.41 | 6.75E-16 |
| TMEM258      | 218213_s_at | 6.40 | 9.23E-20 |
| HINT1        | 200093_s_at | 6.38 | 7.65E-23 |
| SCP2         | 201339_s_at | 6.37 | 1.79E-23 |
| COPS5        | 201652_at   | 6.36 | 6.69E-23 |
| GLTSCR2      | 234339_s_at | 6.35 | 1.13E-14 |
| ERGIC2       | 218135_at   | 6.35 | 2.45E-28 |
| TPM3         | 222976_s_at | 6.34 | 3.69E-24 |
| TIMMDC1      | 223004_s_at | 6.34 | 1.77E-21 |
| EIF3E        | 208697_s_at | 6.33 | 2.71E-18 |
| RPS4X        | 200933_x_at | 6.33 | 5.88E-18 |

|          |             |      |          |
|----------|-------------|------|----------|
| SCOC     | 224786_at   | 6.33 | 2.15E-13 |
| CD81     | 200675_at   | 6.33 | 3.59E-22 |
| TMED10   | 212352_s_at | 6.31 | 3.42E-21 |
| USMG5    | 225413_at   | 6.30 | 1.38E-21 |
| PRRC1    | 224643_at   | 6.28 | 3.09E-14 |
| SLC39A10 | 225295_at   | 6.28 | 1.77E-11 |
| CAV1     | 212097_at   | 6.27 | 3.49E-19 |
| ATP5J    | 202325_s_at | 6.26 | 8.10E-23 |
| GXYLT2   | 235371_at   | 6.26 | 5.12E-12 |
| CHCHD1   | 226896_at   | 6.26 | 9.03E-22 |
| GAS6     | 202177_at   | 6.25 | 1.72E-20 |
| IFI16    | 208966_x_at | 6.25 | 7.35E-13 |
| SERPINH1 | 207714_s_at | 6.25 | 2.53E-25 |
| CALD1    | 201616_s_at | 6.25 | 1.71E-25 |
| ALDOA    | 214687_x_at | 6.24 | 1.69E-22 |
| S100A6   | 217728_at   | 6.24 | 8.98E-29 |
| EIF4E2   | 213571_s_at | 6.24 | 5.85E-15 |
| FBN1     | 202766_s_at | 6.23 | 3.72E-14 |
| SYNCRIP  | 209024_s_at | 6.23 | 2.00E-23 |
| COX4I1   | 202698_x_at | 6.23 | 3.74E-20 |
| TRIP6    | 209129_at   | 6.23 | 6.72E-22 |
| KLHDC2   | 217906_at   | 6.22 | 1.94E-22 |
| PSEN1    | 203460_s_at | 6.22 | 3.20E-21 |
| DNAJA1   | 200881_s_at | 6.22 | 1.27E-23 |
| PAPSS1   | 209043_at   | 6.22 | 2.50E-27 |
| ANXA5    | 200782_at   | 6.21 | 2.37E-21 |
| ARPC5L   | 226914_at   | 6.20 | 1.16E-17 |
| TMSB10   | 217733_s_at | 6.19 | 4.89E-19 |
| PDLIM5   | 203243_s_at | 6.19 | 1.22E-12 |
| ANXA4    | 201301_s_at | 6.18 | 6.89E-20 |
| TMEM30A  | 217743_s_at | 6.18 | 5.67E-15 |
| MMP2     | 201069_at   | 6.18 | 1.42E-19 |
| HNRNPH2  | 201132_at   | 6.18 | 1.78E-16 |
| CSTB     | 201201_at   | 6.17 | 1.50E-21 |
| MIR21    | 220990_s_at | 6.16 | 1.90E-13 |
| BUD31    | 205690_s_at | 6.16 | 3.49E-24 |
| LAMTOR5  | 202300_at   | 6.16 | 7.65E-27 |
| SRP72    | 208095_s_at | 6.16 | 1.91E-21 |
| HEG1     | 213069_at   | 6.15 | 1.17E-16 |
| PIGY     | 224660_at   | 6.15 | 7.65E-20 |
| ANXA2    | 201590_x_at | 6.14 | 2.31E-20 |



|          |              |      |          |
|----------|--------------|------|----------|
| MIR4691  | 203190_at    | 6.14 | 1.07E-21 |
| SLC39A6  | 202088_at    | 6.12 | 2.98E-12 |
| PABPC4   | 201064_s_at  | 6.12 | 6.91E-27 |
| NCOR2    | 207760_s_at  | 6.11 | 6.53E-23 |
| ITGB1    | 1553678_a_at | 6.11 | 3.75E-24 |
| APEX1    | 210027_s_at  | 6.11 | 2.47E-23 |
| RPL30    | 200062_s_at  | 6.10 | 4.48E-20 |
| PXDN     | 212013_at    | 6.09 | 1.38E-22 |
| PSMD6    | 202753_at    | 6.09 | 1.14E-31 |
| XRCC6    | 200792_at    | 6.09 | 5.32E-26 |
| COX6B1   | 201441_at    | 6.09 | 1.49E-22 |
| SF3B1    | 201071_x_at  | 6.08 | 2.03E-19 |
| DDX1     | 201241_at    | 6.08 | 5.67E-25 |
| RPS3A    | 200099_s_at  | 6.08 | 1.58E-17 |
| RPL17    | 200038_s_at  | 6.08 | 2.58E-20 |
| DYNLT1   | 201999_s_at  | 6.07 | 5.19E-21 |
| ST13     | 207040_s_at  | 6.07 | 5.23E-19 |
| RECQL    | 212918_at    | 6.06 | 1.19E-11 |
| ECHS1    | 201135_at    | 6.06 | 1.61E-24 |
| GPNMB    | 201141_at    | 6.05 | 4.11E-09 |
| SEPW1    | 201194_at    | 6.04 | 4.80E-27 |
| HSPA5    | 211936_at    | 6.03 | 5.76E-28 |
| CLIC1    | 208659_at    | 6.02 | 6.83E-24 |
| ATP6VOE1 | 201172_x_at  | 6.02 | 4.50E-28 |
| RRM1     | 201477_s_at  | 6.01 | 2.72E-25 |
| NDUFC2   | 218101_s_at  | 6.01 | 1.02E-20 |
| GPI      | 208308_s_at  | 6.01 | 5.65E-28 |
| HEXB     | 201944_at    | 6.01 | 6.89E-20 |
| HNRNPR   | 208766_s_at  | 6.01 | 3.82E-16 |
| NUP153   | 202097_at    | 6.00 | 5.07E-17 |
| FUS      | 200959_at    | 6.00 | 6.66E-17 |
| PQLC3    | 225579_at    | 6.00 | 2.21E-16 |
| TMEM14C  | 223106_at    | 6.00 | 1.49E-18 |
| NUCB2    | 203675_at    | 5.99 | 1.18E-22 |
| SDF4     | 232032_x_at  | 5.99 | 3.94E-28 |
| TUBB2A   | 204141_at    | 5.99 | 4.80E-14 |
| RNF145   | 226077_at    | 5.99 | 3.46E-22 |
| MIR4745  | 216306_x_at  | 5.98 | 2.40E-33 |
| TMED3    | 208837_at    | 5.98 | 1.93E-25 |
| COX6A1   | 200925_at    | 5.97 | 6.99E-24 |
| UBA1     | 200964_at    | 5.96 | 4.09E-25 |

|          |             |      |          |
|----------|-------------|------|----------|
| MALSU1   | 226385_s_at | 5.96 | 4.33E-15 |
| MESDC2   | 224675_at   | 5.96 | 2.05E-16 |
| ANAPC13  | 209001_s_at | 5.95 | 2.33E-21 |
| SULF2    | 224724_at   | 5.95 | 1.28E-14 |
| RAB31    | 217763_s_at | 5.94 | 5.11E-14 |
| FERMT2   | 209210_s_at | 5.93 | 6.94E-13 |
| NREP     | 201310_s_at | 5.93 | 5.11E-20 |
| GATC     | 201698_s_at | 5.93 | 2.73E-22 |
| TGFBI    | 201506_at   | 5.93 | 2.25E-18 |
| PAIP2    | 222984_at   | 5.92 | 7.14E-18 |
| PHPT1    | 223207_x_at | 5.92 | 1.13E-25 |
| LEPROT   | 202378_s_at | 5.91 | 1.32E-20 |
| TRA2B    | 200893_at   | 5.91 | 3.23E-13 |
| SLC38A2  | 220924_s_at | 5.91 | 2.16E-26 |
| HERPUD1  | 217168_s_at | 5.90 | 1.45E-18 |
| RABAC1   | 203136_at   | 5.90 | 2.93E-25 |
| RHEB     | 213404_s_at | 5.90 | 7.85E-14 |
| FAM114A1 | 213455_at   | 5.90 | 2.07E-21 |
| RPL7     | 212042_x_at | 5.89 | 1.63E-16 |
| RPLP1    | 200763_s_at | 5.89 | 4.15E-20 |
| C1orf43  | 223034_s_at | 5.89 | 4.38E-24 |
| KMT2E    | 223190_s_at | 5.89 | 2.42E-14 |
| LITAF    | 200704_at   | 5.89 | 7.82E-16 |
| PDGFC    | 218718_at   | 5.88 | 1.85E-11 |
| CDH11    | 207173_x_at | 5.88 | 2.92E-09 |
| HMGNA4   | 209786_at   | 5.87 | 1.86E-10 |
| DKK3     | 214247_s_at | 5.87 | 1.07E-09 |
| DUT      | 208956_x_at | 5.87 | 1.56E-17 |
| COL1A2   | 202403_s_at | 5.86 | 1.51E-15 |
| DYNLL1   | 200703_at   | 5.85 | 1.58E-25 |
| IFITM1   | 201601_x_at | 5.85 | 3.13E-21 |
| RPL24    | 200013_at   | 5.85 | 8.74E-20 |
| ILF3     | 211375_s_at | 5.85 | 1.63E-22 |
| TIMM23   | 225535_s_at | 5.84 | 1.49E-18 |
| HSPA4    | 208815_x_at | 5.84 | 2.46E-23 |
| HSD17B4  | 201413_at   | 5.84 | 6.24E-21 |
| PABPC3   | 208113_x_at | 5.83 | 8.53E-20 |
| CBX1     | 201518_at   | 5.83 | 7.30E-20 |
| DNAJC3   | 225284_at   | 5.82 | 6.51E-20 |
| EIF3F    | 200023_s_at | 5.82 | 7.60E-22 |
| FNDC3B   | 218618_s_at | 5.81 | 4.14E-17 |

|          |             |      |          |
|----------|-------------|------|----------|
| C10orf99 | 224373_s_at | 5.81 | 2.92E-15 |
| PSMB7    | 200786_at   | 5.81 | 1.27E-24 |
| ATP5B    | 201322_at   | 5.81 | 1.32E-26 |
| FAM162A  | 223193_x_at | 5.81 | 3.42E-21 |
| ZFP36L2  | 201368_at   | 5.80 | 3.61E-14 |
| DENR     | 231896_s_at | 5.80 | 5.31E-24 |
| BRI3     | 223376_s_at | 5.80 | 2.06E-22 |
| CNIH     | 201653_at   | 5.79 | 1.08E-09 |
| PPA1     | 217848_s_at | 5.79 | 1.72E-15 |
| GJA1     | 201667_at   | 5.79 | 6.10E-11 |
| EDEM3    | 223243_s_at | 5.79 | 3.15E-16 |
| C11orf58 | 201784_s_at | 5.78 | 8.20E-20 |
| MYADM    | 225673_at   | 5.78 | 1.69E-20 |
| SGCE     | 204688_at   | 5.78 | 1.54E-15 |
| PAFAH1B1 | 200816_s_at | 5.78 | 1.08E-17 |
| DCAF13   | 225676_s_at | 5.78 | 1.55E-21 |
| TOR1AIP1 | 212408_at   | 5.77 | 4.36E-18 |
| MORF4L1  | 224561_s_at | 5.77 | 4.00E-20 |
| TMEM230  | 224584_at   | 5.77 | 1.47E-16 |
| NDUFB2   | 218200_s_at | 5.76 | 7.38E-17 |
| TSPAN3   | 200972_at   | 5.76 | 8.42E-26 |
| RHOBTB3  | 225202_at   | 5.75 | 4.73E-13 |
| YME1L1   | 201351_s_at | 5.75 | 2.11E-23 |
| ODC1     | 200790_at   | 5.75 | 7.23E-23 |
| IFI44    | 214453_s_at | 5.75 | 2.21E-11 |
| RAB7A    | 211961_s_at | 5.74 | 2.22E-21 |
| MRPS24   | 224948_at   | 5.74 | 8.65E-27 |
| CSNK2B   | 201390_s_at | 5.73 | 4.79E-23 |
| ARID5B   | 212614_at   | 5.73 | 1.20E-20 |
| CTR9     | 202060_at   | 5.73 | 1.62E-17 |
| DAZAP2   | 200794_x_at | 5.72 | 6.21E-22 |
| RAB11A   | 200863_s_at | 5.72 | 6.42E-22 |
| ITGB1BP1 | 203336_s_at | 5.71 | 1.86E-22 |
| CLTC     | 200614_at   | 5.71 | 5.46E-19 |
| TAPBP    | 208829_at   | 5.71 | 1.01E-18 |
| PSMC6    | 201699_at   | 5.71 | 1.92E-13 |
| SQSTM1   | 201471_s_at | 5.71 | 3.48E-24 |
| GARS     | 208693_s_at | 5.71 | 5.14E-31 |
| GGCT     | 215380_s_at | 5.70 | 2.77E-18 |
| GLB1     | 201576_s_at | 5.70 | 1.58E-25 |
| DPYSL2   | 200762_at   | 5.70 | 4.29E-16 |

|          |             |      |          |
|----------|-------------|------|----------|
| EGLN1    | 223046_at   | 5.70 | 1.56E-17 |
| WDR61    | 221532_s_at | 5.70 | 9.05E-20 |
| CUTA     | 221488_s_at | 5.70 | 1.18E-21 |
| COL6A1   | 213428_s_at | 5.70 | 2.89E-18 |
| PWP1     | 201606_s_at | 5.69 | 8.56E-24 |
| STAT3    | 208991_at   | 5.69 | 7.98E-20 |
| HNRNPK   | 200097_s_at | 5.69 | 1.25E-18 |
| EAPP     | 202623_at   | 5.69 | 1.07E-19 |
| KIF5B    | 201991_s_at | 5.69 | 1.29E-15 |
| GDI2     | 200009_at   | 5.69 | 8.49E-25 |
| RCN2     | 201485_s_at | 5.68 | 8.15E-24 |
| SLC25A36 | 201917_s_at | 5.67 | 4.87E-15 |
| GNB4     | 225710_at   | 5.67 | 6.60E-10 |
| RCN3     | 61734_at    | 5.67 | 5.67E-22 |
| PSMA1    | 211746_x_at | 5.66 | 7.55E-22 |
| PRSS23   | 202458_at   | 5.65 | 8.65E-13 |
| CAPZB    | 37012_at    | 5.65 | 1.08E-21 |
| C1R      | 212067_s_at | 5.64 | 4.44E-16 |
| ERRFI1   | 224657_at   | 5.64 | 1.60E-11 |
| CMPK1    | 217870_s_at | 5.64 | 2.45E-16 |
| QARS     | 217846_at   | 5.64 | 5.26E-22 |
| MSN      | 200600_at   | 5.64 | 1.32E-26 |
| S100A11  | 200660_at   | 5.62 | 7.96E-24 |
| NDUFS5   | 201757_at   | 5.62 | 1.88E-26 |
| FHL2     | 202949_s_at | 5.62 | 2.41E-18 |
| C16orf80 | 217957_at   | 5.62 | 2.66E-26 |
| SFT2D1   | 225849_s_at | 5.62 | 9.28E-16 |
| SPCS2    | 201240_s_at | 5.61 | 9.24E-14 |
| TBL1XR1  | 222633_at   | 5.61 | 2.20E-20 |
| FBL      | 211623_s_at | 5.60 | 8.87E-19 |
| GNG5     | 207157_s_at | 5.59 | 4.84E-23 |
| PNMA1    | 218224_at   | 5.59 | 5.31E-20 |
| TM9SF2   | 201078_at   | 5.58 | 4.19E-23 |
| RAB2A    | 208734_x_at | 5.58 | 1.58E-22 |
| NPEPPS   | 201454_s_at | 5.58 | 1.04E-20 |
| UBE2E1   | 212519_at   | 5.57 | 3.66E-16 |
| ZFAND5   | 210275_s_at | 5.57 | 2.15E-19 |
| OST4     | 224637_at   | 5.57 | 3.86E-31 |
| HNRNPA0  | 201054_at   | 5.57 | 2.45E-16 |
| PRPF8    | 200000_s_at | 5.56 | 2.34E-21 |
| CREG1    | 201200_at   | 5.56 | 4.50E-15 |

|              |             |      |          |
|--------------|-------------|------|----------|
| CARKD        | 217940_s_at | 5.56 | 1.12E-15 |
| UBE2D3       | 200667_at   | 5.56 | 3.63E-14 |
| BUB3         | 209974_s_at | 5.56 | 6.42E-16 |
| CDIPT        | 201253_s_at | 5.55 | 4.35E-17 |
| SLC38A1      | 224579_at   | 5.55 | 3.48E-17 |
| LIPA         | 201847_at   | 5.54 | 3.38E-15 |
| SSPN         | 226932_at   | 5.54 | 4.45E-14 |
| REXO2        | 218194_at   | 5.54 | 1.78E-20 |
| GPX4         | 201106_at   | 5.53 | 9.54E-22 |
| HSPA1A       | 202581_at   | 5.53 | 1.44E-13 |
| NNMT         | 202238_s_at | 5.53 | 1.30E-11 |
| RAD23B       | 201222_s_at | 5.53 | 2.40E-33 |
| NDUFA12      | 223244_s_at | 5.53 | 5.91E-17 |
| HARS         | 202042_at   | 5.52 | 1.76E-29 |
| IGFBP2       | 202718_at   | 5.52 | 5.90E-17 |
| VCAN         | 221731_x_at | 5.51 | 4.29E-07 |
| SKP1         | 200718_s_at | 5.51 | 3.40E-15 |
| HSPE1        | 205133_s_at | 5.51 | 9.06E-23 |
| TAF7         | 201023_at   | 5.51 | 5.26E-23 |
| SUMF1        | 226850_at   | 5.49 | 1.48E-17 |
| TMEM54       | 202090_s_at | 5.48 | 9.25E-17 |
| RPA1         | 201528_at   | 5.48 | 3.95E-17 |
| PAM          | 212958_x_at | 5.48 | 7.81E-15 |
| ATP5G2       | 208764_s_at | 5.48 | 2.41E-26 |
| MAEA         | 207922_s_at | 5.47 | 6.51E-21 |
| TCEAL4       | 202371_at   | 5.47 | 8.64E-11 |
| TARDBP       | 200020_at   | 5.47 | 5.47E-21 |
| LOC100996253 | 200610_s_at | 5.47 | 2.67E-25 |
| RND3         | 212724_at   | 5.46 | 3.49E-24 |
| RWDD1        | 219598_s_at | 5.46 | 3.04E-18 |
| AKAP2        | 202760_s_at | 5.45 | 1.23E-16 |
| TFRC         | 208691_at   | 5.45 | 2.74E-12 |
| H1FX         | 204805_s_at | 5.45 | 3.88E-19 |
| PSMC5        | 209503_s_at | 5.44 | 2.16E-26 |
| PRDX1        | 208680_at   | 5.44 | 4.06E-26 |
| TROVE2       | 210438_x_at | 5.44 | 4.06E-25 |
| TMBIM6       | 200804_at   | 5.43 | 2.00E-23 |
| RBM39        | 207941_s_at | 5.43 | 9.39E-16 |
| C20orf24     | 223880_x_at | 5.43 | 6.33E-23 |
| ENSA         | 202596_at   | 5.43 | 6.17E-20 |
| UBE2E3       | 210024_s_at | 5.43 | 2.74E-23 |

|              |              |      |          |
|--------------|--------------|------|----------|
| UHRF2        | 225610_at    | 5.42 | 5.39E-19 |
| DDX47        | 220890_s_at  | 5.42 | 3.17E-21 |
| ARF1         | 200065_s_at  | 5.42 | 2.90E-28 |
| HSPA9        | 200691_s_at  | 5.42 | 6.39E-25 |
| PTP4A2       | 216988_s_at  | 5.42 | 2.27E-32 |
| VBP1         | 201472_at    | 5.41 | 2.80E-22 |
| CCNY         | 224651_at    | 5.41 | 3.88E-19 |
| GOLGA5       | 218241_at    | 5.41 | 5.18E-22 |
| MIR1292      | 200875_s_at  | 5.40 | 1.81E-19 |
| GALNT2       | 217788_s_at  | 5.40 | 2.05E-22 |
| DDAH1        | 209094_at    | 5.40 | 1.01E-20 |
| ASH1L        | 222667_s_at  | 5.40 | 1.41E-16 |
| CDC42BPA     | 214464_at    | 5.39 | 1.21E-13 |
| TSPAN6       | 209108_at    | 5.39 | 5.63E-11 |
| EMC2         | 203584_at    | 5.39 | 2.21E-19 |
| NFU1         | 218946_at    | 5.38 | 5.84E-25 |
| FAM101B      | 226905_at    | 5.38 | 4.01E-12 |
| SEC61G       | 203484_at    | 5.38 | 2.12E-32 |
| ATG3         | 221492_s_at  | 5.38 | 2.04E-19 |
| CHMP3        | 222437_s_at  | 5.38 | 4.00E-25 |
| C12orf23     | 224759_s_at  | 5.37 | 5.27E-14 |
| PLOD2        | 202619_s_at  | 5.37 | 6.03E-23 |
| TSPYL1       | 221493_at    | 5.36 | 2.02E-11 |
| ATP1B3       | 208836_at    | 5.36 | 2.06E-16 |
| LOC101060281 | 208091_s_at  | 5.36 | 1.38E-18 |
| UQCRC2       | 212600_s_at  | 5.36 | 3.58E-19 |
| YPEL5        | 217783_s_at  | 5.36 | 4.00E-17 |
| CAPZA1       | 208374_s_at  | 5.36 | 1.56E-17 |
| MGAT4B       | 224598_at    | 5.36 | 1.29E-14 |
| VPS26A       | 201807_at    | 5.36 | 2.21E-12 |
| TPM4         | 1567107_s_at | 5.36 | 1.04E-12 |
| CD2AP        | 203593_at    | 5.36 | 3.04E-17 |
| NDUFB9       | 222992_s_at  | 5.36 | 9.23E-20 |
| TEAD1        | 224955_at    | 5.35 | 1.84E-25 |
| ASNSD1       | 217987_at    | 5.35 | 5.23E-19 |
| MFSD1        | 218109_s_at  | 5.35 | 3.08E-15 |
| UAP1         | 209340_at    | 5.34 | 3.27E-26 |
| FXR1         | 201637_s_at  | 5.34 | 4.68E-25 |
| SEC16A       | 215696_s_at  | 5.33 | 2.12E-20 |
| ZNF330       | 209814_at    | 5.33 | 5.96E-15 |
| PTTG1IP      | 200677_at    | 5.33 | 4.01E-17 |

|            |             |      |          |
|------------|-------------|------|----------|
| PCNA       | 201202_at   | 5.33 | 9.77E-17 |
| CBFB       | 202370_s_at | 5.32 | 6.26E-17 |
| GLG1       | 207966_s_at | 5.32 | 1.19E-20 |
| SARNP      | 224914_s_at | 5.32 | 1.33E-26 |
| RBM14-RBM4 | 200997_at   | 5.32 | 3.88E-22 |
| FAM120A    | 200774_at   | 5.32 | 7.48E-19 |
| AHCYL1     | 200850_s_at | 5.32 | 1.34E-25 |
| CDC5L      | 209056_s_at | 5.31 | 2.02E-17 |
| PRKAR1A    | 200605_s_at | 5.31 | 1.10E-21 |
| RAB1A      | 208724_s_at | 5.30 | 2.49E-20 |
| AZIN1      | 212461_at   | 5.30 | 9.25E-15 |
| WDR1       | 200609_s_at | 5.30 | 2.92E-21 |
| VIMP       | 223209_s_at | 5.30 | 6.31E-26 |
| KPNA2      | 201088_at   | 5.29 | 4.26E-11 |
| PRPF31     | 202408_s_at | 5.29 | 5.03E-22 |
| SNW1       | 201575_at   | 5.29 | 6.66E-20 |
| BZW1       | 200777_s_at | 5.28 | 2.39E-16 |
| SRPRB      | 218140_x_at | 5.28 | 2.13E-18 |
| EMP1       | 201324_at   | 5.28 | 9.71E-11 |
| SGCB       | 205120_s_at | 5.27 | 4.60E-22 |
| CXXC5      | 224516_s_at | 5.27 | 1.31E-19 |
| RPS24      | 200061_s_at | 5.27 | 4.59E-21 |
| SERP1      | 200971_s_at | 5.27 | 7.93E-20 |
| GHITM      | 209248_at   | 5.27 | 3.46E-18 |
| NME1       | 201268_at   | 5.27 | 5.58E-21 |
| NARS       | 200027_at   | 5.26 | 1.56E-14 |
| SQLE       | 209218_at   | 5.26 | 3.05E-27 |
| LRPPRC     | 211615_s_at | 5.26 | 1.29E-18 |
| SRRM2      | 208610_s_at | 5.26 | 3.21E-10 |
| MYLK       | 202555_s_at | 5.25 | 4.95E-14 |
| LBH        | 221011_s_at | 5.25 | 6.90E-17 |
| WDR45      | 209216_at   | 5.25 | 6.07E-24 |
| TMEM200A   | 234994_at   | 5.25 | 6.39E-10 |
| GOLGA7     | 217819_at   | 5.25 | 2.58E-19 |
| FDPS       | 201275_at   | 5.24 | 4.92E-22 |
| DDX3X      | 201210_at   | 5.24 | 3.74E-16 |
| MRPL9      | 209609_s_at | 5.24 | 2.44E-19 |
| FGFR10P2   | 233898_s_at | 5.23 | 3.75E-13 |
| NGFRAP1    | 217963_s_at | 5.22 | 8.91E-15 |
| MRFAP1L1   | 212199_at   | 5.22 | 9.86E-26 |
| RBBP7      | 201092_at   | 5.22 | 2.41E-15 |

|              |             |      |          |
|--------------|-------------|------|----------|
| SRSF6        | 208804_s_at | 5.22 | 8.72E-19 |
| PPT1         | 200975_at   | 5.22 | 5.23E-14 |
| CAPNS1       | 200001_at   | 5.22 | 7.55E-30 |
| WBP5         | 217975_at   | 5.22 | 7.40E-12 |
| EMC4         | 223043_at   | 5.22 | 4.41E-24 |
| COX6C        | 201754_at   | 5.22 | 4.11E-20 |
| ANKIB1       | 224687_at   | 5.22 | 2.56E-22 |
| RPL36A       | 201406_at   | 5.22 | 1.15E-26 |
| VDAC1        | 212038_s_at | 5.22 | 1.11E-25 |
| SEC61B       | 203133_at   | 5.21 | 1.92E-20 |
| MCL1         | 200797_s_at | 5.20 | 4.51E-17 |
| PGAM1        | 200886_s_at | 5.19 | 3.43E-19 |
| TMED9        | 205812_s_at | 5.19 | 6.27E-17 |
| RPL36        | 219762_s_at | 5.19 | 3.14E-22 |
| TM2D2        | 224413_s_at | 5.19 | 4.68E-22 |
| PEBP1        | 205353_s_at | 5.18 | 7.98E-29 |
| ATP6AP2      | 201443_s_at | 5.18 | 5.08E-12 |
| IL13RA1      | 201887_at   | 5.17 | 5.02E-19 |
| PSMA3        | 201532_at   | 5.17 | 8.29E-29 |
| ACTN1        | 208637_x_at | 5.17 | 9.89E-30 |
| PSMG2        | 218467_at   | 5.17 | 7.05E-24 |
| LOC100506710 | 225640_at   | 5.17 | 3.28E-18 |
| C17orf49     | 224574_at   | 5.17 | 3.75E-24 |
| ARL8B        | 217852_s_at | 5.16 | 2.09E-15 |
| EFEMP2       | 209356_x_at | 5.15 | 6.56E-23 |
| YWHAE        | 210996_s_at | 5.15 | 1.61E-28 |
| SDC2         | 212158_at   | 5.15 | 9.55E-15 |
| SNHG16       | 224603_at   | 5.15 | 2.85E-25 |
| ADI1         | 217761_at   | 5.15 | 1.87E-16 |
| PAICS        | 201013_s_at | 5.15 | 2.71E-18 |
| STAG2        | 209022_at   | 5.14 | 5.00E-19 |
| SNX3         | 210648_x_at | 5.14 | 1.03E-16 |
| LAMB2        | 216264_s_at | 5.14 | 9.76E-21 |
| NID2         | 204114_at   | 5.14 | 2.51E-08 |
| TOMM5        | 225036_at   | 5.13 | 7.32E-12 |
| FKBP11       | 219117_s_at | 5.13 | 2.11E-09 |
| BCAP31       | 200837_at   | 5.13 | 1.99E-24 |
| TMEM50A      | 222401_s_at | 5.13 | 1.15E-21 |
| UXT          | 218495_at   | 5.13 | 3.34E-22 |
| PLXNA1       | 221538_s_at | 5.12 | 1.26E-16 |
| NDUFV1       | 208714_at   | 5.12 | 1.02E-18 |



|          |             |      |          |
|----------|-------------|------|----------|
| TMEM14A  | 218477_at   | 5.12 | 8.02E-14 |
| PSMD4    | 210460_s_at | 5.11 | 3.85E-24 |
| MIR1304  | 222728_s_at | 5.11 | 4.40E-15 |
| EMILIN1  | 204163_at   | 5.11 | 3.74E-15 |
| EIF5     | 208706_s_at | 5.11 | 6.12E-19 |
| FUNDC2   | 223042_s_at | 5.11 | 1.88E-21 |
| EIF3G    | 208887_at   | 5.11 | 4.12E-18 |
| GPX3     | 201348_at   | 5.11 | 6.54E-08 |
| MAP4     | 212566_at   | 5.10 | 7.39E-20 |
| PSMB8    | 209040_s_at | 5.10 | 1.36E-17 |
| PSAP     | 200871_s_at | 5.10 | 6.44E-19 |
| NDUFS6   | 203606_at   | 5.10 | 3.74E-21 |
| TUBA1A   | 209118_s_at | 5.10 | 5.79E-15 |
| G3BP1    | 201503_at   | 5.10 | 1.59E-21 |
| EIF3B    | 203462_x_at | 5.10 | 2.20E-25 |
| PPP2R5C  | 201877_s_at | 5.09 | 6.44E-17 |
| STAT1    | 200887_s_at | 5.09 | 1.15E-10 |
| LMNA     | 203411_s_at | 5.09 | 9.73E-35 |
| NDUFB5   | 203621_at   | 5.09 | 1.20E-14 |
| EBNA1BP2 | 201323_at   | 5.09 | 3.42E-20 |
| HNRNPA3  | 211931_s_at | 5.09 | 5.22E-16 |
| ATP6V1G1 | 208737_at   | 5.09 | 4.92E-21 |
| RBFOX2   | 212104_s_at | 5.09 | 1.95E-18 |
| BHLHE40  | 201170_s_at | 5.08 | 4.72E-15 |
| ARL6IP5  | 200760_s_at | 5.08 | 2.49E-25 |
| ERLIN1   | 202441_at   | 5.08 | 2.52E-23 |
| TMEM59   | 200620_at   | 5.08 | 1.11E-23 |
| PDHB     | 211023_at   | 5.08 | 3.95E-19 |
| CDK2AP1  | 201938_at   | 5.08 | 2.15E-16 |
| LAMP2    | 203042_at   | 5.08 | 5.71E-14 |
| CCDC6    | 225010_at   | 5.08 | 4.52E-13 |
| TMBIM4   | 223892_s_at | 5.08 | 2.13E-21 |
| ARCN1    | 201176_s_at | 5.07 | 4.19E-21 |
| KIAA1191 | 224502_s_at | 5.07 | 4.43E-19 |
| AIDA     | 226801_s_at | 5.07 | 2.22E-19 |
| SUCLG1   | 217874_at   | 5.07 | 2.65E-22 |
| BTBD3    | 202946_s_at | 5.07 | 6.88E-14 |
| LAPTM4A  | 200673_at   | 5.07 | 4.15E-16 |
| HMG2     | 208668_x_at | 5.07 | 2.57E-23 |
| CEBPB    | 212501_at   | 5.07 | 2.20E-12 |
| RPS18    | 201049_s_at | 5.06 | 8.08E-20 |

|             |             |      |          |
|-------------|-------------|------|----------|
| CFDP1       | 203166_at   | 5.06 | 6.66E-22 |
| METAP2      | 209861_s_at | 5.05 | 4.03E-25 |
| SLC44A1     | 224596_at   | 5.05 | 6.15E-10 |
| STUB1       | 227625_s_at | 5.05 | 7.95E-24 |
| BECN1       | 208946_s_at | 5.05 | 9.24E-18 |
| LYPLA1      | 203007_x_at | 5.05 | 6.91E-17 |
| USP1        | 202413_s_at | 5.05 | 5.19E-13 |
| VPS51       | 217969_at   | 5.05 | 1.36E-17 |
| TIMM17A     | 215171_s_at | 5.05 | 1.71E-11 |
| CCDC142     | 225523_at   | 5.05 | 1.68E-18 |
| PKD2        | 203688_at   | 5.05 | 3.92E-21 |
| METTL23     | 225808_at   | 5.05 | 5.70E-26 |
| ARL3        | 202641_at   | 5.04 | 1.31E-19 |
| SUB1        | 224587_at   | 5.04 | 1.78E-10 |
| ARMCX3      | 217858_s_at | 5.04 | 2.15E-19 |
| MIR4784     | 213166_x_at | 5.03 | 1.78E-17 |
| CAMTA1      | 225693_s_at | 5.03 | 4.46E-21 |
| ISLR        | 207191_s_at | 5.03 | 1.80E-12 |
| RBM3        | 208319_s_at | 5.02 | 1.53E-24 |
| ANXA11      | 206200_s_at | 5.02 | 1.25E-17 |
| SNRPD3      | 202567_at   | 5.02 | 4.20E-19 |
| SENP6       | 202318_s_at | 5.01 | 5.20E-18 |
| AHCY        | 200903_s_at | 5.01 | 5.78E-24 |
| POMP        | 217769_s_at | 5.01 | 4.85E-27 |
| PLK2        | 201939_at   | 5.01 | 1.08E-14 |
| CCDC80      | 225242_s_at | 5.01 | 7.62E-11 |
| GPX8        | 227628_at   | 5.01 | 2.55E-18 |
| MINOS1-NBL1 | 37005_at    | 5.00 | 1.81E-14 |

**Downregulated genes (Fold change>5; Two-tailed Moderated *t*-test with Benjamini-Hochberg multiple testing adjusted P<0.05)**

| Gene symbol | Probe set ID | Fold change | P-value  |
|-------------|--------------|-------------|----------|
| ZNF548      | 1553718_at   | -7.50       | 4.12E-20 |
| TCTE3       | 1554400_at   | -6.44       | 3.51E-25 |
| LRRC25      | 1559502_s_at | -5.86       | 3.78E-20 |
| ASB12       | 236033_at    | -5.12       | 6.18E-18 |

P-values were calculated by Moderated *t*-tests with Benjamini-Hochberg multiple testing adjustment. All statistical tests were two-sided.

**Supplementary Table 3.** Differentially expressed genes in MSCs when compared with CAF-N**Upregulated genes (Fold change>5; Two-tailed Moderated *t*-test with Benjamini-Hochberg multiple testing adjusted P<0.05)**

| Gene symbol | Probe set ID | Fold change | P-value    |
|-------------|--------------|-------------|------------|
| EIF5A       | 201123_s_at  | 350.49      | < 2.90E-44 |
| PENK        | 213791_at    | 341.76      | < 2.90E-44 |
| TPM1        | 206116_s_at  | 327.92      | 7.74E-32   |
| PFN1        | 200634_at    | 302.22      | 1.16E-40   |
| SRGN        | 201858_s_at  | 243.16      | 3.50E-34   |
| RHOA        | 1555814_a_at | 236.03      | < 2.90E-44 |
| PTX3        | 206157_at    | 228.43      | 2.92E-37   |
| PPAP2B      | 209355_s_at  | 212.07      | 1.21E-33   |
| ENO1        | 217294_s_at  | 197.73      | < 2.90E-44 |
| ARPC2       | 208679_s_at  | 192.74      | 5.48E-26   |
| OAZ1        | 215952_s_at  | 188.85      | 1.50E-25   |
| TUBB3       | 213476_x_at  | 178.93      | 3.01E-39   |
| ITGB1       | 1553678_a_at | 177.31      | 1.70E-24   |
| IGFBP3      | 212143_s_at  | 173.75      | 1.66E-39   |
| CFL1        | 1555730_a_at | 169.59      | < 2.90E-44 |
| HSPA8       | 210338_s_at  | 164.22      | 1.91E-28   |
| TUBB        | 211714_x_at  | 160.33      | 2.27E-30   |
| NQO1        | 210519_s_at  | 155.84      | 4.71E-40   |
| LOX         | 204298_s_at  | 150.32      | 1.23E-26   |
| COL6A2      | 209156_s_at  | 148.82      | 1.11E-22   |
| YBX1        | 208627_s_at  | 147.10      | 3.65E-34   |
| COTL1       | 224583_at    | 146.85      | 3.77E-37   |
| TAGLN       | 1555724_s_at | 145.55      | 1.01E-42   |
| PLOD2       | 202619_s_at  | 144.42      | 3.36E-23   |
| PTP4A2      | 216988_s_at  | 138.39      | 1.11E-33   |
| CD59        | 200983_x_at  | 137.28      | 1.08E-35   |
| YWHAB       | 217717_s_at  | 135.12      | 4.33E-36   |
| ACTN1       | 208637_x_at  | 133.81      | 8.21E-31   |
| DKK1        | 204602_at    | 131.48      | < 2.90E-44 |
| SH3BGRL3    | 221269_s_at  | 130.96      | 2.10E-39   |
| CSDE1       | 219939_s_at  | 122.51      | 1.40E-37   |
| PGK1        | 217356_s_at  | 118.89      | 1.63E-26   |
| YWHAZ       | 200638_s_at  | 116.85      | 7.26E-27   |
| CTSZ        | 210042_s_at  | 116.40      | 6.56E-34   |
| LMNA        | 1554600_s_at | 115.37      | 2.72E-43   |
| VIM         | 201426_s_at  | 114.53      | 1.08E-24   |

|          |             |        |            |
|----------|-------------|--------|------------|
| CYR61    | 210764_s_at | 110.03 | 1.71E-22   |
| CORO1C   | 222409_at   | 109.64 | 4.87E-27   |
| LIMA1    | 222457_s_at | 109.58 | 4.09E-29   |
| RPL18A   | 200869_at   | 108.07 | 1.99E-31   |
| TIMP3    | 201149_s_at | 107.11 | 1.26E-24   |
| ATP5G3   | 207507_s_at | 106.16 | 2.40E-34   |
| FTH1     | 200748_s_at | 105.44 | 2.38E-23   |
| PPIB     | 200968_s_at | 105.40 | 2.98E-26   |
| SKP1     | 207974_s_at | 104.29 | 8.31E-30   |
| C1QBP    | 208910_s_at | 102.99 | 3.51E-31   |
| UCHL1    | 201387_s_at | 100.94 | 9.19E-36   |
| IGFBP4   | 201508_at   | 99.46  | 4.80E-35   |
| HSPB1    | 201841_s_at | 98.62  | 2.06E-24   |
| UBE2S    | 202779_s_at | 97.77  | < 2.90E-44 |
| ERGIC1   | 224576_at   | 96.62  | 9.86E-36   |
| GNB2L1   | 200651_at   | 96.22  | 7.97E-23   |
| FOXD1    | 206307_s_at | 95.17  | < 2.90E-44 |
| KRTAP1-5 | 233533_at   | 94.58  | < 2.90E-44 |
| AXL      | 202686_s_at | 94.02  | 8.25E-26   |
| TXN      | 208864_s_at | 93.69  | 2.43E-28   |
| RNU86    | 211666_x_at | 92.21  | 2.16E-21   |
| RPS7     | 200082_s_at | 91.88  | 8.51E-29   |
| SEC61G   | 203484_at   | 90.39  | 8.97E-34   |
| PSMD6    | 202753_at   | 90.03  | 5.97E-33   |
| RAN      | 200750_s_at | 89.07  | 9.93E-24   |
| DDOST    | 208675_s_at | 87.21  | 9.45E-32   |
| NNMT     | 202238_s_at | 85.50  | 1.30E-11   |
| CAV1     | 203065_s_at | 82.58  | 2.40E-29   |
| RNASEK   | 224573_at   | 82.52  | 1.37E-27   |
| PALLD    | 200906_s_at | 82.47  | 1.42E-23   |
| PSMA3    | 201532_at   | 82.15  | 9.08E-30   |
| TMEM165  | 226825_s_at | 81.94  | 2.90E-44   |
| MRPS12   | 204331_s_at | 81.38  | 2.90E-44   |
| SUMO2    | 208739_x_at | 80.97  | 1.81E-31   |
| GAPDH    | 217398_x_at | 80.78  | 1.68E-27   |
| ALYREF   | 226319_s_at | 79.77  | 5.70E-44   |
| ID1      | 208937_s_at | 78.67  | 7.11E-39   |
| PSMB4    | 202243_s_at | 78.34  | 1.41E-30   |
| TRAM1    | 201399_s_at | 77.51  | 1.88E-33   |
| RAD23B   | 201222_s_at | 76.20  | 6.11E-35   |
| SELT     | 217811_at   | 74.77  | < 2.90E-44 |

|          |             |       |            |
|----------|-------------|-------|------------|
| RPLP0    | 214167_s_at | 74.52 | 2.37E-20   |
| FRMD6    | 225464_at   | 74.24 | 1.53E-22   |
| MARCKS   | 201670_s_at | 73.47 | 3.73E-25   |
| CTBP1    | 203392_s_at | 73.32 | 3.65E-27   |
| CALU     | 214845_s_at | 73.13 | < 2.90E-44 |
| SELM     | 226051_at   | 72.81 | 5.20E-29   |
| CLTA     | 204050_s_at | 72.19 | 8.75E-29   |
| OST4     | 224637_at   | 71.69 | 2.16E-32   |
| SET      | 213047_x_at | 71.66 | 6.68E-25   |
| TMED2    | 204427_s_at | 71.55 | < 2.90E-44 |
| ATP5H    | 210149_s_at | 70.08 | 2.15E-39   |
| HSP90B1  | 200598_s_at | 69.17 | 1.03E-24   |
| FTL      | 213187_x_at | 67.95 | 7.83E-21   |
| LGALS1   | 201105_at   | 67.65 | 3.65E-24   |
| KDELR3   | 207265_s_at | 67.28 | 1.09E-37   |
| EMP3     | 203729_at   | 66.47 | 4.32E-34   |
| PSMB3    | 201400_at   | 65.68 | 4.94E-31   |
| TPM4     | 209344_at   | 65.67 | 6.43E-29   |
| RER1     | 202296_s_at | 65.49 | 5.26E-36   |
| OSTC     | 223001_at   | 65.46 | 5.58E-22   |
| POLR2L   | 211730_s_at | 65.34 | 1.13E-35   |
| GREM1    | 218468_s_at | 65.14 | 6.23E-15   |
| C12orf75 | 225105_at   | 65.01 | 3.72E-24   |
| S100A6   | 217728_at   | 64.74 | 1.02E-29   |
| EIF4A1   | 201530_x_at | 64.58 | 8.00E-29   |
| VDAC1    | 212038_s_at | 64.17 | 3.22E-26   |
| CNN3     | 201445_at   | 63.76 | 6.16E-22   |
| SH3GLB1  | 209091_s_at | 63.65 | 6.17E-25   |
| PDIA6    | 216640_s_at | 63.53 | 1.05E-24   |
| CAPNS1   | 200001_at   | 62.86 | 5.20E-31   |
| GARS     | 208693_s_at | 62.83 | 3.14E-32   |
| MEST     | 202016_at   | 62.51 | 3.29E-21   |
| GLIPR1   | 226136_at   | 61.84 | 2.99E-31   |
| GPI      | 208308_s_at | 61.67 | 7.46E-29   |
| NACA     | 208635_x_at | 61.57 | 1.83E-20   |
| TIMP1    | 201666_at   | 61.34 | 2.92E-19   |
| ARF4     | 201096_s_at | 61.25 | 2.33E-23   |
| MGST1    | 231736_x_at | 60.97 | 4.54E-41   |
| ARMCX2   | 203404_at   | 60.90 | 5.67E-30   |
| FUT5     | 225304_s_at | 60.76 | 1.33E-29   |
| B2M      | 216231_s_at | 60.58 | 8.49E-21   |

|          |              |       |            |
|----------|--------------|-------|------------|
| LOXL2    | 202998_s_at  | 59.95 | 4.76E-23   |
| GSPT1    | 201912_s_at  | 59.94 | 3.05E-32   |
| SFT2D1   | 225850_at    | 59.39 | 6.19E-34   |
| TPI1     | 213011_s_at  | 59.30 | 1.19E-28   |
| P4HB     | 200656_s_at  | 59.10 | 3.43E-28   |
| HSPD1    | 200806_s_at  | 58.96 | 1.41E-38   |
| SERPINH1 | 207714_s_at  | 58.82 | 8.53E-26   |
| HSP90AB1 | 214359_s_at  | 58.81 | 2.32E-26   |
| POLR2E   | 213887_s_at  | 58.60 | < 2.90E-44 |
| ARF1     | 208750_s_at  | 58.25 | 5.31E-35   |
| LOXL1    | 203570_at    | 58.25 | 8.72E-21   |
| NDUFA13  | 220864_s_at  | 58.10 | 6.49E-31   |
| CD47     | 211075_s_at  | 58.07 | 1.52E-21   |
| PDIA3    | 208612_at    | 57.95 | 6.04E-27   |
| CKAP4    | 200998_s_at  | 57.83 | 3.45E-26   |
| RBMS1    | 209868_s_at  | 57.70 | 3.76E-39   |
| TKT      | 208699_x_at  | 57.51 | < 2.90E-44 |
| GSTO1    | 1557915_s_at | 57.30 | 2.27E-32   |
| PLIN3    | 202122_s_at  | 57.20 | 8.84E-35   |
| PSAP     | 200866_s_at  | 56.79 | 1.58E-28   |
| ILF2     | 200052_s_at  | 56.73 | 1.18E-28   |
| CALD1    | 201616_s_at  | 56.50 | 5.44E-26   |
| AP2S1    | 208074_s_at  | 56.41 | 5.12E-29   |
| EIF3C    | 210949_s_at  | 56.34 | 7.51E-25   |
| RPL11    | 200010_at    | 56.15 | 2.67E-23   |
| IGFBP6   | 203851_at    | 56.04 | 7.81E-29   |
| CLPTM1L  | 223020_at    | 56.02 | 2.13E-24   |
| SQLE     | 209218_at    | 56.01 | 4.86E-28   |
| PRR16    | 220014_at    | 55.94 | 2.90E-44   |
| NDUFB10  | 223112_s_at  | 55.75 | 2.23E-32   |
| HSPA5    | 211936_at    | 55.48 | 7.86E-29   |
| TSPO     | 202096_s_at  | 55.25 | 5.82E-32   |
| MDH1     | 200978_at    | 55.23 | 1.65E-27   |
| COPA     | 208684_at    | 55.20 | 1.60E-35   |
| TUBA1C   | 211750_x_at  | 54.53 | 6.28E-28   |
| GNAS     | 214548_x_at  | 54.52 | 4.54E-24   |
| PDGFC    | 222719_s_at  | 54.32 | 5.70E-44   |
| CD99     | 201028_s_at  | 54.22 | 2.09E-21   |
| PSMB1    | 200876_s_at  | 53.88 | 2.11E-25   |
| CFL2     | 224663_s_at  | 53.72 | 5.80E-28   |
| PON2     | 210830_s_at  | 53.67 | 4.96E-32   |

|          |             |       |            |
|----------|-------------|-------|------------|
| PRMT1    | 206445_s_at | 53.45 | 6.35E-36   |
| RPL36A   | 201406_at   | 53.39 | 2.54E-27   |
| THBS1    | 201109_s_at | 53.23 | 1.86E-15   |
| OLFML3   | 218162_at   | 53.14 | 1.35E-19   |
| EIF2S2   | 208726_s_at | 52.86 | 6.66E-26   |
| PCBP2    | 204031_s_at | 52.82 | 1.67E-27   |
| YWHAH    | 201020_at   | 52.73 | < 2.90E-44 |
| C4orf3   | 224602_at   | 52.72 | 8.24E-29   |
| SERPINE2 | 212190_at   | 52.65 | 9.03E-14   |
| EIF5     | 208290_s_at | 52.62 | 5.19E-32   |
| RPN2     | 208689_s_at | 52.61 | 3.68E-25   |
| HAPLN1   | 230204_at   | 52.61 | 5.04E-28   |
| APLP2    | 208703_s_at | 52.44 | 4.16E-24   |
| DENR     | 231896_s_at | 52.43 | 2.48E-24   |
| GLRX3    | 209080_x_at | 52.21 | 9.20E-38   |
| ENG      | 201809_s_at | 52.13 | 2.08E-25   |
| PTRF     | 208790_s_at | 51.91 | 1.05E-31   |
| HMOX1    | 203665_at   | 51.85 | 3.00E-36   |
| SLC16A3  | 202856_s_at | 51.82 | 1.73E-24   |
| SLC38A2  | 220924_s_at | 51.76 | 5.20E-27   |
| SEC11A   | 216274_s_at | 51.54 | 7.59E-29   |
| CHIC2    | 219492_at   | 51.44 | < 2.90E-44 |
| DDR2     | 225442_at   | 51.14 | 1.41E-24   |
| PABPC1   | 215157_x_at | 51.07 | 2.12E-24   |
| BNIP3L   | 221479_s_at | 51.06 | 8.92E-29   |
| TUSC3    | 213423_x_at | 50.87 | 9.83E-35   |
| SDF4     | 221972_s_at | 50.86 | 1.42E-30   |
| GRSF1    | 201520_s_at | 50.70 | 7.22E-34   |
| TUBB6    | 209191_at   | 50.65 | 2.16E-29   |
| NPR3     | 219789_at   | 50.58 | 5.22E-25   |
| TUBA1B   | 212639_x_at | 50.46 | 3.42E-26   |
| CTGF     | 209101_at   | 50.40 | 3.61E-16   |
| ADD3     | 201752_s_at | 49.39 | 1.68E-34   |
| CNPY2    | 209796_s_at | 49.11 | 5.45E-32   |
| ENPP2    | 210839_s_at | 48.82 | 3.42E-28   |
| ITFG1    | 221449_s_at | 48.81 | 2.77E-30   |
| TNPO1    | 209226_s_at | 48.73 | 4.19E-33   |
| PFDN5    | 210908_s_at | 48.59 | 1.91E-30   |
| ROMO1    | 224972_at   | 48.58 | 7.35E-27   |
| PSMD1    | 201198_s_at | 48.55 | 4.02E-36   |
| CALM1    | 200653_s_at | 48.52 | 1.58E-26   |

|              |             |       |            |
|--------------|-------------|-------|------------|
| CITED2       | 207980_s_at | 48.15 | 2.58E-32   |
| CTSB         | 227961_at   | 48.14 | 1.00E-23   |
| RPS4Y1       | 201909_at   | 48.07 | 1.19E-30   |
| TSPAN4       | 209264_s_at | 47.83 | < 2.90E-44 |
| ACTR2        | 200728_at   | 46.50 | 3.95E-23   |
| UAP1         | 209340_at   | 46.46 | 8.47E-27   |
| DYNLRB1      | 217918_at   | 46.44 | 7.95E-40   |
| LAMP1        | 201552_at   | 46.24 | 2.70E-18   |
| MYL9         | 201058_s_at | 45.88 | 3.13E-22   |
| SERPINE1     | 202627_s_at | 45.79 | 1.62E-20   |
| SET///SETP4  | 215780_s_at | 45.53 | 1.06E-25   |
| SLC25A6      | 212085_at   | 45.51 | 2.49E-18   |
| SCD          | 200832_s_at | 45.40 | 3.77E-24   |
| UBA1         | 200964_at   | 44.89 | 1.53E-25   |
| RPS9         | 217747_s_at | 44.82 | 1.22E-20   |
| ANXA1        | 201012_at   | 44.64 | 1.21E-21   |
| PEBP1        | 211941_s_at | 44.56 | 1.71E-29   |
| ATP5O        | 200818_at   | 44.30 | 4.73E-23   |
| TTC3         | 208663_s_at | 44.05 | 1.39E-20   |
| TALDO1       | 201463_s_at | 44.01 | 1.11E-25   |
| RABAC1       | 203136_at   | 43.92 | 1.03E-25   |
| GLRX         | 209276_s_at | 43.73 | < 2.90E-44 |
| ALDOA        | 200966_x_at | 43.70 | 3.21E-26   |
| C17orf76-AS1 | 225065_x_at | 43.53 | 1.24E-31   |
| S100A11      | 200660_at   | 43.37 | 3.89E-24   |
| TNFRSF11B    | 204933_s_at | 43.30 | 2.90E-44   |
| PTGR1        | 228824_s_at | 43.27 | < 2.90E-44 |
| UGP2         | 205480_s_at | 42.83 | 2.04E-21   |
| SNX2         | 202113_s_at | 42.79 | 1.80E-29   |
| MMP2         | 201069_at   | 42.78 | 1.21E-19   |
| YIPF5        | 221423_s_at | 42.74 | < 2.90E-44 |
| DNAJC15      | 218435_at   | 42.58 | 3.83E-25   |
| ESD          | 209009_at   | 42.55 | 1.77E-29   |
| ECI2         | 218025_s_at | 42.51 | 1.27E-29   |
| NME1         | 201577_at   | 42.36 | 7.88E-26   |
| UQCRFS1      | 208909_at   | 42.35 | 1.40E-27   |
| ERGIC2       | 218135_at   | 41.55 | 2.91E-29   |
| AP2M1        | 200613_at   | 41.37 | 9.82E-24   |
| UFD1L        | 209103_s_at | 41.36 | 5.81E-34   |
| DSTN         | 201021_s_at | 41.25 | 2.80E-22   |
| WIPI1        | 203827_at   | 41.17 | 1.36E-28   |



|          |              |       |          |
|----------|--------------|-------|----------|
| VTI1B    | 209452_s_at  | 40.94 | 4.19E-31 |
| COL1A1   | 202310_s_at  | 40.78 | 1.70E-17 |
| CCNB1    | 214710_s_at  | 40.76 | 1.17E-23 |
| CA12     | 204508_s_at  | 40.73 | 2.12E-36 |
| ARL6IP5  | 200760_s_at  | 40.71 | 8.35E-26 |
| CRTAP    | 1554464_a_at | 40.57 | 1.48E-36 |
| ASNS     | 205047_s_at  | 40.47 | 1.57E-24 |
| SNORA29  | 208778_s_at  | 40.45 | 2.51E-27 |
| C20orf24 | 224376_s_at  | 40.45 | 1.46E-31 |
| RNH1     | 206050_s_at  | 40.30 | 1.08E-31 |
| CCT2     | 201946_s_at  | 40.16 | 2.93E-40 |
| PRKAR1A  | 200605_s_at  | 40.10 | 7.49E-22 |
| APP      | 214953_s_at  | 39.92 | 5.78E-25 |
| DAD1     | 200046_at    | 39.78 | 1.50E-23 |
| ZFAS1    | 226835_s_at  | 39.75 | 3.51E-27 |
| PKM      | 201251_at    | 39.68 | 7.68E-28 |
| PRDX5    | 1560587_s_at | 39.65 | 4.01E-22 |
| ANXA7    | 209860_s_at  | 39.63 | 8.26E-26 |
| ENAH     | 222433_at    | 39.49 | 1.49E-20 |
| HDDC2    | 203259_s_at  | 39.47 | 2.75E-28 |
| SYNC     | 221276_s_at  | 39.46 | 5.45E-25 |
| SDC2     | 212154_at    | 39.31 | 1.13E-30 |
| PSMD8    | 200820_at    | 39.22 | 9.92E-35 |
| DBI      | 211070_x_at  | 39.20 | 6.83E-32 |
| CHMP2A   | 202121_s_at  | 39.18 | 8.54E-31 |
| EPDR1    | 223253_at    | 39.09 | 5.05E-25 |
| FERMT2   | 209209_s_at  | 39.07 | 1.40E-43 |
| PAPSS1   | 209043_at    | 39.05 | 3.84E-28 |
| CST3     | 201360_at    | 39.01 | 8.66E-25 |
| TMEM167A | 226276_at    | 38.72 | 7.57E-19 |
| LARP6    | 236565_s_at  | 38.70 | 6.13E-29 |
| TM9SF2   | 201078_at    | 38.67 | 2.29E-23 |
| AK1      | 202587_s_at  | 38.66 | 2.84E-32 |
| PRDX3    | 201619_at    | 38.47 | 2.51E-27 |
| GHITM    | 209249_s_at  | 38.26 | 4.43E-28 |
| ATP6V1D  | 208899_x_at  | 38.24 | 4.96E-29 |
| ACTG1    | 211995_x_at  | 38.18 | 6.47E-24 |
| TRAM2    | 202369_s_at  | 38.05 | 3.96E-30 |
| NARR     | 1555630_a_at | 38.02 | 3.04E-29 |
| UQCRC1   | 201903_at    | 37.85 | 1.38E-29 |
| METAP2   | 209861_s_at  | 37.76 | 1.47E-25 |

|          |             |       |          |
|----------|-------------|-------|----------|
| PAWR     | 204004_at   | 37.53 | 1.88E-28 |
| GABARAP  | 200645_at   | 37.38 | 1.28E-27 |
| PPP1R3C  | 204284_at   | 37.30 | 5.33E-23 |
| OCIAD1   | 223010_s_at | 37.28 | 1.78E-38 |
| RAB9A    | 221808_at   | 37.26 | 5.93E-32 |
| FHL2     | 202949_s_at | 37.19 | 2.16E-18 |
| ARL1     | 201659_s_at | 37.16 | 1.63E-26 |
| LRRC59   | 222231_s_at | 37.14 | 2.75E-25 |
| TGFBI    | 201506_at   | 36.95 | 2.01E-18 |
| SNRPD2   | 200826_at   | 36.90 | 5.03E-27 |
| DHX15    | 201386_s_at | 36.77 | 8.16E-25 |
| RABEP1   | 225092_at   | 36.76 | 6.57E-26 |
| PSMC3    | 201267_s_at | 36.72 | 1.63E-30 |
| SPCS2    | 201239_s_at | 36.71 | 6.46E-23 |
| RRAGA    | 201628_s_at | 36.71 | 3.31E-33 |
| PPP1R7   | 213465_s_at | 36.69 | 5.73E-28 |
| ATP5F1   | 211755_s_at | 36.67 | 1.15E-21 |
| CSTB     | 201201_at   | 36.67 | 1.02E-21 |
| SLC25A3  | 200030_s_at | 36.58 | 7.27E-26 |
| GATC     | 201698_s_at | 36.49 | 1.69E-22 |
| CNOT7    | 218250_s_at | 36.35 | 1.88E-32 |
| MIR612   | 224566_at   | 36.35 | 3.68E-23 |
| SULF1    | 212344_at   | 36.35 | 5.55E-18 |
| CRIM1    | 202551_s_at | 36.31 | 4.56E-30 |
| TSPAN3   | 200973_s_at | 36.30 | 5.80E-31 |
| COX2     | 1553569_at  | 36.29 | 5.75E-18 |
| CSNK2B   | 201390_s_at | 36.29 | 2.62E-23 |
| PPP2CA   | 208652_at   | 36.15 | 1.31E-29 |
| TFPI2    | 209278_s_at | 36.11 | 6.98E-18 |
| RHOB     | 212099_at   | 35.90 | 1.09E-26 |
| GANAB    | 211934_x_at | 35.86 | 2.90E-44 |
| TCEB2    | 200085_s_at | 35.85 | 2.63E-25 |
| CPNE3    | 202119_s_at | 35.75 | 7.87E-25 |
| YWHAQ    | 200693_at   | 35.64 | 9.35E-28 |
| TMEM126B | 221622_s_at | 35.61 | 8.86E-30 |
| PPP6C    | 206174_s_at | 35.50 | 3.64E-41 |
| EFEMP1   | 201842_s_at | 35.49 | 2.36E-08 |
| RPL29    | 200823_x_at | 35.45 | 1.89E-20 |
| HINT1    | 207721_x_at | 35.44 | 6.76E-28 |
| SLC25A46 | 212833_at   | 35.44 | 1.57E-27 |
| COL5A2   | 221730_at   | 35.42 | 9.19E-12 |

|           |              |       |            |
|-----------|--------------|-------|------------|
| IPO7      | 200993_at    | 35.39 | 4.53E-29   |
| RHOC      | 200885_at    | 35.38 | 3.44E-30   |
| ATP5G2    | 208764_s_at  | 35.37 | 5.89E-27   |
| FIS1      | 218034_at    | 35.27 | 5.98E-28   |
| EIF3M     | 202232_s_at  | 35.21 | 1.09E-24   |
| CHP1      | 214665_s_at  | 35.18 | 3.87E-35   |
| MSN       | 200600_at    | 35.14 | 3.01E-27   |
| GALNT1    | 1568618_a_at | 35.07 | 2.72E-17   |
| LOC550643 | 225029_at    | 35.04 | 5.72E-38   |
| CDH11     | 207172_s_at  | 34.90 | 1.41E-24   |
| CCDC92    | 218175_at    | 34.85 | 1.11E-28   |
| STC2      | 203438_at    | 34.76 | 3.76E-33   |
| UCHL3     | 204616_at    | 34.76 | 1.04E-29   |
| BTF3      | 208517_x_at  | 34.75 | 5.33E-23   |
| CAPZB     | 201950_x_at  | 34.64 | 1.56E-32   |
| ARPC3     | 208736_at    | 34.61 | 1.07E-25   |
| ATP5B     | 201322_at    | 34.53 | 3.03E-27   |
| VEGFC     | 209946_at    | 34.52 | 1.12E-23   |
| RAB14     | 200927_s_at  | 34.48 | 2.59E-35   |
| NRBF2     | 223650_s_at  | 34.37 | 6.55E-32   |
| RCN3      | 61734_at     | 34.36 | 3.75E-22   |
| TFDP1     | 212330_at    | 34.35 | 1.29E-31   |
| SOD1      | 200642_at    | 34.34 | 5.55E-28   |
| CAPRIN1   | 200723_s_at  | 34.25 | 9.09E-26   |
| IGFBP2    | 202718_at    | 34.00 | 5.57E-17   |
| PTGES3    | 200627_at    | 33.81 | 2.80E-24   |
| SARS      | 200802_at    | 33.80 | 3.30E-33   |
| REEP5     | 208872_s_at  | 33.68 | 3.55E-36   |
| MRPL37    | 222993_at    | 33.68 | 5.90E-37   |
| ERGIC3    | 216032_s_at  | 33.50 | 3.29E-25   |
| S100A13   | 202598_at    | 33.47 | 3.72E-24   |
| EIF1      | 212227_x_at  | 33.46 | 1.24E-25   |
| POSTN     | 210809_s_at  | 33.46 | 2.44E-06   |
| RAB22A    | 218360_at    | 33.42 | 9.69E-31   |
| PXDN      | 212013_at    | 33.37 | 8.14E-23   |
| EVA1A     | 227828_s_at  | 33.29 | < 2.90E-44 |
| MIR100HG  | 225381_at    | 33.28 | 1.86E-22   |
| RRAS2     | 208456_s_at  | 33.23 | < 2.90E-44 |
| ANPEP     | 202888_s_at  | 33.14 | 8.21E-22   |
| SRSF3     | 202899_s_at  | 33.13 | 3.75E-30   |
| LDHA      | 200650_s_at  | 33.08 | 1.16E-21   |

|           |              |       |            |
|-----------|--------------|-------|------------|
| ARPC1A    | 200950_at    | 32.96 | 3.83E-25   |
| KDEL2     | 200700_s_at  | 32.95 | 1.55E-20   |
| WDR26     | 218107_at    | 32.89 | 1.20E-28   |
| FLNA      | 213746_s_at  | 32.81 | 3.40E-27   |
| LSM7      | 204559_s_at  | 32.68 | 4.72E-27   |
| VIMP      | 223209_s_at  | 32.68 | 1.73E-26   |
| RANBP9    | 202583_s_at  | 32.64 | < 2.90E-44 |
| RGMB      | 226989_at    | 32.56 | 1.22E-29   |
| GALNT10   | 212256_at    | 32.55 | 1.03E-20   |
| PGD       | 201118_at    | 32.49 | 2.88E-41   |
| PDCD6     | 203415_at    | 32.47 | 5.61E-29   |
| PLP2      | 201136_at    | 32.45 | 1.50E-30   |
| BNIP3     | 201848_s_at  | 32.39 | 6.39E-35   |
| RPL28     | 200003_s_at  | 32.36 | 8.80E-18   |
| CRNDE     | 238022_at    | 32.26 | < 2.90E-44 |
| SBDS      | 1554089_s_at | 32.23 | 4.34E-30   |
| FAM50A    | 203262_s_at  | 32.17 | 1.33E-31   |
| CCDC80    | 225241_at    | 32.08 | 1.17E-15   |
| PRDX4     | 201923_at    | 32.04 | 5.98E-18   |
| SURF4     | 222978_at    | 32.03 | 6.36E-27   |
| C14orf119 | 223060_at    | 31.96 | 8.20E-29   |
| AMFR      | 202203_s_at  | 31.95 | 1.11E-42   |
| ATP6AP2   | 201444_s_at  | 31.95 | 6.82E-39   |
| BLOC1S6   | 222826_at    | 31.89 | 6.75E-22   |
| HNRNPC    | 200751_s_at  | 31.87 | 2.00E-39   |
| COX6A1    | 200925_at    | 31.86 | 3.36E-24   |
| RHOBTB3   | 202975_s_at  | 31.83 | 4.88E-31   |
| CLIC1     | 208659_at    | 31.81 | 3.26E-24   |
| RCAN1     | 208370_s_at  | 31.80 | 3.13E-14   |
| GAS6      | 202177_at    | 31.72 | 1.34E-20   |
| IARS      | 204744_s_at  | 31.62 | 1.09E-28   |
| KDEL1     | 200922_at    | 31.61 | < 2.90E-44 |
| PSMB7     | 200786_at    | 31.59 | 5.16E-25   |
| SYNJ2     | 212828_at    | 31.49 | 2.90E-28   |
| SPCS1     | 217927_at    | 31.37 | 6.73E-23   |
| TUBB4B    | 208977_x_at  | 31.31 | 4.71E-27   |
| FST       | 204948_s_at  | 31.28 | 7.20E-24   |
| AKAP2     | 202759_s_at  | 31.22 | 1.17E-33   |
| JAK1      | 201648_at    | 31.13 | 2.20E-21   |
| HNRNPDL   | 209067_s_at  | 31.12 | 7.54E-24   |
| ANXA6     | 200982_s_at  | 31.11 | 2.29E-30   |

|          |             |       |            |
|----------|-------------|-------|------------|
| HDGFRP3  | 216693_x_at | 30.98 | 2.44E-35   |
| ANXA2    | 210427_x_at | 30.98 | 1.53E-20   |
| NDUFV2   | 202941_at   | 30.85 | 1.20E-37   |
| ETFA     | 201931_at   | 30.76 | 1.15E-20   |
| FKBP7    | 224002_s_at | 30.76 | 7.34E-26   |
| TXNRD1   | 201266_at   | 30.75 | 5.55E-26   |
| STT3A    | 202223_at   | 30.74 | 1.73E-31   |
| PRMT2    | 228725_x_at | 30.65 | 3.18E-35   |
| SLIRP    | 221434_s_at | 30.52 | 4.41E-23   |
| RBM3     | 208319_s_at | 30.47 | 6.40E-25   |
| AKR1B1   | 201272_at   | 30.47 | 8.85E-35   |
| DAB2     | 201279_s_at | 30.44 | 5.49E-34   |
| ZC3H15   | 201593_s_at | 30.41 | 6.81E-28   |
| PRDX1    | 208680_at   | 30.40 | 1.05E-26   |
| EMC7     | 217898_at   | 30.40 | 3.51E-28   |
| NT5DC2   | 218051_s_at | 30.39 | 5.40E-33   |
| FBN1     | 202765_s_at | 30.36 | 3.14E-30   |
| BAX      | 211833_s_at | 30.35 | < 2.90E-44 |
| SRM      | 201516_at   | 30.33 | 5.63E-34   |
| CDK4     | 202246_s_at | 30.31 | 5.92E-27   |
| KIAA0368 | 212428_at   | 30.26 | 8.24E-30   |
| ANXA5    | 200782_at   | 30.20 | 1.68E-21   |
| KLC1     | 212878_s_at | 30.16 | 5.11E-35   |
| RPL4     | 211710_x_at | 30.14 | 3.87E-21   |
| SRI      | 208921_s_at | 30.11 | 2.81E-22   |
| MSRB2    | 218773_s_at | 30.11 | 1.28E-25   |
| MORF4L1  | 221381_s_at | 30.00 | 3.97E-24   |
| NDUFS8   | 203190_at   | 29.98 | 7.28E-22   |
| PDLIM4   | 211564_s_at | 29.97 | 8.89E-29   |
| RRM2     | 209773_s_at | 29.97 | 1.02E-15   |
| SCP2     | 201339_s_at | 29.94 | 8.97E-24   |
| PFKP     | 201037_at   | 29.84 | 2.98E-28   |
| COPE     | 201264_at   | 29.84 | 5.44E-28   |
| SAR1A    | 201543_s_at | 29.83 | 2.87E-32   |
| HEBP2    | 203430_at   | 29.81 | 7.47E-25   |
| DYNLL1   | 200703_at   | 29.78 | 5.00E-26   |
| ATP5C1   | 205711_x_at | 29.76 | 1.91E-22   |
| GUK1     | 200075_s_at | 29.76 | 1.09E-27   |
| BUB3     | 201457_x_at | 29.73 | 8.57E-26   |
| VAMP7    | 202829_s_at | 29.71 | 2.21E-18   |
| APEX1    | 210027_s_at | 29.67 | 1.30E-23   |

|              |             |       |          |
|--------------|-------------|-------|----------|
| GLB1         | 201576_s_at | 29.65 | 4.99E-26 |
| TNC          | 201645_at   | 29.57 | 8.91E-13 |
| SSB          | 201138_s_at | 29.53 | 6.11E-41 |
| HAT1         | 203138_at   | 29.51 | 6.97E-25 |
| ESYT2        | 224699_s_at | 29.46 | 6.96E-30 |
| EMC4         | 223043_at   | 29.45 | 2.03E-24 |
| DDAH1        | 209094_at   | 29.45 | 7.61E-21 |
| DPYSL3       | 201430_s_at | 29.44 | 8.45E-26 |
| TBCB         | 216194_s_at | 29.44 | 4.17E-26 |
| HAS2         | 230372_at   | 29.41 | 1.17E-15 |
| LOC101060363 | 212661_x_at | 29.40 | 2.05E-24 |
| PTBP1        | 216306_x_at | 29.37 | 7.66E-35 |
| TOMM5        | 228053_s_at | 29.37 | 1.47E-30 |
| TMEM126A     | 223334_at   | 29.31 | 1.67E-22 |
| HSPA9        | 200691_s_at | 29.28 | 2.47E-25 |
| EEF2         | 204102_s_at | 29.26 | 5.48E-21 |
| YIF1B        | 226437_at   | 29.23 | 3.54E-41 |
| PFN2         | 204992_s_at | 29.20 | 3.08E-24 |
| DEGS1        | 207431_s_at | 29.13 | 2.16E-28 |
| PTPLAD1      | 222404_x_at | 29.10 | 6.42E-21 |
| COMT         | 208817_at   | 29.06 | 3.13E-32 |
| RBBP4        | 210371_s_at | 29.03 | 3.51E-28 |
| TUBB2A       | 204141_at   | 29.01 | 4.76E-14 |
| CCNDBP1      | 223084_s_at | 28.95 | 2.22E-27 |
| PRELID1      | 223032_x_at | 28.91 | 1.20E-31 |
| HOXA10       | 214651_s_at | 28.86 | 1.27E-24 |
| UQCRC2       | 200883_at   | 28.84 | 6.29E-23 |
| ALPK2        | 228367_at   | 28.82 | 5.35E-15 |
| PPP1R18      | 224927_at   | 28.82 | 3.24E-31 |
| CHI3L1       | 209395_at   | 28.76 | 5.67E-11 |
| GNB1         | 200745_s_at | 28.74 | 1.23E-21 |
| COPS2        | 202467_s_at | 28.72 | 1.57E-24 |
| FDFT1        | 210950_s_at | 28.68 | 6.66E-34 |
| CDC37        | 209953_s_at | 28.67 | 4.42E-39 |
| PPIA         | 211765_x_at | 28.66 | 2.49E-25 |
| CRYAB        | 209283_at   | 28.65 | 1.94E-40 |
| PTPLA        | 219654_at   | 28.65 | 2.43E-27 |
| PRC1         | 218009_s_at | 28.63 | 4.25E-22 |
| YAP1         | 224895_at   | 28.60 | 9.75E-30 |
| MTDH         | 212251_at   | 28.53 | 2.34E-25 |
| AKIRIN2      | 223145_s_at | 28.48 | 3.55E-33 |

|            |             |       |            |
|------------|-------------|-------|------------|
| ADAMTS1    | 222162_s_at | 28.42 | 8.89E-16   |
| LAMTOR5    | 202300_at   | 28.41 | 1.56E-27   |
| RPLP2      | 200909_s_at | 28.38 | 1.84E-21   |
| ADK        | 204119_s_at | 28.35 | 2.57E-37   |
| CRK        | 202224_at   | 28.33 | 2.81E-33   |
| ATP2A2     | 209186_at   | 28.29 | 1.98E-31   |
| EXT1       | 201995_at   | 28.28 | 5.60E-24   |
| VKORC1     | 217949_s_at | 28.27 | 1.41E-24   |
| CAP1       | 200625_s_at | 28.27 | 2.72E-27   |
| CNBP       | 206158_s_at | 28.26 | 6.49E-22   |
| GNA11      | 204248_at   | 28.24 | 2.90E-44   |
| ADIRF      | 203571_s_at | 28.23 | 5.36E-29   |
| ATP6V0B    | 200078_s_at | 28.21 | 1.22E-35   |
| BAG2       | 209406_at   | 28.18 | 1.81E-28   |
| RBPJ       | 207785_s_at | 28.17 | 1.79E-34   |
| TMEM189    | 201002_s_at | 28.16 | 6.87E-35   |
| DARS       | 201623_s_at | 28.13 | 3.24E-29   |
| MAP4K4     | 206571_s_at | 28.11 | 1.54E-23   |
| GADD45GIP1 | 212891_s_at | 27.96 | 2.38E-39   |
| TMCO3      | 226050_at   | 27.76 | 2.35E-21   |
| RPL14      | 200074_s_at | 27.75 | 3.73E-22   |
| LAMC1      | 200770_s_at | 27.74 | 5.31E-34   |
| RCN2       | 201485_s_at | 27.65 | 4.00E-24   |
| MICAL2     | 212472_at   | 27.62 | 1.77E-19   |
| DNAJB11    | 223054_at   | 27.61 | 1.77E-26   |
| C19orf70   | 225823_at   | 27.61 | 5.82E-33   |
| MRPL17     | 222216_s_at | 27.60 | 2.19E-28   |
| LSM4       | 202736_s_at | 27.50 | < 2.90E-44 |
| CYP1B1     | 202436_s_at | 27.47 | 3.90E-08   |
| PTGES      | 210367_s_at | 27.46 | 5.02E-36   |
| FKBP10     | 219249_s_at | 27.44 | < 2.90E-44 |
| SGCB       | 205120_s_at | 27.43 | 2.97E-22   |
| KPNA2      | 211762_s_at | 27.40 | 3.50E-21   |
| PARVA      | 222454_s_at | 27.38 | 3.30E-33   |
| WDR1       | 200611_s_at | 27.36 | 4.62E-23   |
| PGLS       | 218388_at   | 27.34 | 5.60E-25   |
| BCL2L2     | 201544_x_at | 27.33 | 4.13E-22   |
| AKR7A2     | 202139_at   | 27.26 | 3.32E-26   |
| ACAA2      | 202003_s_at | 27.23 | 2.61E-27   |
| PDIA5      | 203857_s_at | 27.20 | 4.59E-24   |
| ACLY       | 210337_s_at | 27.18 | < 2.90E-44 |

|           |             |       |            |
|-----------|-------------|-------|------------|
| BTG1      | 200920_s_at | 27.16 | 6.05E-23   |
| NEDD8     | 201840_at   | 27.16 | 9.06E-36   |
| ITGAE     | 205055_at   | 27.16 | 1.88E-26   |
| LINC00152 | 225799_at   | 27.16 | 5.89E-17   |
| FLII      | 222065_s_at | 27.15 | 3.09E-31   |
| HYPK      | 224625_x_at | 27.12 | 2.61E-24   |
| CCND1     | 208711_s_at | 27.05 | 3.01E-20   |
| NUPR1     | 209230_s_at | 27.05 | 6.13E-37   |
| ZNF207    | 200828_s_at | 27.04 | 3.50E-32   |
| PTP4A1    | 200730_s_at | 27.01 | < 2.90E-44 |
| TPT1      | 216520_s_at | 26.95 | 3.20E-18   |
| TCEA1     | 216241_s_at | 26.95 | 2.75E-25   |
| MALSU1    | 226386_at   | 26.93 | 1.35E-29   |
| TM9SF3    | 222399_s_at | 26.92 | 5.98E-21   |
| RRAGC     | 222514_at   | 26.85 | 1.59E-30   |
| DESI2     | 212371_at   | 26.83 | 1.69E-27   |
| LEPR      | 211354_s_at | 26.82 | < 2.90E-44 |
| ORMDL2    | 218556_at   | 26.82 | 1.19E-26   |
| TTC37     | 203048_s_at | 26.82 | 4.67E-36   |
| SDHB      | 202675_at   | 26.82 | 6.10E-33   |
| PCOLCE    | 202465_at   | 26.81 | 2.16E-23   |
| SAE1      | 217946_s_at | 26.81 | 2.22E-35   |
| COPG1     | 217749_at   | 26.76 | 6.11E-38   |
| H2AFZ     | 200853_at   | 26.72 | 4.08E-21   |
| TP53I3    | 210609_s_at | 26.72 | 2.81E-28   |
| DLD       | 209095_at   | 26.67 | 1.64E-21   |
| TGOLN2    | 212040_at   | 26.67 | 2.61E-26   |
| ACTR3     | 200996_at   | 26.64 | 6.72E-19   |
| TFRC      | 207332_s_at | 26.56 | 5.66E-18   |
| SUB1      | 214512_s_at | 26.54 | 3.90E-32   |
| MAPK1     | 212271_at   | 26.44 | 3.37E-33   |
| DDX1      | 201241_at   | 26.38 | 2.17E-25   |
| ATP6V0E1  | 200096_s_at | 26.38 | 5.41E-29   |
| RPL10A    | 200036_s_at | 26.34 | 5.65E-20   |
| DPH3      | 225200_at   | 26.29 | 6.66E-23   |
| PSMA1     | 210759_s_at | 26.26 | 2.45E-25   |
| ELOVL1    | 218028_at   | 26.25 | < 2.90E-44 |
| RANBP1    | 202483_s_at | 26.15 | 2.42E-28   |
| RRAS      | 212647_at   | 26.10 | 9.17E-29   |
| MYOF      | 211864_s_at | 26.04 | 1.96E-23   |
| MIR3656   | 217959_s_at | 26.03 | 5.73E-25   |



|         |              |       |            |
|---------|--------------|-------|------------|
| COPZ2   | 219561_at    | 26.01 | 7.16E-21   |
| CCDC53  | 218628_at    | 26.00 | 1.55E-37   |
| PABPC4  | 201064_s_at  | 25.97 | 1.35E-27   |
| NT5E    | 203939_at    | 25.95 | 3.93E-18   |
| UBE2M   | 203109_at    | 25.92 | 2.02E-37   |
| MTX2    | 203517_at    | 25.89 | 1.05E-29   |
| TGFB1   | 203085_s_at  | 25.87 | < 2.90E-44 |
| CD44    | 212063_at    | 25.87 | 6.36E-16   |
| SLC25A1 | 210010_s_at  | 25.84 | 8.70E-44   |
| EXT2    | 202012_s_at  | 25.80 | 7.40E-34   |
| XRCC5   | 208643_s_at  | 25.78 | 1.49E-23   |
| CHMP3   | 222437_s_at  | 25.78 | 1.45E-25   |
| FXYD5   | 218084_x_at  | 25.76 | 1.29E-28   |
| NRG1    | 206343_s_at  | 25.75 | < 2.90E-44 |
| SESTD1  | 226763_at    | 25.72 | 1.73E-32   |
| SUMO1   | 208761_s_at  | 25.59 | 5.83E-22   |
| GDI2    | 200008_s_at  | 25.59 | 2.90E-44   |
| FGF7    | 205782_at    | 25.57 | 5.81E-40   |
| ZNF281  | 218401_s_at  | 25.55 | 3.53E-30   |
| PHB2    | 201600_at    | 25.54 | 2.27E-23   |
| YME1L1  | 201351_s_at  | 25.53 | 1.09E-23   |
| RAB1A   | 207791_s_at  | 25.50 | 5.96E-22   |
| RPL36   | 219762_s_at  | 25.47 | 1.99E-22   |
| SNX9    | 223028_s_at  | 25.45 | 2.47E-31   |
| TIMM23  | 218119_at    | 25.43 | < 2.90E-44 |
| PCBP1   | 208620_at    | 25.39 | 6.35E-25   |
| TOMM20  | 212773_s_at  | 25.37 | 1.49E-24   |
| NDUFB4  | 218226_s_at  | 25.34 | 4.79E-30   |
| SRSF1   | 208863_s_at  | 25.33 | 5.57E-29   |
| DLC1    | 224822_at    | 25.31 | 2.89E-25   |
| TPM2    | 204083_s_at  | 25.31 | 4.09E-18   |
| TAGLN2  | 210978_s_at  | 25.28 | < 2.90E-44 |
| POLR2K  | 202635_s_at  | 25.27 | 3.77E-23   |
| SEC63   | 201914_s_at  | 25.21 | 1.78E-25   |
| SNX3    | 208781_x_at  | 25.19 | 8.22E-27   |
| PCYOX1  | 203803_at    | 25.18 | 8.08E-28   |
| SIX1    | 228347_at    | 25.17 | 1.89E-41   |
| EIF3D   | 200005_at    | 25.16 | 1.19E-22   |
| FOXC1   | 1553613_s_at | 25.16 | 2.18E-19   |
| SSH1    | 221752_at    | 25.10 | 1.28E-27   |
| TPD52L2 | 201379_s_at  | 25.09 | 1.13E-32   |

|              |             |       |            |
|--------------|-------------|-------|------------|
| PSMB6        | 208827_at   | 25.05 | 1.01E-27   |
| COPS7A       | 209029_at   | 25.04 | 3.97E-35   |
| PSMD12       | 202352_s_at | 25.01 | 1.46E-29   |
| APMAP        | 206656_s_at | 24.99 | 6.15E-25   |
| VBP1         | 201472_at   | 24.96 | 1.75E-22   |
| C7orf73      | 224752_at   | 24.95 | 5.57E-29   |
| UBE2L3       | 200682_s_at | 24.94 | 8.77E-27   |
| PDIA4        | 211048_s_at | 24.93 | 6.89E-25   |
| CXCL12       | 209687_at   | 24.90 | 9.90E-10   |
| NQO2         | 203814_s_at | 24.90 | 1.25E-35   |
| ATIC         | 208758_at   | 24.89 | 5.56E-30   |
| INSIG1       | 201627_s_at | 24.89 | < 2.90E-44 |
| TRMT112      | 217774_s_at | 24.89 | 4.09E-26   |
| ENDOD1       | 212573_at   | 24.87 | 8.01E-23   |
| TMBIM6       | 200803_s_at | 24.86 | 1.92E-27   |
| RTCA         | 203594_at   | 24.85 | 1.11E-25   |
| VCAN         | 211571_s_at | 24.79 | 3.12E-23   |
| RND3         | 212724_at   | 24.73 | 1.55E-24   |
| MCTS1        | 218163_at   | 24.69 | 5.92E-19   |
| SHMT2        | 214437_s_at | 24.65 | 2.04E-31   |
| H3F3A        | 209069_s_at | 24.65 | 3.91E-26   |
| GALNT2       | 217788_s_at | 24.65 | 1.24E-22   |
| KRTAP1-1     | 220976_s_at | 24.61 | < 2.90E-44 |
| FTSJ1        | 205324_s_at | 24.57 | 1.92E-37   |
| CSE1L        | 201112_s_at | 24.50 | 6.11E-21   |
| GNAI3        | 201180_s_at | 24.42 | 1.77E-21   |
| CDK7         | 211297_s_at | 24.39 | 1.17E-23   |
| SYNCRIP      | 217832_at   | 24.39 | 4.45E-27   |
| TEAD1        | 224955_at   | 24.35 | 5.94E-26   |
| ACOT13       | 204565_at   | 24.35 | < 2.90E-44 |
| MIR21        | 224917_at   | 24.31 | 4.62E-18   |
| TRIM16       | 204341_at   | 24.27 | 2.68E-39   |
| MTCH2        | 217772_s_at | 24.26 | 2.26E-27   |
| GYG1         | 201554_x_at | 24.24 | 6.67E-27   |
| MED21        | 209362_at   | 24.24 | 4.83E-21   |
| INO80C       | 229582_at   | 24.20 | 3.63E-32   |
| POLR1D       | 218258_at   | 24.19 | 1.80E-25   |
| FIBP         | 202041_s_at | 24.18 | 1.69E-32   |
| ZNHIT3       | 212544_at   | 24.18 | 2.47E-27   |
| RPL18        | 200022_at   | 24.15 | 2.06E-20   |
| LOC101060541 | 222443_s_at | 24.12 | 1.77E-30   |

|          |              |       |            |
|----------|--------------|-------|------------|
| SSBP1    | 202591_s_at  | 24.11 | 1.55E-23   |
| USP14    | 201671_x_at  | 24.08 | 1.17E-35   |
| TPM3     | 222976_s_at  | 24.06 | 1.66E-24   |
| CRIP1    | 205081_at    | 23.96 | 2.18E-15   |
| KRT7     | 209016_s_at  | 23.95 | 6.59E-13   |
| COL12A1  | 231879_at    | 23.94 | 1.35E-38   |
| BDNF     | 206382_s_at  | 23.88 | 1.49E-34   |
| PAPPA    | 224942_at    | 23.88 | < 2.90E-44 |
| GPX8     | 227628_at    | 23.87 | 2.29E-18   |
| COPS8    | 202143_s_at  | 23.78 | 8.04E-41   |
| TGFB2    | 208944_at    | 23.78 | 1.29E-16   |
| ITGBL1   | 1557080_s_at | 23.78 | 2.62E-09   |
| PSMD11   | 208777_s_at  | 23.77 | 2.83E-34   |
| PITRM1   | 205273_s_at  | 23.77 | 4.28E-29   |
| ZYX      | 200808_s_at  | 23.75 | 2.58E-27   |
| EIF3F    | 200023_s_at  | 23.75 | 5.09E-22   |
| C1orf43  | 223034_s_at  | 23.71 | 2.01E-24   |
| CDC42EP3 | 209286_at    | 23.67 | 2.33E-29   |
| H2AFX    | 205436_s_at  | 23.61 | 1.49E-22   |
| PSMB2    | 200039_s_at  | 23.59 | 1.88E-25   |
| MAP1B    | 226084_at    | 23.58 | 3.89E-18   |
| ATP6V1G2 | 200041_s_at  | 23.57 | 4.12E-20   |
| ZDHHC4   | 220261_s_at  | 23.54 | 2.04E-35   |
| CXXC5    | 224516_s_at  | 23.47 | 1.12E-19   |
| HN1      | 217755_at    | 23.46 | 7.64E-31   |
| TMEM59   | 200620_at    | 23.46 | 5.47E-24   |
| MYL6B    | 204173_at    | 23.45 | 4.01E-31   |
| LAPTM4B  | 1554679_a_at | 23.44 | < 2.90E-44 |
| RBX1     | 218117_at    | 23.42 | 2.47E-32   |
| ALKBH7   | 223318_s_at  | 23.38 | 1.53E-28   |
| ADAMTS2  | 226311_at    | 23.37 | 8.15E-13   |
| GTF2H5   | 213357_at    | 23.33 | 2.58E-28   |
| RASA1    | 210621_s_at  | 23.32 | 5.33E-27   |
| VDAC3    | 208846_s_at  | 23.30 | 4.83E-25   |
| METTL2A  | 225253_s_at  | 23.30 | 1.46E-31   |
| HSPA4    | 211015_s_at  | 23.30 | 1.22E-37   |
| H2AFV    | 202487_s_at  | 23.27 | 5.09E-26   |
| LEPROT   | 202377_at    | 23.25 | 4.05E-20   |
| TMEM70   | 219449_s_at  | 23.22 | 1.42E-23   |
| SPOP     | 204640_s_at  | 23.16 | 1.13E-32   |
| ATP6V1B2 | 201089_at    | 23.15 | 1.12E-30   |

|              |              |       |            |
|--------------|--------------|-------|------------|
| MRPS24       | 224948_at    | 23.12 | 1.89E-27   |
| SMAD7        | 204790_at    | 23.12 | 2.28E-26   |
| TMEM14B      | 221452_s_at  | 23.12 | 3.05E-22   |
| ATP5L        | 210453_x_at  | 23.11 | 2.72E-24   |
| MRPL15       | 218027_at    | 23.11 | 7.10E-23   |
| TMEM230      | 220477_s_at  | 23.11 | 3.56E-38   |
| RTFDC1       | 234926_s_at  | 23.08 | 2.30E-29   |
| RNPEP        | 208270_s_at  | 23.07 | 4.21E-28   |
| VTA1         | 223021_x_at  | 23.05 | < 2.90E-44 |
| AHRR         | 229354_at    | 23.00 | 3.08E-28   |
| FBXO7        | 1554423_a_at | 22.94 | 1.30E-34   |
| TUFM         | 201113_at    | 22.89 | 5.98E-30   |
| VCL          | 200931_s_at  | 22.85 | 2.03E-24   |
| YWHAE        | 210996_s_at  | 22.83 | 1.82E-29   |
| HARS         | 202042_at    | 22.81 | 1.66E-30   |
| WNT5A        | 205990_s_at  | 22.76 | 3.09E-12   |
| PHPT1        | 223207_x_at  | 22.76 | 3.32E-26   |
| ACAT1        | 205412_at    | 22.75 | 1.45E-25   |
| COX16        | 223191_at    | 22.75 | 3.70E-31   |
| VAMP3        | 201336_at    | 22.67 | 7.12E-27   |
| HSP90AA1     | 211968_s_at  | 22.63 | 9.55E-22   |
| CCT5         | 208696_at    | 22.60 | 1.54E-30   |
| SHC1         | 214853_s_at  | 22.60 | 2.36E-26   |
| SNX7         | 205573_s_at  | 22.50 | 1.24E-15   |
| PSMD10       | 219485_s_at  | 22.48 | 3.80E-19   |
| PSMB5        | 208799_at    | 22.47 | 5.23E-29   |
| DCTN6        | 203261_at    | 22.46 | 1.44E-27   |
| MRPS10       | 224247_s_at  | 22.41 | 1.14E-43   |
| CCT3         | 200910_at    | 22.41 | 1.75E-22   |
| HNRNPM       | 200072_s_at  | 22.41 | 2.55E-24   |
| CD63         | 200663_at    | 22.40 | 1.47E-25   |
| PHLDA1       | 217996_at    | 22.36 | 8.71E-17   |
| MRPL13       | 218049_s_at  | 22.29 | 8.53E-23   |
| PPP1R14B     | 212680_x_at  | 22.29 | 1.55E-28   |
| ERH          | 200043_at    | 22.24 | 6.37E-31   |
| EDF1         | 209059_s_at  | 22.24 | 9.52E-23   |
| SERINC3      | 211769_x_at  | 22.23 | 7.95E-28   |
| KPNA3        | 221503_s_at  | 22.23 | 1.47E-39   |
| GORASP2      | 207812_s_at  | 22.19 | 3.45E-24   |
| GPC4         | 204983_s_at  | 22.14 | 7.11E-39   |
| LOC100996724 | 214130_s_at  | 22.13 | < 2.90E-44 |

|            |             |       |            |
|------------|-------------|-------|------------|
| RPL13A     | 200716_x_at | 22.13 | 1.86E-20   |
| PBK        | 219148_at   | 22.13 | 1.03E-24   |
| LAMB1      | 211651_s_at | 22.08 | 7.10E-19   |
| CTSD       | 200766_at   | 22.04 | 1.40E-24   |
| SPOCK1     | 202363_at   | 22.03 | 7.33E-13   |
| NELFCD     | 220607_x_at | 22.02 | 1.38E-30   |
| LSS        | 202245_at   | 22.01 | 1.39E-29   |
| ID2        | 201565_s_at | 22.01 | 2.63E-21   |
| RPS6KA2    | 212912_at   | 22.00 | 3.10E-33   |
| VPS35      | 222387_s_at | 21.98 | < 2.90E-44 |
| GINM1      | 225576_at   | 21.97 | 6.20E-32   |
| FZD2       | 210220_at   | 21.97 | 5.37E-26   |
| HIST2H2AA3 | 214290_s_at | 21.96 | 6.32E-23   |
| ALCAM      | 201951_at   | 21.94 | 1.22E-25   |
| CEBPG      | 204203_at   | 21.93 | 5.97E-28   |
| SLC39A7    | 202667_s_at | 21.89 | 6.05E-32   |
| PAIP2      | 222983_s_at | 21.85 | 1.02E-25   |
| SDAD1      | 228408_s_at | 21.84 | 4.92E-33   |
| OTUB1      | 201245_s_at | 21.83 | 2.16E-35   |
| SNRPB      | 208821_at   | 21.81 | 1.11E-23   |
| RNF181     | 223064_at   | 21.81 | 2.55E-36   |
| SUPT4H1    | 201483_s_at | 21.77 | 4.81E-34   |
| PSMD14     | 212296_at   | 21.74 | 4.28E-23   |
| KHDRBS1    | 201488_x_at | 21.71 | 3.92E-31   |
| SEC13      | 207707_s_at | 21.71 | 1.30E-28   |
| SLC7A5     | 201195_s_at | 21.70 | 2.08E-35   |
| CANX       | 208852_s_at | 21.68 | 7.08E-22   |
| PPP3R1     | 204506_at   | 21.65 | 2.90E-44   |
| PRICKLE4   | 223516_s_at | 21.62 | 4.30E-21   |
| FKBP14     | 219390_at   | 21.61 | 1.82E-18   |
| KIAA1199   | 212942_s_at | 21.59 | 7.31E-09   |
| TMED3      | 208837_at   | 21.58 | 6.26E-26   |
| RCHY1      | 212749_s_at | 21.53 | 3.32E-22   |
| NEGR1      | 243357_at   | 21.53 | 1.50E-34   |
| SNHG16     | 224603_at   | 21.52 | 1.00E-25   |
| LSM3       | 202209_at   | 21.51 | 2.37E-31   |
| JKAMP      | 223215_s_at | 21.45 | 9.48E-25   |
| RAB18      | 224787_s_at | 21.44 | 2.06E-23   |
| LDLR       | 202068_s_at | 21.44 | 1.64E-20   |
| POMP       | 217769_s_at | 21.44 | 8.49E-28   |
| PSMD4      | 210460_s_at | 21.44 | 1.75E-24   |

|          |             |       |            |
|----------|-------------|-------|------------|
| CCT6A    | 201327_s_at | 21.43 | 6.76E-26   |
| DPY30    | 224129_s_at | 21.39 | 1.75E-23   |
| CAMK2D   | 224994_at   | 21.36 | 3.94E-41   |
| SCFD1    | 215548_s_at | 21.31 | 2.47E-30   |
| KCNK2    | 210261_at   | 21.30 | < 2.90E-44 |
| ATP5A1   | 213738_s_at | 21.27 | 7.68E-21   |
| SH3BP4   | 222258_s_at | 21.26 | 1.20E-23   |
| ARPC4    | 211672_s_at | 21.25 | < 2.90E-44 |
| ETF1     | 201574_at   | 21.25 | 1.25E-29   |
| SLC1A1   | 213664_at   | 21.21 | 4.14E-21   |
| UBE2G2   | 209042_s_at | 21.20 | 4.43E-27   |
| KARS     | 200079_s_at | 21.17 | 5.54E-25   |
| CIB1     | 201953_at   | 21.16 | 2.80E-27   |
| RRM1     | 201477_s_at | 21.15 | 9.47E-26   |
| FAM96B   | 218074_at   | 21.14 | 5.81E-29   |
| TRIOBP   | 210276_s_at | 21.09 | 6.08E-28   |
| C12orf57 | 224719_s_at | 21.07 | 2.16E-21   |
| SF3B5    | 221263_s_at | 21.06 | 8.07E-26   |
| ATOX1    | 203454_s_at | 21.04 | 7.49E-33   |
| ATP1A1   | 220948_s_at | 20.99 | 7.07E-26   |
| ODC1     | 200790_at   | 20.96 | 4.17E-23   |
| ARPC1B   | 201954_at   | 20.94 | 2.25E-23   |
| NUCB2    | 203675_at   | 20.93 | 6.93E-23   |
| GLUD1    | 200946_x_at | 20.91 | 3.03E-30   |
| BASP1    | 202391_at   | 20.90 | 2.80E-21   |
| SSR3     | 222412_s_at | 20.89 | 4.83E-26   |
| SMAD2    | 203076_s_at | 20.87 | 1.51E-25   |
| CTSA     | 200661_at   | 20.86 | 2.59E-27   |
| DCN      | 211896_s_at | 20.86 | 1.90E-17   |
| COPB1    | 201359_at   | 20.83 | 1.22E-23   |
| RTN3     | 219549_s_at | 20.82 | 3.22E-31   |
| RPS16    | 201258_at   | 20.82 | 4.51E-19   |
| PGRMC1   | 201120_s_at | 20.82 | 1.46E-40   |
| UBE2R2   | 223014_at   | 20.81 | 6.24E-28   |
| RAB2A    | 208734_x_at | 20.81 | 9.31E-23   |
| MRPL40   | 203152_at   | 20.81 | 1.02E-31   |
| SLC39A6  | 202089_s_at | 20.80 | 1.89E-28   |
| COL3A1   | 201852_x_at | 20.78 | 1.82E-13   |
| ENO2     | 201313_at   | 20.75 | 8.86E-22   |
| ADH5     | 208848_at   | 20.75 | 7.09E-17   |
| TMSB4X   | 216438_s_at | 20.73 | 7.64E-21   |

|          |             |       |            |
|----------|-------------|-------|------------|
| AMZ2     | 218167_at   | 20.73 | 9.62E-22   |
| YTHDF2   | 222430_s_at | 20.70 | 2.13E-23   |
| GDE1     | 202593_s_at | 20.69 | < 2.90E-44 |
| P4HA1    | 207543_s_at | 20.68 | 5.56E-17   |
| AP2B1    | 200615_s_at | 20.67 | 9.97E-29   |
| IMPDH2   | 201892_s_at | 20.64 | 1.99E-18   |
| NPEPPS   | 201455_s_at | 20.64 | 1.69E-29   |
| MAP1LC3B | 208786_s_at | 20.64 | 4.31E-23   |
| EMC1     | 212396_s_at | 20.63 | 4.76E-38   |
| SLC20A1  | 201920_at   | 20.60 | 3.13E-19   |
| TARS     | 201263_at   | 20.57 | 3.32E-27   |
| DCBLD2   | 224911_s_at | 20.52 | 2.33E-16   |
| COPS5    | 201652_at   | 20.50 | 3.80E-23   |
| UBE2E3   | 210024_s_at | 20.48 | 1.45E-23   |
| TIMM17A  | 201821_s_at | 20.47 | 2.50E-31   |
| COPZ1    | 222386_s_at | 20.46 | 9.27E-25   |
| HNRNPL   | 202072_at   | 20.45 | < 2.90E-44 |
| RAB27B   | 228708_at   | 20.44 | 9.87E-17   |
| CUL3     | 201371_s_at | 20.43 | 3.27E-23   |
| SATB2    | 213435_at   | 20.42 | 2.52E-40   |
| PRPS1    | 208447_s_at | 20.42 | < 2.90E-44 |
| HRAS     | 212983_at   | 20.40 | 6.90E-30   |
| PPIC     | 204518_s_at | 20.37 | 4.18E-20   |
| NPC2     | 200701_at   | 20.35 | 1.44E-22   |
| MLF2     | 200948_at   | 20.33 | 5.50E-28   |
| COPB2    | 201098_at   | 20.33 | 2.81E-23   |
| MFAP5    | 209758_s_at | 20.30 | 5.14E-07   |
| MGAT4B   | 220189_s_at | 20.30 | 6.60E-41   |
| WDR61    | 221532_s_at | 20.29 | 7.58E-20   |
| SNF8     | 218391_at   | 20.27 | 6.27E-29   |
| NDUFS1   | 203039_s_at | 20.25 | 3.35E-34   |
| BUD31    | 205690_s_at | 20.25 | 1.55E-24   |
| EXTL2    | 209537_at   | 20.23 | 2.32E-30   |
| LDHB     | 213564_x_at | 20.23 | 8.80E-20   |
| RIT1     | 209882_at   | 20.14 | 9.15E-34   |
| MPRIIP   | 214771_x_at | 20.14 | 3.41E-28   |
| PSMC5    | 209503_s_at | 20.12 | 5.26E-27   |
| ZSWIM7   | 229119_s_at | 20.12 | 1.49E-27   |
| RPS6     | 200081_s_at | 20.11 | 6.46E-22   |
| ACOT9    | 221641_s_at | 20.10 | 1.68E-29   |
| RPL19    | 200029_at   | 20.10 | 4.75E-22   |

|              |             |       |          |
|--------------|-------------|-------|----------|
| LOC100288911 | 236656_s_at | 20.08 | 6.02E-26 |
| EIF6         | 210213_s_at | 20.07 | 5.77E-28 |
| IRX3         | 229638_at   | 20.06 | 1.08E-11 |
| ZNF423       | 214761_at   | 20.06 | 6.91E-20 |
| MRPS23       | 223156_at   | 20.06 | 1.43E-23 |
| CSRP1        | 200621_at   | 20.05 | 1.45E-21 |
| FOSL2        | 218880_at   | 20.02 | 1.75E-19 |
| MRPL18       | 217907_at   | 20.00 | 4.87E-29 |
| TRAPPC2L     | 218354_at   | 19.99 | 1.96E-39 |
| COPS6        | 201405_s_at | 19.98 | 6.01E-25 |
| HIRA         | 217427_s_at | 19.95 | 2.06E-31 |
| GNG5         | 207157_s_at | 19.91 | 2.66E-23 |
| PBDC1        | 223294_at   | 19.90 | 1.92E-25 |
| WAC          | 217742_s_at | 19.90 | 5.81E-24 |
| YY1          | 201901_s_at | 19.88 | 1.75E-29 |
| AHCYL1       | 200850_s_at | 19.88 | 4.22E-26 |
| XRCC6        | 200792_at   | 19.88 | 1.41E-26 |
| P2RX5        | 215464_s_at | 19.82 | 4.43E-29 |
| ARID4B       | 212591_at   | 19.81 | 1.01E-23 |
| LTBP3        | 219922_s_at | 19.80 | 3.54E-19 |
| TAF10        | 200055_at   | 19.80 | 3.47E-28 |
| PPP1CA       | 200846_s_at | 19.80 | 3.58E-31 |
| EIF4G1       | 208625_s_at | 19.78 | 2.93E-29 |
| GPX4         | 201106_at   | 19.78 | 6.45E-22 |
| RNF130       | 217865_at   | 19.76 | 1.02E-25 |
| VPS29        | 223026_s_at | 19.72 | 1.92E-27 |
| ATP5J2       | 202961_s_at | 19.69 | 4.15E-24 |
| PWP1         | 201606_s_at | 19.68 | 4.20E-24 |
| MMADHC       | 217883_at   | 19.67 | 1.00E-18 |
| RPA1         | 201529_s_at | 19.66 | 1.89E-24 |
| ACOT7        | 208002_s_at | 19.64 | 1.54E-33 |
| NSF          | 202395_at   | 19.63 | 9.64E-29 |
| HMGCR        | 202539_s_at | 19.61 | 4.22E-21 |
| FAM127A      | 201828_x_at | 19.61 | 5.45E-26 |
| SYPL1        | 201259_s_at | 19.60 | 8.11E-43 |
| TRIP12       | 201546_at   | 19.60 | 2.59E-26 |
| MAP7D1       | 217943_s_at | 19.59 | 4.67E-31 |
| MYL12A       | 201318_s_at | 19.59 | 2.57E-20 |
| LAMP2        | 203041_s_at | 19.58 | 2.99E-21 |
| RPL36AL      | 207585_s_at | 19.53 | 2.78E-20 |
| SLBP         | 206052_s_at | 19.53 | 2.16E-22 |



|              |             |       |            |
|--------------|-------------|-------|------------|
| EMC3         | 217882_at   | 19.51 | 2.77E-29   |
| SAMM50       | 201569_s_at | 19.50 | 6.29E-24   |
| STUB1        | 233049_x_at | 19.50 | 7.54E-28   |
| PCMT1        | 210156_s_at | 19.49 | 5.74E-31   |
| SRSF7        | 214141_x_at | 19.48 | 1.84E-23   |
| FAM98A       | 212333_at   | 19.47 | 2.95E-21   |
| RARS         | 201330_at   | 19.46 | 6.78E-25   |
| MAP1A        | 203151_at   | 19.43 | 5.38E-37   |
| MRPL47       | 223480_s_at | 19.41 | 9.94E-22   |
| RPL8         | 200936_at   | 19.40 | 1.63E-21   |
| MAGED1       | 209014_at   | 19.38 | 1.85E-25   |
| RTN4         | 210968_s_at | 19.36 | 9.09E-21   |
| YBX3         | 201161_s_at | 19.35 | 1.05E-26   |
| LOC100505828 | 201403_s_at | 19.34 | 7.76E-31   |
| TSR1         | 218156_s_at | 19.33 | < 2.90E-44 |
| DHCR24       | 200862_at   | 19.33 | 2.87E-15   |
| ATP6V0D1     | 212041_at   | 19.30 | 3.85E-27   |
| VPS28        | 218679_s_at | 19.30 | 1.01E-21   |
| AKR1C1       | 204151_x_at | 19.26 | 1.58E-21   |
| DDX3X        | 212515_s_at | 19.26 | 1.39E-24   |
| AHCY         | 200903_s_at | 19.26 | 2.72E-24   |
| TUBG1        | 201714_at   | 19.24 | 2.57E-28   |
| EBPL         | 223306_at   | 19.22 | 4.54E-21   |
| NDUFS5       | 201757_at   | 19.19 | 4.41E-27   |
| CD9          | 201005_at   | 19.15 | 2.56E-14   |
| BAG6         | 213318_s_at | 19.13 | 2.76E-28   |
| FBLN1        | 202995_s_at | 19.12 | 1.42E-14   |
| FKBP1A       | 200709_at   | 19.08 | 3.35E-23   |
| TOP2A        | 201291_s_at | 19.08 | 9.45E-15   |
| PSENFEN      | 218302_at   | 19.07 | 4.02E-30   |
| LRRFIP1      | 201862_s_at | 19.06 | 8.81E-19   |
| RNASE4       | 205158_at   | 19.04 | 3.28E-35   |
| EMP1         | 201325_s_at | 19.02 | 7.12E-21   |
| POLE4        | 225844_at   | 19.01 | 1.96E-30   |
| DDAH2        | 215537_x_at | 18.99 | 7.08E-29   |
| PRPF40A      | 213729_at   | 18.96 | 1.66E-27   |
| LMO4         | 209205_s_at | 18.95 | 5.17E-39   |
| FSCN1        | 201564_s_at | 18.95 | 8.54E-31   |
| ORAI2        | 217529_at   | 18.94 | 6.74E-35   |
| CHCHD2       | 217720_at   | 18.94 | 2.21E-25   |
| RBPMS        | 209488_s_at | 18.93 | 6.20E-23   |

|              |              |       |            |
|--------------|--------------|-------|------------|
| CDC26        | 225422_at    | 18.93 | 1.96E-29   |
| YIF1A        | 202418_at    | 18.91 | 4.83E-26   |
| UBE2I        | 213535_s_at  | 18.91 | 1.42E-30   |
| IRX5         | 210239_at    | 18.90 | < 2.90E-44 |
| KLF6         | 208961_s_at  | 18.90 | 3.38E-20   |
| UBE2K        | 202347_s_at  | 18.89 | 3.13E-24   |
| HSBP1        | 200942_s_at  | 18.88 | 8.77E-32   |
| EIF4E2       | 209393_s_at  | 18.88 | 6.75E-21   |
| SF3B14       | 223416_at    | 18.88 | 4.99E-25   |
| WARS         | 200628_s_at  | 18.84 | 4.65E-37   |
| EIF5B        | 201027_s_at  | 18.82 | 6.66E-32   |
| ACTN4        | 200601_at    | 18.81 | 2.00E-26   |
| PLRG1        | 225194_at    | 18.80 | 1.19E-28   |
| UBC          | 211296_x_at  | 18.80 | 1.96E-23   |
| ZNF706       | 218059_at    | 18.79 | 1.47E-27   |
| MRFAP1L1     | 212199_at    | 18.76 | 2.80E-26   |
| C11orf58     | 201784_s_at  | 18.76 | 6.85E-20   |
| IFITM2       | 201315_x_at  | 18.74 | 6.07E-23   |
| GNG12        | 212294_at    | 18.73 | 4.10E-22   |
| DDT          | 202929_s_at  | 18.72 | 7.74E-30   |
| ADAM12       | 213790_at    | 18.71 | 2.33E-10   |
| TMED10       | 200929_at    | 18.70 | 5.90E-27   |
| TAF7         | 201023_at    | 18.69 | 2.93E-23   |
| FAP          | 209955_s_at  | 18.69 | 8.80E-11   |
| SARNP        | 224914_s_at  | 18.68 | 3.08E-27   |
| SSR4         | 201004_at    | 18.65 | 1.53E-19   |
| C17orf49     | 224574_at    | 18.63 | 1.70E-24   |
| YKT6         | 217785_s_at  | 18.62 | < 2.90E-44 |
| IPO5         | 211954_s_at  | 18.62 | 6.10E-34   |
| NUS1         | 225070_at    | 18.60 | 2.49E-41   |
| SDC4         | 202071_at    | 18.58 | 2.33E-20   |
| SMIM19       | 225534_at    | 18.55 | 9.10E-19   |
| KIAA1279     | 212453_at    | 18.55 | 3.04E-34   |
| GPX1         | 200736_s_at  | 18.53 | 1.32E-20   |
| NACC2        | 212993_at    | 18.53 | 1.78E-22   |
| DPAGT1       | 209509_s_at  | 18.52 | 4.41E-39   |
| MRPS2        | 218001_at    | 18.52 | 1.72E-29   |
| UQCRH        | 202233_s_at  | 18.50 | 5.50E-22   |
| COL4A1       | 211981_at    | 18.48 | 1.47E-16   |
| LOC100653217 | 227566_at    | 18.42 | 9.70E-07   |
| TYMS         | 1554696_s_at | 18.41 | < 2.90E-44 |

|           |              |       |            |
|-----------|--------------|-------|------------|
| MYADM     | 225673_at    | 18.41 | 1.31E-20   |
| TRAPPC5   | 225870_s_at  | 18.40 | 2.89E-31   |
| NUP37     | 218622_at    | 18.37 | 6.79E-24   |
| KIAA0391  | 208805_at    | 18.37 | 1.81E-23   |
| NRP1      | 212298_at    | 18.36 | 1.15E-17   |
| CTNNA1    | 210844_x_at  | 18.36 | 4.07E-26   |
| VMA21     | 225556_at    | 18.35 | 6.84E-30   |
| DCTN1     | 201082_s_at  | 18.31 | 2.16E-41   |
| GABARAPL2 | 209046_s_at  | 18.31 | 2.07E-20   |
| TXNDC17   | 224511_s_at  | 18.28 | 3.52E-28   |
| CMC2      | 218447_at    | 18.26 | 6.08E-26   |
| PPA2      | 1556285_s_at | 18.26 | 7.60E-31   |
| CLU       | 208791_at    | 18.24 | 3.14E-13   |
| CNOT8     | 202164_s_at  | 18.23 | 2.00E-36   |
| AP1S1     | 205195_at    | 18.23 | < 2.90E-44 |
| PTPRK     | 203038_at    | 18.22 | 2.05E-18   |
| ME1       | 204059_s_at  | 18.19 | 2.90E-20   |
| COA3      | 218026_at    | 18.18 | 9.15E-29   |
| NAP1L1    | 208752_x_at  | 18.18 | 1.36E-22   |
| PPID      | 204186_s_at  | 18.17 | 3.72E-29   |
| CCZ1      | 208310_s_at  | 18.16 | 9.26E-32   |
| COMMD1    | 226024_at    | 18.14 | 1.20E-31   |
| DCTD      | 210137_s_at  | 18.11 | 5.53E-23   |
| FADS3     | 216080_s_at  | 18.09 | 1.49E-42   |
| SQSTM1    | 201471_s_at  | 18.08 | 1.53E-24   |
| G6PD      | 202275_at    | 18.07 | 5.69E-41   |
| TIMM50    | 224913_s_at  | 18.05 | 1.14E-32   |
| IARS2     | 217900_at    | 18.05 | 4.60E-22   |
| HRSP12    | 203790_s_at  | 18.05 | 3.85E-27   |
| ZMAT3     | 228315_at    | 18.05 | 2.04E-18   |
| MBNL1     | 201152_s_at  | 18.03 | 3.29E-26   |
| EPS8      | 202609_at    | 17.99 | 4.42E-13   |
| TRIP6     | 209129_at    | 17.98 | 4.49E-22   |
| PFDN2     | 218336_at    | 17.96 | 3.55E-29   |
| DNAJA1    | 200881_s_at  | 17.96 | 6.29E-24   |
| TMEM50A   | 217766_s_at  | 17.96 | 6.39E-29   |
| MIF       | 217871_s_at  | 17.93 | 1.52E-18   |
| SNW1      | 215424_s_at  | 17.92 | 1.44E-40   |
| GSE1      | 212057_at    | 17.92 | 2.60E-41   |
| FSTL1     | 208782_at    | 17.92 | 2.80E-23   |
| NPC1      | 202679_at    | 17.91 | 1.22E-37   |

|              |             |       |          |
|--------------|-------------|-------|----------|
| WSB2         | 201760_s_at | 17.89 | 7.62E-18 |
| AP2A2        | 212159_x_at | 17.88 | 9.45E-30 |
| NDUFA1       | 202298_at   | 17.86 | 2.03E-30 |
| CMTM6        | 223047_at   | 17.83 | 1.30E-17 |
| POLR2C       | 208996_s_at | 17.83 | 2.47E-31 |
| MLLT11       | 211071_s_at | 17.82 | 2.52E-19 |
| CDC37L1      | 219343_at   | 17.80 | 8.65E-33 |
| FN1          | 214702_at   | 17.79 | 1.06E-19 |
| SCCPDH       | 201825_s_at | 17.78 | 2.58E-32 |
| DDIT4        | 202887_s_at | 17.78 | 3.27E-14 |
| PDZD11       | 223037_at   | 17.77 | 2.86E-33 |
| CCNI         | 208656_s_at | 17.76 | 2.28E-23 |
| TIMP2        | 224560_at   | 17.75 | 3.45E-18 |
| IGF2R        | 201393_s_at | 17.74 | 7.18E-29 |
| GRPEL1       | 212432_at   | 17.74 | 2.11E-30 |
| CYB5R1       | 202263_at   | 17.73 | 2.86E-37 |
| CCDC85B      | 204610_s_at | 17.73 | 7.70E-24 |
| SLC30A5      | 232432_s_at | 17.69 | 8.36E-23 |
| PUM1         | 201164_s_at | 17.64 | 1.03E-29 |
| NAA35        | 220925_at   | 17.64 | 7.55E-28 |
| LOC100996657 | 210178_x_at | 17.64 | 3.70E-37 |
| DAP          | 201095_at   | 17.63 | 5.38E-27 |
| SSR2         | 200652_at   | 17.63 | 1.72E-28 |
| MRPL16       | 217980_s_at | 17.61 | 8.65E-30 |
| IFITM10      | 227863_at   | 17.60 | 4.08E-38 |
| ELAVL1       | 201726_at   | 17.60 | 1.05E-26 |
| RAPH1        | 225189_s_at | 17.60 | 1.75E-19 |
| SERINC1      | 208671_at   | 17.59 | 3.87E-20 |
| HNRNPAB      | 201277_s_at | 17.58 | 2.36E-23 |
| ANKMY2       | 212798_s_at | 17.58 | 4.65E-21 |
| EIF3I        | 208756_at   | 17.58 | 1.69E-25 |
| TROVE2       | 210438_x_at | 17.57 | 1.49E-25 |
| PSMA2        | 201317_s_at | 17.57 | 2.22E-19 |
| UBE2G1       | 209142_s_at | 17.55 | 3.90E-25 |
| SPG21        | 217827_s_at | 17.53 | 4.16E-29 |
| GLS          | 203159_at   | 17.52 | 3.44E-21 |
| RNF141       | 219104_at   | 17.51 | 9.78E-42 |
| BAMBI        | 203304_at   | 17.51 | 2.60E-13 |
| LYRM4        | 218561_s_at | 17.50 | 2.94E-27 |
| RPS27L       | 218007_s_at | 17.49 | 7.82E-20 |
| UTP3         | 209486_at   | 17.49 | 1.70E-27 |

|          |             |       |            |
|----------|-------------|-------|------------|
| SLC14A1  | 229151_at   | 17.47 | 0          |
| SNAPC1   | 205443_at   | 17.47 | 4.50E-24   |
| ATP6AP1  | 207809_s_at | 17.46 | 1.41E-27   |
| KIAA0100 | 201729_s_at | 17.45 | 1.14E-32   |
| TBC1D19  | 220260_at   | 17.43 | 1.17E-30   |
| RHOQ     | 212117_at   | 17.42 | 1.80E-24   |
| ARPC5    | 211963_s_at | 17.38 | 1.03E-19   |
| RPL35    | 200002_at   | 17.38 | 4.25E-19   |
| TECR     | 208336_s_at | 17.38 | 9.22E-26   |
| PPP2R3C  | 218852_at   | 17.37 | 1.90E-26   |
| NTMT1    | 223369_at   | 17.36 | 3.94E-39   |
| GOLGA5   | 218241_at   | 17.34 | 3.41E-22   |
| AKR1C2   | 211653_x_at | 17.33 | 3.04E-34   |
| PIZO1    | 202771_at   | 17.33 | 6.19E-23   |
| EIF4G3   | 201935_s_at | 17.30 | 1.42E-25   |
| NAGK     | 218231_at   | 17.30 | 1.33E-22   |
| CLCN3    | 201735_s_at | 17.27 | 4.19E-28   |
| CLTB     | 206284_x_at | 17.26 | 2.80E-28   |
| CAPN2    | 208683_at   | 17.23 | 1.58E-20   |
| RPL15    | 221476_s_at | 17.20 | 3.24E-20   |
| LMBRD1   | 218191_s_at | 17.19 | 4.02E-22   |
| SLC35B1  | 202433_at   | 17.18 | 2.67E-28   |
| RPS6KC1  | 218909_at   | 17.16 | 5.51E-30   |
| EPRS     | 200842_s_at | 17.15 | 3.46E-26   |
| SLC16A1  | 202236_s_at | 17.15 | 3.01E-38   |
| MRPL27   | 224330_s_at | 17.13 | 4.45E-34   |
| NAA15    | 222837_s_at | 17.13 | < 2.90E-44 |
| CLTC     | 200614_at   | 17.12 | 4.85E-19   |
| ITGA5    | 201389_at   | 17.10 | 1.04E-21   |
| B4GALT1  | 201883_s_at | 17.07 | 1.72E-28   |
| RPS5     | 200024_at   | 17.06 | 2.11E-18   |
| EFEMP2   | 209356_x_at | 17.06 | 3.71E-23   |
| COX7B    | 202110_at   | 17.05 | 1.38E-25   |
| PRPF4    | 209162_s_at | 17.05 | < 2.90E-44 |
| ZBTB1    | 213376_at   | 17.00 | 2.86E-23   |
| NDUFS4   | 209303_at   | 17.00 | 8.62E-30   |
| POLE3    | 208828_at   | 16.99 | 3.60E-27   |
| PSMA7    | 216088_s_at | 16.98 | 7.12E-23   |
| RAF1     | 201244_s_at | 16.97 | 4.10E-29   |
| MAP2K2   | 202424_at   | 16.94 | 1.38E-27   |
| ACSL3    | 201662_s_at | 16.94 | 1.35E-21   |

|          |              |       |            |
|----------|--------------|-------|------------|
| NFU1     | 218946_at    | 16.94 | 2.24E-25   |
| SLC25A11 | 207088_s_at  | 16.92 | 5.84E-36   |
| TRAPPC1  | 225294_s_at  | 16.91 | 6.00E-32   |
| SLC25A5  | 200657_at    | 16.91 | 4.55E-23   |
| DNAJC7   | 202416_at    | 16.91 | 1.05E-32   |
| EXOC5    | 225084_at    | 16.90 | 1.08E-28   |
| VARS     | 201797_s_at  | 16.89 | 9.54E-31   |
| XPNPEP1  | 208453_s_at  | 16.88 | < 2.90E-44 |
| RPS2     | 212433_x_at  | 16.88 | 1.14E-22   |
| RPF1     | 218462_at    | 16.87 | 8.06E-22   |
| RPL23    | 200888_s_at  | 16.87 | 1.03E-14   |
| DHRS7    | 210788_s_at  | 16.86 | 6.12E-33   |
| COL6A1   | 212091_s_at  | 16.85 | 1.42E-26   |
| AP3D1    | 208710_s_at  | 16.83 | 1.07E-13   |
| ARID5B   | 212614_at    | 16.82 | 9.17E-21   |
| FAM114A1 | 213455_at    | 16.80 | 1.44E-21   |
| EBF3     | 227242_s_at  | 16.77 | < 2.90E-44 |
| ADAM9    | 1555326_a_at | 16.77 | < 2.90E-44 |
| ACP1     | 201629_s_at  | 16.77 | 7.06E-25   |
| COX6B1   | 201441_at    | 16.75 | 8.78E-23   |
| TRA2B    | 200892_s_at  | 16.75 | 2.88E-26   |
| HSPE1    | 205133_s_at  | 16.75 | 5.30E-23   |
| MRPS28   | 219819_s_at  | 16.74 | 1.30E-29   |
| ANKH     | 223092_at    | 16.74 | 9.69E-15   |
| SLC4A4   | 203908_at    | 16.71 | 1.67E-16   |
| MT1X     | 208581_x_at  | 16.71 | 1.09E-15   |
| GAP43    | 204471_at    | 16.69 | 3.31E-28   |
| CDC20    | 202870_s_at  | 16.66 | 1.44E-18   |
| PPP2R5E  | 229322_at    | 16.66 | 4.29E-23   |
| SMDT1    | 225795_at    | 16.64 | 4.82E-19   |
| TES      | 202719_s_at  | 16.63 | 1.09E-21   |
| PDCD6IP  | 217746_s_at  | 16.63 | 8.37E-25   |
| CALCOCO2 | 210817_s_at  | 16.58 | 2.88E-30   |
| BOK      | 223349_s_at  | 16.58 | 4.22E-28   |
| MATR3    | 200626_s_at  | 16.58 | 1.06E-19   |
| CHMP4B   | 225498_at    | 16.56 | 1.10E-24   |
| SSR1     | 201894_s_at  | 16.56 | 3.20E-18   |
| PCDHGA1  | 211066_x_at  | 16.54 | 4.39E-30   |
| RBFOX2   | 213901_x_at  | 16.53 | 4.34E-37   |
| PSPH     | 205048_s_at  | 16.52 | 1.83E-16   |
| DKC1     | 201478_s_at  | 16.50 | 5.25E-29   |

|         |              |       |            |
|---------|--------------|-------|------------|
| UBXN4   | 212007_at    | 16.50 | 2.20E-19   |
| ASPH    | 210896_s_at  | 16.50 | 1.20E-24   |
| GYS1    | 201673_s_at  | 16.49 | 6.58E-37   |
| CORO1B  | 64486_at     | 16.48 | 2.34E-31   |
| CDC16   | 202717_s_at  | 16.46 | 3.66E-26   |
| P4HA2   | 202733_at    | 16.44 | 1.53E-14   |
| TBPL1   | 208398_s_at  | 16.44 | 2.56E-27   |
| SPG7    | 202104_s_at  | 16.43 | 2.17E-26   |
| LURAP1L | 227443_at    | 16.41 | 1.50E-29   |
| RHEB    | 1555780_a_at | 16.40 | 5.40E-30   |
| ATG5    | 202511_s_at  | 16.40 | 6.64E-31   |
| AK4     | 204348_s_at  | 16.37 | 3.72E-21   |
| RPL35A  | 213687_s_at  | 16.37 | 4.64E-20   |
| UFC1    | 217797_at    | 16.37 | 1.48E-22   |
| GSTP1   | 200824_at    | 16.36 | 8.94E-25   |
| ARF5    | 201526_at    | 16.36 | 2.73E-42   |
| RAP2C   | 218669_at    | 16.33 | 5.22E-21   |
| QDPR    | 209123_at    | 16.33 | 3.50E-31   |
| MT1F    | 217165_x_at  | 16.32 | 1.65E-16   |
| TUG1    | 212725_s_at  | 16.31 | 6.08E-20   |
| UBE2D3  | 200669_s_at  | 16.31 | 5.43E-34   |
| EIF3B   | 211501_s_at  | 16.30 | 2.58E-27   |
| FHL1    | 210299_s_at  | 16.30 | 1.20E-32   |
| ATP6V1H | 221504_s_at  | 16.30 | 9.76E-28   |
| GNB2    | 200852_x_at  | 16.29 | 1.50E-25   |
| RPN1    | 201011_at    | 16.29 | 1.82E-25   |
| PDLIM2  | 219165_at    | 16.28 | 2.96E-22   |
| TMEM47  | 209656_s_at  | 16.26 | 2.94E-12   |
| NOP10   | 217962_at    | 16.26 | 4.30E-26   |
| FADS1   | 208962_s_at  | 16.24 | 1.61E-25   |
| H2AFY   | 214500_at    | 16.24 | 3.86E-38   |
| PPP2R2A | 202313_at    | 16.20 | 2.21E-32   |
| COL4A2  | 211966_at    | 16.18 | 2.42E-16   |
| PCDH18  | 225975_at    | 16.18 | 2.94E-13   |
| ANKRD1  | 206029_at    | 16.17 | < 2.90E-44 |
| DDA1    | 218260_at    | 16.15 | < 2.90E-44 |
| DACT1   | 219179_at    | 16.14 | 3.02E-15   |
| ILF3    | 208931_s_at  | 16.14 | < 2.90E-44 |
| THYN1   | 218491_s_at  | 16.13 | 1.57E-21   |
| ZKSCAN1 | 1557953_at   | 16.12 | 1.20E-21   |
| EIF3K   | 212716_s_at  | 16.12 | 2.55E-21   |

|           |              |       |            |
|-----------|--------------|-------|------------|
| SCARB2    | 224983_at    | 16.12 | 1.39E-24   |
| SERPINB6  | 211474_s_at  | 16.11 | 5.43E-25   |
| BANF1     | 210125_s_at  | 16.10 | 1.01E-24   |
| ALKBH5    | 1553101_a_at | 16.10 | < 2.90E-44 |
| HADHA     | 208631_s_at  | 16.09 | 2.26E-25   |
| FEZ1      | 203562_at    | 16.09 | 1.60E-26   |
| IDH3A     | 202069_s_at  | 16.09 | 1.25E-25   |
| ASNA1     | 202024_at    | 16.06 | 2.89E-24   |
| LTBP2     | 223690_at    | 16.06 | 1.33E-16   |
| MFGE8     | 210605_s_at  | 16.06 | 9.34E-40   |
| ERP29     | 201216_at    | 16.04 | 3.14E-24   |
| SRSF2     | 200754_x_at  | 16.03 | 3.54E-27   |
| MTFR1     | 203207_s_at  | 16.03 | 1.09E-36   |
| SEC31A    | 210616_s_at  | 16.02 | 1.31E-22   |
| COX6C     | 201754_at    | 16.02 | 3.32E-20   |
| CNIH4     | 223993_s_at  | 16.01 | 3.32E-20   |
| RAD1      | 204460_s_at  | 16.01 | 2.56E-42   |
| ARMC10    | 223328_at    | 16.01 | 5.82E-27   |
| C5orf51   | 226159_at    | 15.99 | 1.16E-21   |
| MRPL42    | 217919_s_at  | 15.98 | 3.40E-28   |
| M6PR      | 200900_s_at  | 15.96 | 2.25E-25   |
| CDKN3     | 1555758_a_at | 15.96 | < 2.90E-44 |
| LRRC42    | 215084_s_at  | 15.94 | 1.57E-38   |
| PHB       | 200658_s_at  | 15.93 | 1.75E-22   |
| MCM7      | 210983_s_at  | 15.93 | 1.15E-28   |
| VCP       | 208649_s_at  | 15.91 | 3.92E-29   |
| MPV17     | 203466_at    | 15.89 | 5.39E-26   |
| HNRNPD    | 209330_s_at  | 15.88 | 3.22E-19   |
| TM9SF1    | 209150_s_at  | 15.88 | 5.83E-23   |
| POLR2I    | 212955_s_at  | 15.88 | 1.86E-24   |
| RABGAP1   | 213313_at    | 15.88 | 3.18E-24   |
| IL13RA1   | 210904_s_at  | 15.87 | < 2.90E-44 |
| TMEM43    | 217795_s_at  | 15.83 | 2.23E-26   |
| MINOS1    | 224867_at    | 15.83 | 2.52E-22   |
| CERS2     | 222212_s_at  | 15.82 | 6.23E-30   |
| LRP10     | 201412_at    | 15.82 | 9.31E-25   |
| UXT       | 218495_at    | 15.81 | 2.13E-22   |
| RNF14     | 201823_s_at  | 15.81 | 8.24E-37   |
| SEPW1     | 201194_at    | 15.81 | 8.26E-28   |
| HNRNPA2B1 | 205292_s_at  | 15.80 | 3.89E-19   |
| EID1      | 208669_s_at  | 15.77 | 4.05E-17   |



|         |             |       |            |
|---------|-------------|-------|------------|
| FUCA2   | 223120_at   | 15.76 | 2.21E-31   |
| BRD4    | 202102_s_at | 15.74 | 2.64E-19   |
| MFF     | 223354_x_at | 15.74 | 3.84E-35   |
| SCRG1   | 205475_at   | 15.72 | 1.44E-33   |
| NEMF    | 1557950_at  | 15.71 | < 2.90E-44 |
| ATXN10  | 208833_s_at | 15.71 | 4.27E-24   |
| HOXC10  | 218959_at   | 15.66 | 5.70E-44   |
| MAGOH   | 210092_at   | 15.66 | 3.23E-30   |
| TMEM30A | 232591_s_at | 15.66 | 1.51E-35   |
| CD81    | 200675_at   | 15.64 | 2.30E-22   |
| EZR     | 217234_s_at | 15.62 | 2.52E-27   |
| DUT     | 209932_s_at | 15.61 | 1.25E-21   |
| PLEKHO1 | 218223_s_at | 15.60 | 2.81E-26   |
| TAF9    | 202168_at   | 15.60 | 4.87E-28   |
| CCNA2   | 203418_at   | 15.60 | < 2.90E-44 |
| MAPRE1  | 200713_s_at | 15.57 | 9.68E-25   |
| NGRN    | 224281_s_at | 15.57 | 2.66E-38   |
| ARL2BP  | 202092_s_at | 15.56 | 4.82E-31   |
| GNPNAT1 | 225853_at   | 15.55 | 9.98E-30   |
| EEF1A1  | 204892_x_at | 15.54 | 1.05E-20   |
| SS18    | 202817_s_at | 15.53 | < 2.90E-44 |
| TGM2    | 201042_at   | 15.52 | 4.63E-21   |
| SLC35B4 | 225881_at   | 15.51 | 1.67E-28   |
| PIGY    | 224660_at   | 15.48 | 6.35E-20   |
| NDUFA4  | 217773_s_at | 15.48 | 1.65E-17   |
| RNF7    | 218286_s_at | 15.48 | 8.26E-24   |
| APCDD1L | 235548_at   | 15.46 | 5.78E-42   |
| HNRNPK  | 200097_s_at | 15.46 | 1.11E-18   |
| ATP5J   | 202325_s_at | 15.45 | 4.74E-23   |
| PPP4C   | 208932_at   | 15.44 | 5.66E-26   |
| EIF3A   | 200596_s_at | 15.43 | 8.30E-20   |
| ANXA4   | 201301_s_at | 15.41 | 5.68E-20   |
| PDLIM5  | 216804_s_at | 15.41 | 3.31E-18   |
| RBM39   | 208720_s_at | 15.40 | 3.79E-26   |
| MRPS33  | 218654_s_at | 15.40 | 9.12E-26   |
| SNHG8   | 225220_at   | 15.39 | 3.19E-17   |
| GRHPR   | 201347_x_at | 15.39 | 7.91E-24   |
| LAMTOR3 | 217971_at   | 15.38 | 1.87E-23   |
| POLR2J  | 212782_x_at | 15.38 | 1.11E-26   |
| PPAP2A  | 209147_s_at | 15.38 | 8.66E-28   |
| NHP2    | 209104_s_at | 15.38 | 5.93E-23   |

|          |              |       |            |
|----------|--------------|-------|------------|
| SYT11    | 209198_s_at  | 15.38 | 4.21E-28   |
| AREL1    | 202128_at    | 15.37 | 4.14E-38   |
| MANBAL   | 224689_at    | 15.37 | 6.74E-24   |
| MRPS18B  | 208907_s_at  | 15.36 | 4.76E-40   |
| HNRNPU   | 200594_x_at  | 15.35 | 1.48E-25   |
| PAFAH1B1 | 200815_s_at  | 15.35 | 1.89E-29   |
| PSMD3    | 201388_at    | 15.34 | 7.41E-39   |
| HSPA1A   | 202581_at    | 15.34 | 1.43E-13   |
| GTPBP4   | 218238_at    | 15.34 | 8.70E-26   |
| C6orf120 | 221786_at    | 15.34 | 8.61E-17   |
| DCUN1D5  | 223151_at    | 15.33 | 1.26E-19   |
| C1orf85  | 1558693_s_at | 15.33 | 1.17E-27   |
| USP16    | 218386_x_at  | 15.32 | 5.78E-24   |
| INHBA    | 210511_s_at  | 15.32 | 4.93E-06   |
| STAU1    | 208948_s_at  | 15.32 | 1.62E-23   |
| SCUBE3   | 228407_at    | 15.32 | 8.23E-35   |
| C12orf5  | 219099_at    | 15.31 | 1.05E-24   |
| TBL1XR1  | 221428_s_at  | 15.31 | 8.40E-42   |
| KCTD15   | 222668_at    | 15.28 | 6.39E-19   |
| GRAMD3   | 218706_s_at  | 15.25 | 7.31E-25   |
| SH3PXD2B | 231823_s_at  | 15.25 | 1.19E-23   |
| HMGB1    | 200679_x_at  | 15.22 | 1.78E-19   |
| ID3      | 207826_s_at  | 15.22 | 3.96E-19   |
| DRAP1    | 203258_at    | 15.21 | 4.82E-35   |
| TADA3    | 215273_s_at  | 15.21 | 5.93E-27   |
| GOLGA7   | 1554167_a_at | 15.21 | 3.36E-40   |
| BLOC1S5  | 221253_s_at  | 15.19 | 4.97E-20   |
| PDLIM7   | 214121_x_at  | 15.18 | 1.02E-36   |
| MBD4     | 209580_s_at  | 15.18 | 6.24E-24   |
| PSMC2    | 201068_s_at  | 15.18 | 1.59E-24   |
| EIF4H    | 206621_s_at  | 15.16 | 9.11E-22   |
| ANAPC13  | 209001_s_at  | 15.16 | 1.65E-21   |
| RARS2    | 232902_s_at  | 15.16 | 2.13E-23   |
| PSMG2    | 218467_at    | 15.15 | 3.41E-24   |
| SEC23B   | 201583_s_at  | 15.15 | 4.43E-30   |
| BRI3     | 223376_s_at  | 15.14 | 1.25E-22   |
| ZFYVE21  | 219929_s_at  | 15.14 | < 2.90E-44 |
| RAB11A   | 200863_s_at  | 15.13 | 4.25E-22   |
| THUMPD3  | 225730_s_at  | 15.13 | 1.26E-35   |
| FAM115A  | 212979_s_at  | 15.12 | 5.09E-24   |
| PAPOLA   | 222035_s_at  | 15.12 | 5.19E-21   |

|           |              |       |            |
|-----------|--------------|-------|------------|
| PRMT5     | 217786_at    | 15.11 | 2.18E-25   |
| MPC2      | 202427_s_at  | 15.09 | 2.54E-29   |
| RAB8A     | 208819_at    | 15.09 | 4.46E-22   |
| GLIPR2    | 225604_s_at  | 15.08 | 5.30E-26   |
| AP1M1     | 223024_at    | 15.07 | 8.51E-25   |
| QSOX1     | 201482_at    | 15.06 | 9.21E-27   |
| OAZ2      | 201364_s_at  | 15.05 | 6.37E-33   |
| PRUNE2    | 212805_at    | 15.03 | 1.93E-19   |
| TOMM22    | 222474_s_at  | 15.03 | < 2.90E-44 |
| H2AFJ     | 225245_x_at  | 15.02 | 8.76E-23   |
| ZFP91     | 224636_at    | 15.02 | 1.45E-22   |
| SPRED2    | 212458_at    | 14.99 | 4.46E-27   |
| ABL1      | 202123_s_at  | 14.99 | 2.01E-26   |
| PDXK      | 202671_s_at  | 14.99 | 6.02E-22   |
| LOC128322 | 202397_at    | 14.98 | 3.60E-31   |
| GPNMB     | 201141_at    | 14.97 | 4.14E-09   |
| SMAGP     | 209679_s_at  | 14.96 | 2.84E-39   |
| TSG101    | 201758_at    | 14.96 | 4.83E-26   |
| TOR1AIP1  | 212408_at    | 14.95 | 3.96E-18   |
| MT2A      | 212185_x_at  | 14.94 | 6.08E-16   |
| SPPL2A    | 226353_at    | 14.92 | 9.91E-22   |
| DNAJB6    | 209015_s_at  | 14.90 | 6.42E-27   |
| RPL7A     | 224930_x_at  | 14.90 | 8.79E-23   |
| SNRPD1    | 202690_s_at  | 14.90 | 6.05E-25   |
| ERLIN2    | 221542_s_at  | 14.90 | < 2.90E-44 |
| UBE2A     | 201898_s_at  | 14.88 | 1.18E-33   |
| PTPN11    | 209896_s_at  | 14.87 | 5.75E-28   |
| PPP1R12A  | 201602_s_at  | 14.86 | 5.91E-33   |
| PXK       | 1552275_s_at | 14.85 | < 2.90E-44 |
| ATP2B1    | 209281_s_at  | 14.85 | 4.34E-26   |
| LYRM2     | 221311_x_at  | 14.85 | < 2.90E-44 |
| MDH2      | 209036_s_at  | 14.85 | 1.48E-24   |
| MAP3K13   | 226556_at    | 14.84 | 5.80E-23   |
| VASN      | 225867_at    | 14.84 | 1.84E-28   |
| SERPINF1  | 202283_at    | 14.83 | 5.06E-14   |
| PGM3      | 210041_s_at  | 14.83 | 8.80E-21   |
| GTF2A2    | 202678_at    | 14.82 | 6.20E-34   |
| RAC1      | 208641_s_at  | 14.81 | 2.57E-26   |
| PLAC9     | 227419_x_at  | 14.81 | 1.67E-43   |
| TPGS2     | 213617_s_at  | 14.78 | 4.79E-34   |
| AMOTL2    | 203002_at    | 14.78 | 8.08E-23   |

|          |              |       |            |
|----------|--------------|-------|------------|
| PSAT1    | 223062_s_at  | 14.77 | 1.30E-11   |
| MARS     | 201475_x_at  | 14.76 | 5.35E-31   |
| RDX      | 212397_at    | 14.75 | 1.77E-17   |
| SPTLC2   | 216202_s_at  | 14.75 | 1.14E-43   |
| BRD2     | 208686_s_at  | 14.74 | < 2.90E-44 |
| MAD1L1   | 204857_at    | 14.74 | 7.71E-39   |
| BBX      | 226331_at    | 14.73 | 1.32E-24   |
| ADI1     | 222400_s_at  | 14.73 | 1.27E-29   |
| IKBIP    | 227295_at    | 14.72 | 4.24E-14   |
| RPL13    | 212191_x_at  | 14.72 | 5.53E-18   |
| EIF4EBP1 | 221539_at    | 14.71 | 1.27E-29   |
| WDR45    | 209216_at    | 14.68 | 2.89E-24   |
| SLC1A4   | 209610_s_at  | 14.68 | 1.47E-27   |
| C11orf73 | 219979_s_at  | 14.66 | 2.04E-29   |
| APOA1BP  | 225427_s_at  | 14.65 | 2.93E-26   |
| TMEM248  | 218008_at    | 14.65 | 7.42E-23   |
| PAICS    | 201013_s_at  | 14.64 | 2.44E-18   |
| RAB10    | 222981_s_at  | 14.64 | 6.36E-17   |
| DPCD     | 1553976_a_at | 14.62 | 1.88E-20   |
| ANLN     | 222608_s_at  | 14.61 | 1.07E-15   |
| UQCRB    | 209066_x_at  | 14.60 | 3.12E-24   |
| GLRX2    | 219933_at    | 14.59 | 3.54E-32   |
| SRPX     | 204955_at    | 14.59 | 2.71E-15   |
| LIPA     | 201847_at    | 14.59 | 3.31E-15   |
| LAMTOR2  | 218291_at    | 14.58 | 3.34E-35   |
| GFPT1    | 202721_s_at  | 14.58 | 2.19E-31   |
| STAT3    | 208991_at    | 14.57 | 6.64E-20   |
| CHPT1    | 221675_s_at  | 14.53 | 1.36E-21   |
| TMEM41B  | 212623_at    | 14.52 | 3.17E-23   |
| TIMMDC1  | 223004_s_at  | 14.52 | 1.22E-21   |
| CDC42BPB | 217849_s_at  | 14.52 | < 2.90E-44 |
| PCNA     | 201202_at    | 14.49 | 9.29E-17   |
| MRPS36   | 224302_s_at  | 14.49 | 3.66E-31   |
| ESYT1    | 208858_s_at  | 14.49 | 5.38E-32   |
| COL8A1   | 214587_at    | 14.48 | 4.45E-30   |
| TMEM9B   | 222507_s_at  | 14.48 | < 2.90E-44 |
| SRP14    | 200007_at    | 14.47 | 7.37E-26   |
| SCOC     | 223341_s_at  | 14.46 | < 2.90E-44 |
| LRRC41   | 1555831_s_at | 14.44 | 2.26E-42   |
| GNAI2    | 201040_at    | 14.43 | 3.40E-23   |
| EHD2     | 45297_at     | 14.43 | 1.05E-28   |

|          |             |       |            |
|----------|-------------|-------|------------|
| GLUD2    | 215794_x_at | 14.42 | 2.47E-39   |
| AKIRIN1  | 222458_s_at | 14.42 | < 2.90E-44 |
| MFAP2    | 203417_at   | 14.42 | 1.37E-14   |
| ERLEC1   | 224630_at   | 14.42 | 7.42E-23   |
| TMX1     | 208097_s_at | 14.41 | 5.70E-44   |
| TERF2IP  | 201174_s_at | 14.38 | 1.84E-24   |
| TMEM87A  | 212202_s_at | 14.37 | 2.11E-25   |
| FAM162A  | 223193_x_at | 14.36 | 2.49E-21   |
| MXRA7    | 212509_s_at | 14.35 | 7.63E-21   |
| DYNLT1   | 201999_s_at | 14.35 | 3.84E-21   |
| ARL8B    | 222442_s_at | 14.34 | 9.10E-26   |
| MMGT1    | 225125_at   | 14.33 | 6.76E-21   |
| CCT8     | 200873_s_at | 14.32 | 8.27E-24   |
| NAA20    | 223040_at   | 14.32 | 4.53E-23   |
| IGFBP7   | 201162_at   | 14.31 | 6.00E-22   |
| UPF3A    | 206958_s_at | 14.31 | 9.18E-19   |
| PEF1     | 217923_at   | 14.29 | 2.48E-31   |
| ARL4C    | 202206_at   | 14.27 | 1.12E-18   |
| HSD17B12 | 217869_at   | 14.27 | 8.22E-26   |
| AP3M1    | 222516_at   | 14.26 | 8.76E-17   |
| ANKIB1   | 224687_at   | 14.25 | 1.58E-22   |
| MRPL36   | 224331_s_at | 14.24 | 1.04E-23   |
| SMIM15   | 224740_at   | 14.24 | 9.47E-16   |
| SETD5    | 221806_s_at | 14.23 | 2.50E-25   |
| IPO9     | 217885_at   | 14.23 | 8.74E-30   |
| USMG5    | 225413_at   | 14.23 | 9.41E-22   |
| GPS1     | 217782_s_at | 14.23 | 3.58E-39   |
| WASF2    | 224563_at   | 14.22 | 1.14E-43   |
| KPNA6    | 212103_at   | 14.22 | 2.60E-31   |
| GALNT5   | 236129_at   | 14.22 | 3.75E-17   |
| IDH3G    | 202471_s_at | 14.19 | 3.83E-25   |
| CHCHD5   | 223479_s_at | 14.18 | 3.17E-36   |
| TMEM181  | 225127_at   | 14.17 | 5.87E-20   |
| SRP54    | 203605_at   | 14.17 | 9.20E-23   |
| DNAJC21  | 238337_s_at | 14.17 | 1.62E-35   |
| RNF139   | 209510_at   | 14.13 | 1.12E-22   |
| OXSR1    | 202696_at   | 14.12 | 6.77E-21   |
| FAM21C   | 211068_x_at | 14.11 | 1.56E-28   |
| FAM171A1 | 212771_at   | 14.09 | 1.56E-24   |
| NDUFS3   | 201740_at   | 14.08 | 7.29E-26   |
| PPP2CB   | 201375_s_at | 14.08 | 8.20E-17   |

|              |              |       |            |
|--------------|--------------|-------|------------|
| NDUFA10      | 217860_at    | 14.06 | 9.85E-22   |
| WNT5B        | 221029_s_at  | 14.06 | 1.60E-28   |
| C14orf166    | 217768_at    | 14.06 | 1.07E-20   |
| ITGB1BP1     | 203336_s_at  | 14.06 | 1.11E-22   |
| SURF1        | 204295_at    | 14.05 | 6.33E-29   |
| LOC101060373 | 221853_s_at  | 14.04 | 5.93E-27   |
| ASAH1        | 1555419_a_at | 14.04 | 2.01E-25   |
| ACTR10       | 222230_s_at  | 14.03 | 1.62E-17   |
| HLA-B        | 211911_x_at  | 14.02 | 2.91E-17   |
| PLAA         | 209533_s_at  | 14.01 | 1.73E-33   |
| SMURF2       | 205596_s_at  | 14.00 | 1.69E-18   |
| SPDL1        | 221685_s_at  | 13.99 | 7.53E-31   |
| HMG4         | 202579_x_at  | 13.99 | 3.06E-26   |
| RRBP1        | 201204_s_at  | 13.99 | 2.93E-22   |
| CBFB         | 202370_s_at  | 13.98 | 5.92E-17   |
| SWI5         | 226027_at    | 13.97 | 1.52E-31   |
| CKS2         | 204170_s_at  | 13.96 | 5.71E-13   |
| RPL26L1      | 218830_at    | 13.95 | 3.85E-27   |
| MSANTD3      | 1552277_a_at | 13.94 | 9.13E-37   |
| AURKAIP1     | 225552_x_at  | 13.94 | 2.10E-20   |
| MRPS15       | 221437_s_at  | 13.94 | 3.43E-28   |
| CLIC4        | 201559_s_at  | 13.93 | 8.04E-32   |
| RPL17        | 200038_s_at  | 13.93 | 2.04E-20   |
| EIF3E        | 208697_s_at  | 13.93 | 2.43E-18   |
| MYC          | 202431_s_at  | 13.93 | 4.50E-21   |
| GLG1         | 214730_s_at  | 13.91 | 2.80E-20   |
| BICC1        | 213429_at    | 13.90 | 3.51E-14   |
| RAB5C        | 201156_s_at  | 13.90 | < 2.90E-44 |
| PDHA1        | 200980_s_at  | 13.90 | 3.15E-24   |
| KIF13A       | 235072_s_at  | 13.90 | 3.43E-16   |
| TFB2M        | 218605_at    | 13.89 | 1.92E-24   |
| IQGAP1       | 200791_s_at  | 13.88 | 4.61E-19   |
| KRT34        | 206969_at    | 13.86 | 6.98E-35   |
| FNTA         | 209471_s_at  | 13.85 | 2.79E-22   |
| SMIM7        | 224717_s_at  | 13.85 | 3.77E-24   |
| PSMA5        | 201274_at    | 13.84 | 9.95E-25   |
| GPR176       | 227846_at    | 13.82 | 6.76E-24   |
| IRF2BP2      | 224571_at    | 13.82 | 3.17E-18   |
| PPP2R5C      | 1554365_a_at | 13.81 | < 2.90E-44 |
| FKBP3        | 218003_s_at  | 13.80 | 2.45E-25   |
| MGAT2        | 203102_s_at  | 13.78 | 1.57E-16   |

|              |             |       |            |
|--------------|-------------|-------|------------|
| TM2D2        | 224413_s_at | 13.77 | 3.03E-22   |
| CMPK1        | 217870_s_at | 13.75 | 2.37E-16   |
| HEBP1        | 218450_at   | 13.75 | 3.67E-19   |
| DERL1        | 218172_s_at | 13.74 | 2.72E-24   |
| TTL          | 224896_s_at | 13.73 | 2.41E-27   |
| KLF13        | 225390_s_at | 13.73 | 6.73E-22   |
| REXO2        | 223989_s_at | 13.72 | 1.20E-27   |
| AIDA         | 220199_s_at | 13.71 | 5.23E-21   |
| HMG2         | 208668_x_at | 13.71 | 1.36E-23   |
| RBM14        | 200997_at   | 13.70 | 2.49E-22   |
| C6orf89      | 224977_at   | 13.69 | 4.49E-25   |
| CETN2        | 209194_at   | 13.68 | 1.03E-21   |
| PEX3         | 203972_s_at | 13.67 | 1.41E-38   |
| FAM171B      | 227370_at   | 13.67 | 1.15E-17   |
| EMC8         | 218057_x_at | 13.67 | 5.83E-36   |
| SOX9         | 202936_s_at | 13.67 | 3.24E-26   |
| ALAS1        | 205633_s_at | 13.65 | 2.90E-25   |
| CIRH1A       | 230656_s_at | 13.65 | 3.73E-31   |
| ABCF2        | 207622_s_at | 13.64 | 1.48E-40   |
| DCAF10       | 222804_x_at | 13.63 | 1.08E-30   |
| MEX3D        | 91816_f_at  | 13.62 | < 2.90E-44 |
| TCTN3        | 212121_at   | 13.61 | 2.56E-25   |
| ASL          | 204608_at   | 13.61 | 7.21E-28   |
| LOC101060478 | 212742_at   | 13.59 | 3.93E-33   |
| ETHE1        | 204034_at   | 13.59 | 7.61E-31   |
| UTP11L       | 218235_s_at | 13.59 | 1.27E-40   |
| PRRX1        | 226695_at   | 13.58 | 1.29E-07   |
| MBD2         | 202484_s_at | 13.57 | 4.14E-20   |
| NONO         | 208698_s_at | 13.57 | 1.74E-24   |
| ST13         | 207040_s_at | 13.56 | 4.62E-19   |
| S100A11P1    | 208540_x_at | 13.52 | 2.66E-36   |
| ITM2B        | 217732_s_at | 13.52 | 1.39E-19   |
| NSA2         | 201922_at   | 13.52 | 2.15E-19   |
| UBE2T        | 223229_at   | 13.51 | 1.33E-37   |
| TRIB2        | 202478_at   | 13.51 | 1.44E-17   |
| ADSL         | 210250_x_at | 13.51 | 4.90E-21   |
| ADAM10       | 214895_s_at | 13.50 | 1.72E-41   |
| RPS20        | 200949_x_at | 13.50 | 4.69E-24   |
| DSP          | 200606_at   | 13.49 | 2.42E-13   |
| RPRD1A       | 222559_s_at | 13.49 | 5.33E-27   |
| PTS          | 209694_at   | 13.48 | 3.61E-21   |

|          |              |       |            |
|----------|--------------|-------|------------|
| AK3      | 224655_at    | 13.48 | 9.57E-19   |
| MFSD5    | 212861_at    | 13.46 | 1.44E-33   |
| LARP1    | 212137_at    | 13.46 | 2.75E-25   |
| VPS25    | 224608_s_at  | 13.46 | 3.15E-33   |
| EXOSC3   | 223490_s_at  | 13.44 | 3.43E-40   |
| RPL24    | 200013_at    | 13.43 | 7.32E-20   |
| RSPRY1   | 225774_at    | 13.42 | 2.45E-30   |
| CD151    | 204306_s_at  | 13.41 | 1.57E-26   |
| TM4SF1   | 215034_s_at  | 13.41 | 9.56E-13   |
| MED28    | 218438_s_at  | 13.38 | 4.22E-24   |
| FKBP9    | 212169_at    | 13.38 | 1.70E-23   |
| HK1      | 200697_at    | 13.38 | 1.20E-28   |
| SEC23A   | 204344_s_at  | 13.37 | < 2.90E-44 |
| PAPSS2   | 203058_s_at  | 13.37 | 7.90E-18   |
| ANTXR1   | 220092_s_at  | 13.36 | 2.71E-28   |
| KCTD20   | 223176_at    | 13.36 | 1.52E-22   |
| BABAM1   | 221711_s_at  | 13.36 | 3.59E-29   |
| PCNP     | 1554868_s_at | 13.35 | 1.19E-32   |
| NFE2L2   | 201146_at    | 13.35 | 3.70E-18   |
| NME7     | 219553_at    | 13.33 | 5.45E-17   |
| SRPRB    | 218140_x_at  | 13.33 | 1.90E-18   |
| TDP2     | 202266_at    | 13.33 | 4.04E-16   |
| ALDH18A1 | 217791_s_at  | 13.31 | 1.67E-26   |
| NMT2     | 205005_s_at  | 13.31 | 7.25E-24   |
| PPP3CA   | 202429_s_at  | 13.31 | 3.05E-15   |
| CDK5     | 204247_s_at  | 13.30 | 8.46E-33   |
| MAGED4   | 223313_s_at  | 13.30 | 9.72E-19   |
| RAB23    | 220955_x_at  | 13.29 | < 2.90E-44 |
| NDUFB11  | 218320_s_at  | 13.28 | 8.16E-25   |
| GLOD4    | 209092_s_at  | 13.26 | 3.20E-22   |
| KRCC1    | 222585_x_at  | 13.26 | 7.08E-33   |
| COX8A    | 201119_s_at  | 13.26 | 5.61E-26   |
| NUDT3    | 221579_s_at  | 13.25 | < 2.90E-44 |
| GOLM1    | 217771_at    | 13.24 | 6.15E-18   |
| C7orf50  | 224478_s_at  | 13.24 | 9.76E-28   |
| PPP1R2   | 202166_s_at  | 13.23 | 1.20E-18   |
| LSM2     | 209449_at    | 13.23 | 1.21E-27   |
| FLG      | 215704_at    | 13.22 | 1.27E-20   |
| SMAD3    | 218284_at    | 13.22 | 1.65E-26   |
| C7orf10  | 219655_at    | 13.22 | 1.23E-11   |
| UGCG     | 224967_at    | 13.20 | 2.57E-12   |



|              |             |       |            |
|--------------|-------------|-------|------------|
| PKP4         | 201929_s_at | 13.19 | < 2.90E-44 |
| CRKL         | 212180_at   | 13.17 | 5.01E-21   |
| PURA         | 204021_s_at | 13.17 | 3.10E-18   |
| MRPL41       | 227186_s_at | 13.15 | 7.02E-20   |
| SMTN         | 209427_at   | 13.14 | 5.48E-30   |
| HIP1         | 205425_at   | 13.13 | < 2.90E-44 |
| NUFIP2       | 224956_at   | 13.13 | 6.50E-27   |
| NUDCD2       | 226642_s_at | 13.12 | 3.65E-19   |
| LOC100506538 | 235509_at   | 13.10 | 1.50E-19   |
| DNM1L        | 203105_s_at | 13.10 | 1.48E-30   |
| DOCK7        | 225384_at   | 13.09 | 6.84E-19   |
| MRPL4        | 223743_s_at | 13.08 | < 2.90E-44 |
| ARIH2        | 201229_s_at | 13.07 | 1.72E-40   |
| CSNK1A1      | 213860_x_at | 13.07 | 1.10E-21   |
| RPS10        | 211542_x_at | 13.06 | 4.29E-22   |
| TMEM219      | 224981_at   | 13.05 | 1.20E-26   |
| PIGG         | 218652_s_at | 13.04 | 5.28E-24   |
| ARCN1        | 201176_s_at | 13.02 | 3.06E-21   |
| SELO         | 233167_at   | 13.02 | 9.39E-34   |
| LGALS3       | 208949_s_at | 13.02 | 3.59E-19   |
| PERP         | 222392_x_at | 13.02 | 3.49E-17   |
| ERLIN1       | 202441_at   | 13.01 | 1.33E-23   |
| MED31        | 222867_s_at | 13.00 | 4.48E-33   |
| TCF25        | 221495_s_at | 13.00 | 1.58E-25   |
| BZW1         | 200776_s_at | 12.99 | 8.38E-25   |
| DLST         | 215210_s_at | 12.97 | 1.71E-36   |
| C19orf10     | 216483_s_at | 12.97 | 3.03E-22   |
| BHLHE40      | 201170_s_at | 12.96 | 4.64E-15   |
| FAS          | 215719_x_at | 12.95 | < 2.90E-44 |
| NDFIP1       | 217800_s_at | 12.94 | 1.02E-19   |
| GATAD1       | 208503_s_at | 12.92 | 2.85E-35   |
| DVL3         | 201908_at   | 12.92 | 1.55E-25   |
| CLPTM1       | 211136_s_at | 12.90 | < 2.90E-44 |
| LSMD1        | 224512_s_at | 12.90 | 2.59E-24   |
| PELO         | 218472_s_at | 12.90 | 2.59E-27   |
| MID1         | 203636_at   | 12.89 | 4.14E-19   |
| PRCP         | 201494_at   | 12.89 | 5.31E-27   |
| TMEM258      | 218213_s_at | 12.89 | 7.75E-20   |
| TMED5        | 202194_at   | 12.89 | 2.01E-14   |
| DCTN3        | 204246_s_at | 12.88 | 4.53E-20   |
| CAT          | 201432_at   | 12.87 | 4.60E-26   |

|          |              |       |            |
|----------|--------------|-------|------------|
| LARS     | 222427_s_at  | 12.87 | 7.42E-25   |
| SOX4     | 201417_at    | 12.86 | 3.48E-15   |
| KPNB1    | 213803_at    | 12.85 | 4.28E-23   |
| INSIG2   | 209566_at    | 12.85 | 2.77E-20   |
| AKR1C3   | 209160_at    | 12.85 | 1.58E-13   |
| PAR-SN   | 206042_x_at  | 12.84 | 2.70E-34   |
| ENC1     | 201341_at    | 12.82 | 1.54E-12   |
| MRPL52   | 226241_s_at  | 12.81 | 8.22E-25   |
| PPP1R11  | 1566303_s_at | 12.79 | 4.86E-29   |
| VDAC2    | 211662_s_at  | 12.78 | 1.86E-24   |
| ERP44    | 208959_s_at  | 12.78 | 2.24E-21   |
| PRKRA    | 209139_s_at  | 12.78 | 8.58E-26   |
| WSB1     | 210561_s_at  | 12.78 | 3.80E-24   |
| NUCKS1   | 224582_s_at  | 12.77 | 2.90E-44   |
| UBFD1    | 224878_at    | 12.76 | 4.75E-27   |
| COMMD6   | 225312_at    | 12.76 | 1.45E-22   |
| SMIM14   | 224990_at    | 12.76 | 1.26E-25   |
| ARF3     | 200734_s_at  | 12.76 | 3.14E-17   |
| OAT      | 201599_at    | 12.76 | 8.45E-17   |
| SRA1     | 224130_s_at  | 12.75 | 1.94E-29   |
| CYB5R3   | 1554574_a_at | 12.75 | < 2.90E-44 |
| RGS4     | 204337_at    | 12.75 | 7.12E-11   |
| MIOS     | 206860_s_at  | 12.74 | 4.09E-25   |
| SNRNP25  | 218493_at    | 12.73 | 7.12E-25   |
| PRDX2    | 39729_at     | 12.72 | 1.88E-18   |
| S100A16  | 227998_at    | 12.72 | 9.64E-27   |
| LTA4H    | 208771_s_at  | 12.71 | 3.13E-19   |
| PYGL     | 202990_at    | 12.71 | 1.82E-17   |
| GNS      | 212335_at    | 12.71 | 7.39E-19   |
| OGFOD1   | 225106_s_at  | 12.71 | 2.28E-41   |
| UBE2H    | 222420_s_at  | 12.70 | 6.27E-22   |
| DNPH1    | 204238_s_at  | 12.69 | 3.90E-25   |
| PPIL3    | 224364_s_at  | 12.68 | 1.79E-18   |
| PLD3     | 201050_at    | 12.68 | 2.94E-22   |
| KLHDC2   | 217906_at    | 12.65 | 1.17E-22   |
| CTDSPL2  | 223271_s_at  | 12.65 | 1.33E-33   |
| HAUS1    | 225297_at    | 12.64 | 3.42E-29   |
| ATP6V1C1 | 202874_s_at  | 12.64 | 7.01E-35   |
| SLC7A1   | 212295_s_at  | 12.64 | 5.08E-20   |
| CUL4B    | 202213_s_at  | 12.62 | 2.18E-30   |
| BCAP31   | 200837_at    | 12.62 | 8.44E-25   |

|          |             |       |            |
|----------|-------------|-------|------------|
| PIGK     | 227639_at   | 12.62 | 5.33E-16   |
| NAP1L5   | 228062_at   | 12.61 | 2.66E-20   |
| C15orf61 | 229742_at   | 12.60 | 1.13E-19   |
| ADD1     | 214736_s_at | 12.59 | 1.44E-24   |
| HSPH1    | 208744_x_at | 12.59 | 3.08E-34   |
| FBXO21   | 212229_s_at | 12.58 | 7.45E-15   |
| NBR1     | 201384_s_at | 12.58 | 2.73E-20   |
| TXNDC9   | 203008_x_at | 12.57 | 6.66E-14   |
| DRAM2    | 225230_at   | 12.57 | 8.03E-23   |
| MRPS18C  | 228019_s_at | 12.57 | 4.11E-36   |
| MTFMT    | 235689_at   | 12.57 | < 2.90E-44 |
| INTS12   | 218616_at   | 12.56 | 3.10E-26   |
| MCFD2    | 212246_at   | 12.56 | 2.11E-40   |
| HBS1L    | 209316_s_at | 12.56 | 1.75E-26   |
| EEF1G    | 200689_x_at | 12.56 | 5.42E-21   |
| IFT43    | 226195_at   | 12.55 | 1.74E-26   |
| RPL5     | 200937_s_at | 12.55 | 1.08E-19   |
| MGLL     | 211026_s_at | 12.55 | 2.17E-30   |
| OSBPL1A  | 209485_s_at | 12.55 | 7.60E-17   |
| RMND1    | 220329_s_at | 12.54 | 3.23E-37   |
| EEF1D    | 203113_s_at | 12.53 | 4.65E-18   |
| MVP      | 202180_s_at | 12.52 | 4.52E-26   |
| GPX7     | 213170_at   | 12.52 | 6.23E-23   |
| GOLGA2   | 204384_at   | 12.52 | 7.23E-24   |
| RPS19    | 213414_s_at | 12.51 | 1.84E-21   |
| FYTTD1   | 224641_at   | 12.51 | 2.12E-16   |
| DDX3Y    | 205000_at   | 12.50 | 8.43E-32   |
| STK38    | 202951_at   | 12.50 | 3.22E-23   |
| RALY     | 201271_s_at | 12.49 | 1.10E-21   |
| ATP8B2   | 226771_at   | 12.49 | 1.62E-27   |
| LANCL1   | 202020_s_at | 12.48 | 1.26E-20   |
| ACTR1A   | 200721_s_at | 12.47 | 3.53E-33   |
| B9D1     | 210534_s_at | 12.46 | < 2.90E-44 |
| PGM1     | 201968_s_at | 12.45 | 5.94E-16   |
| MRPL23   | 213897_s_at | 12.44 | 1.83E-24   |
| HEXA     | 201765_s_at | 12.43 | 4.01E-27   |
| MED6     | 210104_at   | 12.42 | < 2.90E-44 |
| ELN      | 212670_at   | 12.41 | 3.15E-30   |
| MRPS14   | 203800_s_at | 12.41 | 7.33E-22   |
| COG5     | 203630_s_at | 12.41 | 2.62E-21   |
| AJUBA    | 225806_at   | 12.41 | 2.32E-16   |

|              |              |       |            |
|--------------|--------------|-------|------------|
| SPATS2L      | 222154_s_at  | 12.41 | 8.57E-19   |
| CACYBP       | 210691_s_at  | 12.39 | 1.03E-31   |
| SAP30        | 204900_x_at  | 12.39 | 3.39E-28   |
| LGALS8       | 208933_s_at  | 12.38 | 6.42E-22   |
| SLC44A1      | 224595_at    | 12.38 | 3.97E-16   |
| TRIM8        | 223132_s_at  | 12.37 | 4.40E-24   |
| SNX5         | 222417_s_at  | 12.37 | 5.49E-20   |
| EIF2S3       | 205321_at    | 12.37 | 4.34E-38   |
| FBXW2        | 218941_at    | 12.36 | 9.14E-34   |
| XYLT1        | 213725_x_at  | 12.36 | 4.41E-13   |
| CDC123       | 201725_at    | 12.35 | 3.62E-24   |
| DENND5A      | 212561_at    | 12.34 | 1.76E-25   |
| OSTF1        | 204479_at    | 12.34 | 1.05E-23   |
| TACC1        | 1554690_a_at | 12.34 | 4.03E-34   |
| LOC100996496 | 201586_s_at  | 12.33 | 1.93E-18   |
| SEC61A1      | 217716_s_at  | 12.33 | 6.09E-25   |
| FASTKD2      | 216996_s_at  | 12.32 | 3.95E-33   |
| RSU1         | 201980_s_at  | 12.32 | 4.11E-17   |
| ARMC1        | 218185_s_at  | 12.32 | 7.96E-24   |
| UQCR10       | 218190_s_at  | 12.31 | 2.69E-23   |
| DR1          | 207654_x_at  | 12.31 | 1.32E-32   |
| DNAJA2       | 209157_at    | 12.31 | 6.65E-23   |
| NDUFB9       | 222992_s_at  | 12.30 | 7.77E-20   |
| PI4K2A       | 209345_s_at  | 12.30 | 1.66E-34   |
| HYOU1        | 200825_s_at  | 12.30 | 5.00E-31   |
| TPX2         | 210052_s_at  | 12.30 | 1.72E-27   |
| MEGF6        | 226869_at    | 12.29 | 2.22E-27   |
| YIPF3        | 216338_s_at  | 12.27 | 8.45E-29   |
| NSFL1C       | 220248_x_at  | 12.27 | 1.17E-29   |
| PEX2         | 210296_s_at  | 12.27 | 8.88E-16   |
| CCDC132      | 226031_at    | 12.27 | 6.37E-32   |
| NPM1         | 221691_x_at  | 12.26 | 1.11E-17   |
| TXLNA        | 212300_at    | 12.24 | 6.88E-31   |
| URI1         | 211563_s_at  | 12.24 | 5.55E-28   |
| MBTPS1       | 201620_at    | 12.23 | 3.72E-24   |
| BCCIP        | 227322_s_at  | 12.23 | 1.63E-25   |
| ASPM         | 219918_s_at  | 12.23 | 1.18E-23   |
| LTBP1        | 202728_s_at  | 12.22 | 1.12E-26   |
| RSL1D1       | 212018_s_at  | 12.22 | 5.46E-23   |
| TRAPPC4      | 217958_at    | 12.21 | 1.06E-22   |
| SIX2         | 206510_at    | 12.21 | < 2.90E-44 |

|              |             |       |          |
|--------------|-------------|-------|----------|
| SDHC         | 210131_x_at | 12.21 | 1.66E-26 |
| DONSON       | 221677_s_at | 12.20 | 6.41E-37 |
| MED17        | 221517_s_at | 12.19 | 2.44E-23 |
| CAMTA1       | 225693_s_at | 12.19 | 3.28E-21 |
| TMEM9        | 222987_s_at | 12.18 | 2.84E-34 |
| ATRAID       | 219329_s_at | 12.18 | 2.87E-23 |
| RNF145       | 226077_at   | 12.16 | 2.22E-22 |
| UXS1         | 225583_at   | 12.15 | 2.84E-23 |
| TUB          | 228882_at   | 12.15 | 1.64E-29 |
| C3orf38      | 226524_at   | 12.14 | 3.21E-31 |
| ATP2B4       | 212136_at   | 12.14 | 1.66E-18 |
| YPEL5        | 222408_s_at | 12.13 | 1.05E-26 |
| RIOK2        | 218535_s_at | 12.13 | 5.34E-27 |
| HLTF         | 202983_at   | 12.11 | 5.19E-21 |
| TCEA2        | 203919_at   | 12.10 | 3.97E-24 |
| SNTB1        | 226438_at   | 12.10 | 3.62E-27 |
| CUL1         | 207614_s_at | 12.10 | 8.14E-29 |
| SAP18        | 208742_s_at | 12.10 | 1.55E-29 |
| GEMIN7       | 222821_s_at | 12.09 | 7.94E-42 |
| ANAPC5       | 208722_s_at | 12.09 | 1.52E-26 |
| HTRA1        | 201185_at   | 12.09 | 1.09E-18 |
| CHCHD1       | 226896_at   | 12.09 | 6.08E-22 |
| ASF1A        | 203428_s_at | 12.08 | 3.09E-22 |
| MNF1         | 224448_s_at | 12.08 | 2.05E-24 |
| PRRC1        | 224643_at   | 12.07 | 3.06E-14 |
| LOC100996747 | 217753_s_at | 12.07 | 4.01E-15 |
| RPS24        | 200061_s_at | 12.07 | 3.38E-21 |
| UBE2B        | 211763_s_at | 12.06 | 1.39E-19 |
| NDUFA3       | 218563_at   | 12.04 | 1.68E-21 |
| POGK         | 218229_s_at | 12.03 | 1.39E-29 |
| FOXC2        | 239058_at   | 12.02 | 6.22E-36 |
| ITGA11       | 222899_at   | 12.02 | 4.66E-11 |
| NF2          | 218915_at   | 12.02 | 6.14E-34 |
| MED30        | 227787_s_at | 12.01 | 1.28E-23 |
| EIF3H        | 201592_at   | 12.01 | 3.43E-20 |
| LEPROTL1     | 202595_s_at | 12.00 | 5.35E-27 |
| TAF12        | 209463_s_at | 11.99 | 2.19E-43 |
| OSMR         | 226621_at   | 11.97 | 6.49E-19 |
| FUNDC2       | 223042_s_at | 11.97 | 1.31E-21 |
| MLEC         | 200616_s_at | 11.96 | 5.93E-20 |
| EPAS1        | 200878_at   | 11.96 | 2.10E-13 |

|          |              |       |            |
|----------|--------------|-------|------------|
| RAB3B    | 205924_at    | 11.96 | < 2.90E-44 |
| RPA3     | 209507_at    | 11.96 | 1.44E-30   |
| KIFAP3   | 203333_at    | 11.95 | 7.19E-21   |
| PSIP1    | 205961_s_at  | 11.93 | 7.27E-19   |
| JMJD6    | 212722_s_at  | 11.93 | 7.51E-26   |
| DERL2    | 218333_at    | 11.93 | 4.71E-26   |
| E2F7     | 228033_at    | 11.93 | 1.92E-24   |
| UBAC1    | 202151_s_at  | 11.93 | 4.67E-28   |
| CLNS1A   | 209143_s_at  | 11.93 | 1.07E-20   |
| FAM69A   | 216044_x_at  | 11.92 | 5.01E-11   |
| APPL2    | 218218_at    | 11.92 | 2.23E-41   |
| PLA2G4A  | 210145_at    | 11.91 | 1.81E-27   |
| FZD7     | 203705_s_at  | 11.90 | 6.12E-14   |
| RRP36    | 225788_at    | 11.90 | 1.25E-23   |
| SMAD4    | 202527_s_at  | 11.88 | 3.63E-21   |
| STEAP1   | 205542_at    | 11.88 | 1.25E-11   |
| POP4     | 202868_s_at  | 11.87 | 1.47E-25   |
| CCDC50   | 225331_at    | 11.87 | 1.65E-19   |
| NASP     | 201970_s_at  | 11.86 | 1.61E-19   |
| DTD1     | 234107_s_at  | 11.86 | 1.28E-26   |
| SNX1     | 214531_s_at  | 11.86 | 3.64E-28   |
| KIAA0101 | 202503_s_at  | 11.86 | 6.20E-09   |
| MSH6     | 211450_s_at  | 11.85 | < 2.90E-44 |
| SSSCA1   | 203114_at    | 11.84 | 3.06E-29   |
| CGGBP1   | 224600_at    | 11.84 | 4.80E-38   |
| BCAP29   | 225677_at    | 11.84 | 2.63E-29   |
| DLX1     | 242138_at    | 11.83 | < 2.90E-44 |
| CCDC142  | 225523_at    | 11.83 | 1.50E-18   |
| GMPR2    | 217990_at    | 11.83 | 2.81E-17   |
| NDUFA2   | 209224_s_at  | 11.83 | 5.05E-21   |
| ZNHIT1   | 201541_s_at  | 11.82 | 4.86E-27   |
| C16orf80 | 217957_at    | 11.82 | 6.70E-27   |
| BCAT1    | 214452_at    | 11.82 | 1.59E-13   |
| DPF2     | 202116_at    | 11.81 | 2.59E-20   |
| RBM7     | 218379_at    | 11.81 | 2.63E-23   |
| KPNA1    | 202059_s_at  | 11.79 | 7.57E-25   |
| HIBADH   | 224812_at    | 11.79 | 4.17E-24   |
| MAD2L1   | 1554768_a_at | 11.77 | < 2.90E-44 |
| C11orf70 | 224463_s_at  | 11.77 | 2.06E-27   |
| TMEM138  | 223113_at    | 11.77 | 2.06E-29   |
| FBL      | 211623_s_at  | 11.76 | 7.89E-19   |

|           |              |       |            |
|-----------|--------------|-------|------------|
| C19orf53  | 217926_at    | 11.76 | 1.43E-22   |
| MMP14     | 160020_at    | 11.75 | 6.05E-36   |
| UBE2D2    | 201345_s_at  | 11.75 | 1.53E-25   |
| METTL23   | 225808_at    | 11.73 | 1.53E-26   |
| ACBD6     | 225317_at    | 11.73 | 7.68E-26   |
| NCOR2     | 207760_s_at  | 11.73 | 3.68E-23   |
| ASNSD1    | 217987_at    | 11.73 | 4.62E-19   |
| CCDC6     | 225010_at    | 11.71 | 4.51E-13   |
| PNMA1     | 218224_at    | 11.71 | 4.32E-20   |
| CCT4      | 200877_at    | 11.70 | 6.63E-18   |
| C14orf1   | 217188_s_at  | 11.70 | < 2.90E-44 |
| PSMA4     | 203396_at    | 11.69 | 1.03E-23   |
| PRKDC     | 208694_at    | 11.69 | 2.78E-18   |
| SERAC1    | 232183_at    | 11.68 | 8.61E-35   |
| HNRNPLL   | 225386_s_at  | 11.68 | 1.26E-24   |
| CD164     | 208654_s_at  | 11.68 | 4.41E-15   |
| SRR       | 219204_s_at  | 11.68 | 7.89E-42   |
| IDH1      | 1555037_a_at | 11.67 | 1.45E-17   |
| MBNL1-AS1 | 232298_at    | 11.67 | 4.38E-31   |
| LMAN1     | 224629_at    | 11.66 | 1.12E-19   |
| BTG3      | 205548_s_at  | 11.66 | 3.84E-23   |
| MRPS30    | 218398_at    | 11.66 | 1.83E-26   |
| GUCD1     | 223039_at    | 11.66 | 1.39E-24   |
| MOB3A     | 225530_at    | 11.66 | 1.12E-27   |
| CLIP3     | 212358_at    | 11.66 | 8.65E-31   |
| TM2D1     | 211703_s_at  | 11.66 | 5.18E-24   |
| ZFAND2A   | 226650_at    | 11.65 | 3.88E-25   |
| TBC1D7    | 223461_at    | 11.62 | 3.77E-24   |
| PKD2      | 203688_at    | 11.62 | 2.87E-21   |
| HDAC1     | 201209_at    | 11.62 | 1.55E-21   |
| TWIST1    | 213943_at    | 11.62 | 7.47E-11   |
| DYNC1H1   | 211928_at    | 11.62 | 6.41E-26   |
| PDE1C     | 239218_at    | 11.62 | 2.15E-26   |
| DHCR7     | 201790_s_at  | 11.62 | 1.65E-35   |
| PSMC4     | 201252_at    | 11.61 | 6.47E-27   |
| CD109     | 226545_at    | 11.61 | 1.70E-10   |
| COX7C     | 213846_at    | 11.60 | 1.44E-24   |
| CREB3L2   | 212345_s_at  | 11.58 | 1.97E-26   |
| PTK7      | 207011_s_at  | 11.55 | 5.00E-36   |
| C14orf2   | 210532_s_at  | 11.54 | 1.51E-24   |
| CCDC22    | 206016_at    | 11.54 | 2.60E-39   |

|         |             |       |            |
|---------|-------------|-------|------------|
| CBLB    | 209682_at   | 11.53 | 1.17E-19   |
| IFITM3  | 212203_x_at | 11.52 | 2.79E-25   |
| DGUOK   | 203816_at   | 11.50 | 4.39E-36   |
| SRP72   | 208800_at   | 11.50 | 2.64E-24   |
| NAV1    | 224773_at   | 11.48 | 4.96E-30   |
| FOXO3   | 204132_s_at | 11.48 | 7.54E-42   |
| JAZF1   | 225798_at   | 11.47 | 2.11E-20   |
| SRRM1   | 201225_s_at | 11.47 | 2.21E-18   |
| MRPL54  | 225797_at   | 11.46 | 1.85E-29   |
| DNLZ    | 228272_at   | 11.46 | 1.60E-31   |
| PHF20L1 | 227523_s_at | 11.46 | 6.79E-23   |
| KRIT1   | 34031_i_at  | 11.46 | < 2.90E-44 |
| STAG2   | 207983_s_at | 11.46 | 3.65E-26   |
| CLEC3B  | 205200_at   | 11.45 | 5.30E-25   |
| IFITM1  | 201601_x_at | 11.44 | 2.26E-21   |
| RPL6    | 200034_s_at | 11.43 | 3.17E-21   |
| SLC2A10 | 221024_s_at | 11.42 | 2.99E-17   |
| TMEM119 | 227300_at   | 11.42 | 1.70E-24   |
| CDK2AP1 | 201938_at   | 11.41 | 2.07E-16   |
| CHTOP   | 202560_s_at | 11.41 | 8.37E-22   |
| RPS14   | 208645_s_at | 11.41 | 2.82E-20   |
| HMOX2   | 218120_s_at | 11.41 | 8.97E-35   |
| NDUFAF1 | 204125_at   | 11.41 | 1.58E-26   |
| DUSP14  | 203367_at   | 11.39 | 1.82E-30   |
| STIP1   | 213330_s_at | 11.39 | 1.01E-40   |
| CERCAM  | 224794_s_at | 11.38 | 1.25E-19   |
| DLGAP5  | 203764_at   | 11.36 | 7.93E-18   |
| SMARCA4 | 215714_s_at | 11.35 | 5.16E-25   |
| CISD1   | 218597_s_at | 11.35 | 1.84E-27   |
| MRPS16  | 218046_s_at | 11.35 | 5.49E-29   |
| HEXB    | 201944_at   | 11.34 | 5.67E-20   |
| PSEN1   | 203460_s_at | 11.34 | 2.32E-21   |
| SLC38A1 | 224579_at   | 11.34 | 3.26E-17   |
| RAB32   | 204214_s_at | 11.33 | 1.36E-22   |
| IRF9    | 203882_at   | 11.33 | 7.83E-27   |
| MT1H    | 206461_x_at | 11.31 | 8.65E-13   |
| AVEN    | 219366_at   | 11.29 | 1.82E-20   |
| SKIV2L2 | 212896_at   | 11.28 | 1.71E-31   |
| RUVBL2  | 201459_at   | 11.26 | 8.46E-27   |
| ALG9    | 219374_s_at | 11.26 | 2.77E-42   |
| ATL3    | 224893_at   | 11.25 | 1.62E-18   |



|              |              |       |          |
|--------------|--------------|-------|----------|
| MORC4        | 219038_at    | 11.25 | 7.96E-26 |
| GLO1         | 200681_at    | 11.25 | 5.91E-22 |
| HSPB7        | 218934_s_at  | 11.24 | 7.10E-40 |
| NFATC3       | 210555_s_at  | 11.23 | 1.67E-43 |
| RYK          | 216976_s_at  | 11.23 | 1.44E-35 |
| NMD3         | 218036_x_at  | 11.22 | 2.01E-39 |
| MOB1A        | 201298_s_at  | 11.22 | 5.73E-21 |
| UBQLN1       | 222990_at    | 11.20 | 1.91E-19 |
| SLC25A39     | 223649_s_at  | 11.19 | 9.92E-35 |
| CNOT11       | 224695_at    | 11.18 | 2.24E-38 |
| SLC25A32     | 221020_s_at  | 11.18 | 3.62E-22 |
| FAM21A       | 212370_x_at  | 11.17 | 7.82E-26 |
| NSMCE4A      | 211376_s_at  | 11.17 | 3.38E-31 |
| LOC100996253 | 200610_s_at  | 11.17 | 9.26E-26 |
| BCLAF1       | 201084_s_at  | 11.16 | 4.56E-18 |
| C10orf99     | 224373_s_at  | 11.16 | 2.86E-15 |
| USP11        | 208723_at    | 11.16 | 2.50E-21 |
| DYNC1I2      | 211684_s_at  | 11.15 | 2.23E-20 |
| EPHX1        | 202017_at    | 11.15 | 1.42E-24 |
| LUZP6        | 224656_s_at  | 11.15 | 2.44E-24 |
| RPL10        | 200725_x_at  | 11.14 | 1.41E-20 |
| CDKN1A       | 202284_s_at  | 11.13 | 1.67E-16 |
| RDH11        | 217775_s_at  | 11.12 | 7.00E-34 |
| NME4         | 212739_s_at  | 11.11 | 1.45E-29 |
| EMG1         | 209233_at    | 11.11 | 2.47E-23 |
| WDR83OS      | 217780_at    | 11.10 | 5.76E-27 |
| TMEM183A     | 212165_at    | 11.10 | 2.04E-32 |
| PTDSS1       | 201433_s_at  | 11.09 | 3.26E-21 |
| LASP1        | 200618_at    | 11.09 | 7.48E-22 |
| FKBP11       | 219118_at    | 11.08 | 1.89E-16 |
| CBS          | 212816_s_at  | 11.08 | 2.15E-32 |
| LOC100996732 | 228158_at    | 11.08 | 1.56E-24 |
| NEK6         | 223158_s_at  | 11.08 | 6.60E-25 |
| HMG20B       | 210719_s_at  | 11.08 | 4.91E-23 |
| SMARCC1      | 201075_s_at  | 11.07 | 4.47E-40 |
| PSMD13       | 201232_s_at  | 11.07 | 1.35E-23 |
| DCAF13       | 225676_s_at  | 11.06 | 1.07E-21 |
| CNPY3        | 1552977_a_at | 11.05 | 1.19E-36 |
| DGCR6        | 208024_s_at  | 11.04 | 1.89E-26 |
| SRPR         | 200918_s_at  | 11.03 | 1.84E-23 |
| ATP6VOC      | 200954_at    | 11.03 | 2.15E-32 |

|              |             |       |            |
|--------------|-------------|-------|------------|
| PHACTR2      | 204048_s_at | 11.03 | 7.60E-16   |
| CS           | 208660_at   | 11.03 | 2.03E-31   |
| PPIE         | 210502_s_at | 11.03 | 1.70E-24   |
| NDUFA12      | 223244_s_at | 11.02 | 5.58E-17   |
| CCT7         | 200812_at   | 11.02 | 1.24E-24   |
| EIF2B1       | 201632_at   | 11.00 | 3.55E-24   |
| HNRNPH3      | 210588_x_at | 11.00 | 4.34E-22   |
| NDUFC1       | 203478_at   | 11.00 | 1.02E-18   |
| VAMP5        | 204929_s_at | 11.00 | 5.00E-22   |
| CYBRD1       | 217889_s_at | 10.99 | 5.49E-23   |
| SRSF4        | 201696_at   | 10.99 | 5.86E-24   |
| MORN2        | 226790_at   | 10.99 | 3.00E-38   |
| FZD8         | 224325_at   | 10.98 | 7.51E-23   |
| S100A10      | 200872_at   | 10.98 | 6.17E-17   |
| STOML2       | 215416_s_at | 10.97 | 2.94E-20   |
| SNAI2        | 213139_at   | 10.97 | 5.33E-16   |
| SCRN1        | 201462_at   | 10.97 | 3.57E-20   |
| PET100       | 226006_at   | 10.97 | 1.09E-26   |
| MED1         | 225456_at   | 10.96 | 5.13E-37   |
| PCOLCE2      | 219295_s_at | 10.96 | 7.13E-19   |
| KDSR         | 202419_at   | 10.95 | 1.15E-26   |
| NDUFS7       | 211752_s_at | 10.95 | 5.50E-27   |
| BCL2L13      | 217955_at   | 10.95 | 3.32E-18   |
| FXR1         | 201637_s_at | 10.94 | 1.76E-25   |
| DNAJC9       | 213088_s_at | 10.94 | 2.56E-25   |
| ALDH7A1      | 208950_s_at | 10.94 | 4.77E-21   |
| KIRREL       | 225303_at   | 10.94 | 3.66E-22   |
| KCTD5        | 218474_s_at | 10.94 | 1.14E-34   |
| MYL6         | 212082_s_at | 10.92 | 7.81E-20   |
| C11orf87     | 236532_at   | 10.92 | < 2.90E-44 |
| ZHX1         | 223214_s_at | 10.90 | 3.64E-24   |
| SPARC        | 200665_s_at | 10.90 | 1.32E-12   |
| HECTD1       | 224481_s_at | 10.89 | 5.61E-23   |
| RPS15        | 200819_s_at | 10.89 | 5.13E-19   |
| LOC100131262 | 1558152_at  | 10.88 | 6.38E-39   |
| PTOV1        | 212032_s_at | 10.88 | 5.71E-22   |
| NOL7         | 202882_x_at | 10.88 | 1.57E-21   |
| CAPG         | 201850_at   | 10.87 | 1.09E-14   |
| LPAR1        | 204037_at   | 10.87 | 3.27E-17   |
| EGFR         | 201983_s_at | 10.87 | 5.18E-26   |
| CD99L2       | 223041_at   | 10.86 | 4.97E-37   |

|              |             |       |            |
|--------------|-------------|-------|------------|
| COX14        | 225772_s_at | 10.86 | 3.60E-30   |
| SQRDL        | 217995_at   | 10.85 | 2.84E-14   |
| NFIX         | 227400_at   | 10.85 | < 2.90E-44 |
| SLC39A14     | 212110_at   | 10.85 | 2.12E-14   |
| TRMT5        | 221952_x_at | 10.84 | 1.71E-24   |
| UBE3C        | 201817_at   | 10.84 | 1.55E-19   |
| MID1IP1      | 218251_at   | 10.84 | 2.90E-44   |
| MRPL34       | 221692_s_at | 10.83 | 1.84E-30   |
| SSRP1        | 200957_s_at | 10.83 | 4.71E-30   |
| LACTB        | 1552485_at  | 10.82 | 1.58E-33   |
| RSRC2        | 202302_s_at | 10.81 | 5.96E-21   |
| ERCC1        | 203719_at   | 10.80 | 2.75E-26   |
| DKK3         | 202196_s_at | 10.80 | 1.02E-18   |
| BTN3A2       | 209846_s_at | 10.79 | 4.10E-22   |
| HAX1         | 201145_at   | 10.79 | 7.92E-29   |
| LACTB2       | 222714_s_at | 10.79 | 3.80E-23   |
| MAGED2       | 208682_s_at | 10.78 | 2.57E-20   |
| PSME3        | 200987_x_at | 10.78 | 5.46E-30   |
| LOC100996792 | 215498_s_at | 10.78 | 7.06E-22   |
| CRELD2       | 218358_at   | 10.78 | 2.71E-25   |
| NREP         | 201310_s_at | 10.77 | 4.15E-20   |
| GNL3         | 217850_at   | 10.77 | 4.30E-26   |
| SGCE         | 204688_at   | 10.77 | 1.50E-15   |
| MCMBP        | 222464_s_at | 10.77 | 5.60E-24   |
| PLOD3        | 202185_at   | 10.76 | 2.44E-26   |
| EGLN1        | 223046_at   | 10.76 | 1.44E-17   |
| RBMS2        | 225776_at   | 10.76 | 2.91E-28   |
| ALG5         | 218203_at   | 10.76 | 4.51E-19   |
| TMEM251      | 213246_at   | 10.75 | 2.16E-22   |
| COX5B        | 202343_x_at | 10.73 | 1.39E-23   |
| LOC101060567 | 202658_at   | 10.73 | 3.02E-24   |
| DECR1        | 202447_at   | 10.73 | 6.15E-23   |
| GCNT1        | 239761_at   | 10.72 | 4.72E-34   |
| TNFRSF19     | 227812_at   | 10.72 | 2.56E-13   |
| FAF1         | 224217_s_at | 10.71 | 1.13E-21   |
| RPS12        | 213377_x_at | 10.69 | 3.13E-22   |
| C18orf32     | 224957_at   | 10.68 | 5.66E-18   |
| HSD17B4      | 201413_at   | 10.67 | 4.66E-21   |
| ST6GALNAC4   | 220937_s_at | 10.67 | 1.90E-40   |
| EPG5         | 227638_at   | 10.66 | 4.25E-30   |
| HPRT1        | 202854_at   | 10.66 | 2.60E-20   |

|          |             |       |            |
|----------|-------------|-------|------------|
| MYBL1    | 213906_at   | 10.66 | 9.58E-26   |
| GTF2H1   | 202453_s_at | 10.66 | 9.68E-41   |
| ANTXR2   | 225524_at   | 10.65 | 4.14E-19   |
| TXNL4A   | 202836_s_at | 10.65 | 8.30E-21   |
| RBM25    | 212030_at   | 10.65 | 1.47E-22   |
| SMOC1    | 222783_s_at | 10.65 | < 2.90E-44 |
| PIK3C2A  | 226094_at   | 10.64 | < 2.90E-44 |
| PTPN14   | 244533_at   | 10.63 | 9.43E-26   |
| IFRD2    | 209100_at   | 10.63 | 2.07E-31   |
| SKI      | 229265_at   | 10.63 | 3.28E-25   |
| TMEM208  | 221597_s_at | 10.62 | 1.36E-25   |
| EEF1E1   | 204905_s_at | 10.61 | 1.32E-15   |
| SLC25A37 | 222528_s_at | 10.61 | 7.58E-41   |
| FARP1    | 201911_s_at | 10.61 | 6.84E-19   |
| SASH1    | 213236_at   | 10.60 | 1.82E-33   |
| FAM120A  | 200774_at   | 10.59 | 6.65E-19   |
| POLR3K   | 218866_s_at | 10.59 | 3.87E-40   |
| SOCS5    | 209647_s_at | 10.58 | 2.47E-22   |
| BRD7     | 221776_s_at | 10.58 | 5.04E-28   |
| CAST     | 208908_s_at | 10.57 | 6.72E-27   |
| BFAR     | 218056_at   | 10.57 | 4.38E-32   |
| NIPA2    | 212129_at   | 10.56 | 1.20E-22   |
| PPIF     | 201490_s_at | 10.56 | < 2.90E-44 |
| HAS1     | 207316_at   | 10.56 | 3.60E-17   |
| CAV2     | 203323_at   | 10.55 | 7.40E-13   |
| MFSD1    | 218109_s_at | 10.55 | 3.02E-15   |
| PIGF     | 205078_at   | 10.55 | 6.90E-26   |
| MRPS9    | 226749_at   | 10.54 | 8.62E-23   |
| RAB31    | 217763_s_at | 10.53 | 5.08E-14   |
| MPZL1    | 210087_s_at | 10.53 | 1.49E-29   |
| PNPLA8   | 223309_x_at | 10.52 | 6.40E-26   |
| PLEKHB2  | 201410_at   | 10.52 | 1.72E-24   |
| PREPL    | 212216_at   | 10.52 | 1.00E-30   |
| SLC35E1  | 222263_at   | 10.51 | < 2.90E-44 |
| SPIN1    | 222431_at   | 10.50 | 1.42E-19   |
| ROCK2    | 202762_at   | 10.50 | 5.63E-16   |
| HERPUD1  | 217168_s_at | 10.49 | 1.29E-18   |
| DNAJC10  | 221781_s_at | 10.49 | 1.13E-30   |
| UAP1L1   | 214755_at   | 10.48 | 0          |
| IDH3B    | 210418_s_at | 10.46 | 5.59E-22   |
| FAM57A   | 218898_at   | 10.46 | 4.06E-32   |

|              |             |       |            |
|--------------|-------------|-------|------------|
| COPS3        | 202078_at   | 10.46 | 1.71E-26   |
| TM7SF3       | 222477_s_at | 10.45 | 1.81E-20   |
| LOC100509484 | 209122_at   | 10.45 | 3.79E-12   |
| LINC00116    | 228614_at   | 10.45 | 1.39E-40   |
| LRR1         | 235113_at   | 10.44 | 4.81E-34   |
| NCOA4        | 210774_s_at | 10.44 | 1.61E-16   |
| MICU1        | 216903_s_at | 10.43 | 7.99E-28   |
| SH3BGRL      | 201311_s_at | 10.43 | 1.08E-28   |
| ATP6V1A      | 201971_s_at | 10.43 | < 2.90E-44 |
| COPS4        | 218042_at   | 10.43 | 1.99E-18   |
| DDX41        | 217840_at   | 10.43 | 3.51E-19   |
| RPS8         | 200858_s_at | 10.42 | 7.21E-20   |
| WTAP         | 210285_x_at | 10.42 | 1.23E-36   |
| MED29        | 225708_at   | 10.41 | 1.30E-31   |
| AGPS         | 225113_at   | 10.41 | 5.46E-23   |
| GLT8D1       | 218147_s_at | 10.40 | 3.98E-23   |
| NETO2        | 218888_s_at | 10.40 | 5.78E-21   |
| RPL7L1       | 224738_x_at | 10.40 | 3.09E-25   |
| KDM5B        | 201549_x_at | 10.39 | 1.05E-24   |
| C11orf24     | 52164_at    | 10.39 | 3.39E-19   |
| PPP1R8       | 207830_s_at | 10.39 | 1.12E-30   |
| ZNF654       | 219239_s_at | 10.38 | 8.11E-43   |
| IMP3         | 221688_s_at | 10.37 | 5.57E-40   |
| RABGGTB      | 209180_at   | 10.37 | 1.02E-18   |
| STK17A       | 202695_s_at | 10.37 | 1.37E-38   |
| PRSS23       | 202458_at   | 10.36 | 8.63E-13   |
| SLC39A9      | 222445_at   | 10.36 | 4.43E-26   |
| YES1         | 202932_at   | 10.36 | 3.06E-18   |
| CHCHD7       | 222701_s_at | 10.36 | 7.37E-19   |
| HMG1         | 200943_at   | 10.36 | 4.71E-18   |
| C7orf55      | 226781_at   | 10.35 | 3.12E-27   |
| EIF2AK1      | 217736_s_at | 10.34 | 9.87E-20   |
| SNX17        | 200991_s_at | 10.34 | 3.04E-24   |
| TCEAL8       | 224819_at   | 10.34 | 1.93E-18   |
| RIOK3        | 202129_s_at | 10.32 | 4.64E-41   |
| IMMT         | 200955_at   | 10.32 | 5.46E-26   |
| LOXL3        | 228253_at   | 10.32 | 7.22E-32   |
| LAMB2        | 216264_s_at | 10.31 | 7.32E-21   |
| EIF2B2       | 202461_at   | 10.31 | 8.19E-26   |
| MRPS17       | 218982_s_at | 10.31 | 3.56E-22   |
| ENY2         | 218482_at   | 10.31 | 2.61E-28   |

|           |             |       |            |
|-----------|-------------|-------|------------|
| SCFD2     | 226923_at   | 10.30 | 2.24E-32   |
| TST       | 209605_at   | 10.30 | 5.19E-21   |
| CSNK1G3   | 220768_s_at | 10.29 | 2.46E-17   |
| ZWILCH    | 222606_at   | 10.29 | 1.39E-18   |
| TRIAP1    | 218403_at   | 10.29 | 7.52E-21   |
| NEU1      | 208926_at   | 10.29 | 4.64E-28   |
| KIAA1644  | 52837_at    | 10.28 | 1.54E-33   |
| NRAS      | 202647_s_at | 10.28 | 7.41E-19   |
| ABCC1     | 202805_s_at | 10.28 | < 2.90E-44 |
| BLOC1S1   | 202592_at   | 10.26 | 1.51E-31   |
| DNAJB1    | 200666_s_at | 10.26 | 7.94E-31   |
| UBE2J1    | 222435_s_at | 10.26 | 4.32E-19   |
| EBP       | 213787_s_at | 10.26 | 4.50E-29   |
| ZNF664    | 224593_at   | 10.25 | 2.59E-18   |
| FYN       | 216033_s_at | 10.25 | 1.15E-27   |
| BICD2     | 212702_s_at | 10.24 | 3.40E-26   |
| SPATA20   | 218164_at   | 10.24 | 2.18E-18   |
| PHLDA2    | 209803_s_at | 10.24 | 6.71E-10   |
| PPP2R1A   | 200695_at   | 10.23 | 1.10E-27   |
| DLX2      | 207147_at   | 10.23 | < 2.90E-44 |
| RNASEH1   | 218497_s_at | 10.23 | 2.74E-18   |
| CD248     | 219025_at   | 10.22 | 4.05E-20   |
| PEA15     | 200787_s_at | 10.21 | 1.06E-25   |
| AURKA     | 204092_s_at | 10.21 | 1.43E-21   |
| MAPK14    | 202530_at   | 10.21 | 5.10E-21   |
| ARHGAP35  | 229394_s_at | 10.20 | 5.28E-21   |
| SPOCD1    | 235417_at   | 10.20 | 2.47E-29   |
| WIPI2     | 204710_s_at | 10.19 | 1.02E-21   |
| EMILIN1   | 204163_at   | 10.19 | 3.66E-15   |
| GNB5      | 207124_s_at | 10.19 | 5.27E-36   |
| MAEA      | 207922_s_at | 10.19 | 4.87E-21   |
| MAPK1IP1L | 212644_s_at | 10.19 | 2.02E-28   |
| PPP3CB    | 209817_at   | 10.18 | 1.38E-19   |
| THY1      | 208850_s_at | 10.17 | 1.25E-13   |
| ARPP19    | 221483_s_at | 10.17 | 3.82E-19   |
| FOXM1     | 202580_x_at | 10.16 | 5.55E-28   |
| MRPL44    | 222555_s_at | 10.16 | 1.39E-41   |
| HGS       | 210428_s_at | 10.15 | 2.63E-27   |
| AAED1     | 227534_at   | 10.15 | 1.55E-35   |
| NAPA      | 206491_s_at | 10.13 | 1.03E-28   |
| TNRC6A    | 234734_s_at | 10.13 | 2.13E-31   |

|                    |             |       |            |
|--------------------|-------------|-------|------------|
| MTFR1L             | 224280_s_at | 10.12 | 9.35E-28   |
| PDHB               | 208911_s_at | 10.11 | 5.22E-28   |
| MBTPS2             | 226760_at   | 10.11 | 4.41E-14   |
| MSH2               | 209421_at   | 10.10 | 5.00E-20   |
| CUL4A              | 201423_s_at | 10.09 | 1.69E-29   |
| CUL2               | 203079_s_at | 10.09 | 1.91E-24   |
| NDUFA8             | 218160_at   | 10.09 | 1.01E-22   |
| CCNG2              | 211559_s_at | 10.07 | < 2.90E-44 |
| MSMO1              | 209146_at   | 10.06 | 3.89E-14   |
| GMDS               | 204875_s_at | 10.06 | 1.68E-23   |
| MIR4647            | 224716_at   | 10.06 | 7.37E-28   |
| LEO1               | 235096_at   | 10.06 | 5.92E-26   |
| PRKCA              | 213093_at   | 10.04 | 5.09E-20   |
| ACSL1              | 207275_s_at | 10.03 | 5.36E-24   |
| EMP2               | 204975_at   | 10.03 | 1.79E-19   |
| TNFRSF12A          | 218368_s_at | 10.02 | 4.53E-14   |
| DHX30              | 204355_at   | 10.01 | 3.86E-23   |
| UBE2F              | 225787_at   | 10.01 | 1.09E-18   |
| PANX1              | 204715_at   | 10.01 | 1.20E-25   |
| OBSL1              | 212776_s_at | 10.01 | 7.15E-17   |
| DNASE1L1           | 203912_s_at | 10.01 | 1.49E-26   |
| PLCB4              | 203895_at   | 9.99  | 1.56E-23   |
| MVB12A             | 227864_s_at | 9.99  | 3.04E-26   |
| DHX29              | 212648_at   | 9.98  | 4.27E-20   |
| CYP51A1            | 216607_s_at | 9.98  | 2.82E-34   |
| ERCC6              | 232287_at   | 9.98  | 1.07E-41   |
| SSBP3              | 222482_at   | 9.98  | 1.09E-20   |
| RPL22L1            | 225541_at   | 9.97  | 2.20E-16   |
| FEZ2               | 202305_s_at | 9.97  | 2.61E-18   |
| CPSF6              | 202469_s_at | 9.97  | 8.32E-18   |
| TPD52L1            | 210372_s_at | 9.96  | < 2.90E-44 |
| CCNK               | 225824_at   | 9.96  | 5.07E-28   |
| ADPRM              | 220606_s_at | 9.96  | < 2.90E-44 |
| EHD4               | 209536_s_at | 9.95  | 3.86E-20   |
| TMEM242            | 222638_s_at | 9.95  | 4.48E-32   |
| LOC101060439       | 200833_s_at | 9.94  | 1.01E-18   |
| NFIC               | 226895_at   | 9.94  | 3.08E-15   |
| NAE1               | 202268_s_at | 9.94  | 1.39E-13   |
| OTTHUMG00000031646 | 216505_x_at | 9.94  | 6.91E-21   |
| NPDC1              | 218086_at   | 9.94  | 4.28E-24   |
| CYLD               | 221903_s_at | 9.92  | 6.96E-24   |

|              |              |      |            |
|--------------|--------------|------|------------|
| DHX36        | 223139_s_at  | 9.91 | 1.21E-21   |
| FBXO9        | 1566509_s_at | 9.91 | 1.31E-19   |
| SLC10A3      | 204928_s_at  | 9.91 | 2.25E-23   |
| UBE2Q1       | 217978_s_at  | 9.90 | 1.06E-21   |
| PROSC        | 209385_s_at  | 9.90 | 9.21E-20   |
| NUP62        | 207740_s_at  | 9.90 | < 2.90E-44 |
| NMT1         | 201158_at    | 9.90 | 7.99E-33   |
| KDM3A        | 212689_s_at  | 9.90 | 1.14E-22   |
| MZT2A        | 212995_x_at  | 9.90 | 9.89E-21   |
| TOR1A        | 202348_s_at  | 9.89 | 5.72E-32   |
| ZSCAN18      | 218312_s_at  | 9.89 | 1.62E-20   |
| MRPS11       | 211595_s_at  | 9.89 | 3.98E-34   |
| PRKD1        | 205880_at    | 9.87 | 2.58E-15   |
| BECN1        | 208946_s_at  | 9.87 | 8.49E-18   |
| MAP4K5       | 203553_s_at  | 9.86 | 2.22E-25   |
| SHOC2        | 202777_at    | 9.86 | 5.77E-19   |
| TTC19        | 217964_at    | 9.86 | 1.13E-18   |
| PTPRG        | 204944_at    | 9.85 | 8.13E-15   |
| RPS3         | 208692_at    | 9.85 | 7.74E-21   |
| LOC100505573 | 225567_at    | 9.84 | 1.31E-21   |
| MRPL10       | 224671_at    | 9.84 | 9.51E-25   |
| MCM3AP       | 212269_s_at  | 9.83 | 5.21E-20   |
| TNFAIP1      | 201207_at    | 9.82 | 6.75E-25   |
| POLR2J2      | 216242_x_at  | 9.82 | 2.98E-39   |
| CUTA         | 221488_s_at  | 9.82 | 8.02E-22   |
| KIF4A        | 218355_at    | 9.82 | 1.51E-23   |
| PMM1         | 203467_at    | 9.81 | 1.58E-29   |
| ACO1         | 207071_s_at  | 9.80 | 1.04E-27   |
| TMEM97       | 212281_s_at  | 9.80 | 2.34E-10   |
| ACOX1        | 209600_s_at  | 9.79 | 5.43E-28   |
| COL5A1       | 212488_at    | 9.79 | 4.91E-12   |
| SHFM1        | 202276_at    | 9.79 | 2.92E-26   |
| ABI1         | 209027_s_at  | 9.78 | 1.58E-19   |
| CALR         | 214315_x_at  | 9.78 | 1.40E-13   |
| RAB7A        | 211961_s_at  | 9.78 | 1.56E-21   |
| SNRPA1       | 216977_x_at  | 9.78 | 1.28E-28   |
| LOC100505633 | 239370_at    | 9.78 | 1.00E-29   |
| SLIT3        | 203813_s_at  | 9.78 | 2.52E-17   |
| POPDC3       | 219926_at    | 9.78 | < 2.90E-44 |
| ZBTB8OS      | 228970_at    | 9.77 | 3.41E-27   |
| IL11RA       | 204773_at    | 9.77 | 1.28E-28   |



|           |              |      |            |
|-----------|--------------|------|------------|
| ORMDL1    | 223187_s_at  | 9.77 | 4.64E-23   |
| HMGXB4    | 212596_s_at  | 9.77 | 6.29E-21   |
| RAP1GDS1  | 209444_at    | 9.77 | 1.83E-24   |
| AKTIP     | 223894_s_at  | 9.77 | 3.14E-32   |
| TRAPPC11  | 233558_s_at  | 9.76 | 1.22E-35   |
| SWAP70    | 209307_at    | 9.76 | 4.22E-20   |
| TRIM28    | 200990_at    | 9.76 | 2.59E-19   |
| FABP5     | 202345_s_at  | 9.76 | 9.23E-16   |
| SMIM4     | 229826_at    | 9.75 | 5.48E-39   |
| MYO1B     | 212365_at    | 9.75 | 5.34E-20   |
| MRPL39    | 218558_s_at  | 9.75 | 4.63E-21   |
| PRR11     | 228273_at    | 9.75 | 1.81E-12   |
| CRIP2     | 208978_at    | 9.74 | 1.99E-27   |
| TRAPPC3   | 203511_s_at  | 9.74 | 3.52E-20   |
| SMC3      | 209257_s_at  | 9.74 | 8.27E-34   |
| KTN1      | 214709_s_at  | 9.74 | 1.01E-17   |
| TMSB10    | 217733_s_at  | 9.74 | 4.30E-19   |
| ACOT1     | 202982_s_at  | 9.73 | 9.05E-25   |
| USO1      | 201831_s_at  | 9.73 | 1.72E-22   |
| PPDPF     | 233571_x_at  | 9.73 | 5.79E-21   |
| HPCAL1    | 205462_s_at  | 9.73 | < 2.90E-44 |
| SMARCA2   | 206544_x_at  | 9.72 | 3.01E-33   |
| PI4KB     | 210417_s_at  | 9.72 | 3.61E-34   |
| GLTP      | 226177_at    | 9.72 | 1.72E-28   |
| JDP2      | 226267_at    | 9.72 | 3.38E-41   |
| NCBP1     | 209520_s_at  | 9.72 | 1.53E-35   |
| MAN1B1    | 65884_at     | 9.71 | 1.04E-29   |
| ATP8B1    | 226302_at    | 9.71 | 2.46E-14   |
| CAPN7     | 203357_s_at  | 9.71 | 3.99E-39   |
| HIST1H2BK | 209806_at    | 9.71 | 1.67E-15   |
| ZC3HAV1   | 225634_at    | 9.71 | 1.01E-22   |
| PDCL3     | 219043_s_at  | 9.71 | 3.05E-23   |
| SHCBP1    | 219493_at    | 9.70 | 1.57E-25   |
| MAK16     | 211686_s_at  | 9.70 | 2.15E-31   |
| RC3H2     | 220202_s_at  | 9.68 | < 2.90E-44 |
| CKS1B     | 201897_s_at  | 9.68 | 3.86E-18   |
| ACADVL    | 200710_at    | 9.67 | 1.09E-22   |
| C1GALT1   | 226107_at    | 9.67 | 2.34E-28   |
| GTF2I     | 201065_s_at  | 9.66 | 1.45E-22   |
| DNAJC3    | 225284_at    | 9.66 | 5.34E-20   |
| SPIRE1    | 1554807_a_at | 9.66 | < 2.90E-44 |

|           |              |      |            |
|-----------|--------------|------|------------|
| HNRNPA3   | 206809_s_at  | 9.66 | 6.10E-27   |
| UTP6      | 218715_at    | 9.66 | 5.15E-27   |
| SCO1      | 223221_at    | 9.65 | 4.13E-31   |
| MMP24-AS1 | 49679_s_at   | 9.65 | < 2.90E-44 |
| CCNY      | 224651_at    | 9.64 | 3.37E-19   |
| SIPA1L1   | 202254_at    | 9.64 | 9.63E-39   |
| FDPS      | 201275_at    | 9.64 | 3.22E-22   |
| UQCRQ     | 201568_at    | 9.64 | 5.85E-22   |
| ECHS1     | 201135_at    | 9.63 | 6.79E-25   |
| DPP3      | 232510_s_at  | 9.63 | 1.44E-27   |
| C1orf86   | 229113_s_at  | 9.62 | 1.65E-30   |
| ACO2      | 200793_s_at  | 9.62 | 1.15E-19   |
| QARS      | 217846_at    | 9.62 | 3.47E-22   |
| LAMTOR1   | 223009_at    | 9.62 | 1.80E-32   |
| MTHFD1    | 202309_at    | 9.62 | 1.18E-28   |
| ZWINT     | 204026_s_at  | 9.61 | 3.30E-10   |
| UBE2N     | 201523_x_at  | 9.61 | 6.22E-36   |
| C1orf174  | 238010_at    | 9.60 | < 2.90E-44 |
| PSMD9     | 207805_s_at  | 9.60 | 1.00E-23   |
| BPTF      | 207186_s_at  | 9.60 | 3.43E-20   |
| TLDC1     | 221843_s_at  | 9.59 | 5.18E-32   |
| TSN       | 201515_s_at  | 9.59 | 3.66E-21   |
| AK2       | 208967_s_at  | 9.59 | 4.60E-21   |
| ULBP2     | 238542_at    | 9.58 | 1.49E-35   |
| TLN1      | 203254_s_at  | 9.57 | 1.75E-39   |
| PRKAG1    | 201805_at    | 9.57 | 1.70E-33   |
| FBLN5     | 203088_at    | 9.57 | 1.19E-20   |
| CORO2B    | 209789_at    | 9.56 | < 2.90E-44 |
| TMX2      | 201175_at    | 9.56 | 5.36E-29   |
| CKAP5     | 1555278_a_at | 9.54 | 5.70E-44   |
| RALA      | 214435_x_at  | 9.54 | 3.43E-18   |
| C12orf44  | 218214_at    | 9.54 | 3.68E-21   |
| GSKIP     | 223239_at    | 9.53 | 1.13E-13   |
| LAMTOR4   | 224890_s_at  | 9.53 | 1.45E-21   |
| ANP32A    | 201051_at    | 9.53 | 2.66E-20   |
| UBE2C     | 202954_at    | 9.53 | 4.67E-18   |
| BPGM      | 203502_at    | 9.53 | 2.92E-22   |
| SUCLG2    | 215772_x_at  | 9.52 | 7.68E-13   |
| GREM2     | 220794_at    | 9.52 | 2.46E-39   |
| SF3B2     | 200619_at    | 9.52 | 1.89E-28   |
| SRP68     | 224607_s_at  | 9.52 | 9.30E-26   |

|              |              |      |            |
|--------------|--------------|------|------------|
| IMPACT       | 222698_s_at  | 9.52 | 5.03E-28   |
| DEF8         | 219646_at    | 9.52 | 7.18E-26   |
| CNN2         | 201605_x_at  | 9.52 | 2.13E-24   |
| IAH1         | 225908_at    | 9.50 | 5.07E-25   |
| ACTB         | 200801_x_at  | 9.50 | 1.57E-18   |
| TPRG1L       | 224871_at    | 9.50 | 1.28E-23   |
| AKT1         | 207163_s_at  | 9.49 | 1.08E-32   |
| CDK6         | 224851_at    | 9.49 | 2.19E-17   |
| SEC14L1      | 202082_s_at  | 9.49 | 3.90E-19   |
| DOCK5        | 230263_s_at  | 9.48 | 1.01E-13   |
| LOC100289097 | 215160_x_at  | 9.48 | 4.17E-27   |
| SLC35A2      | 209326_at    | 9.47 | 3.68E-18   |
| COL1A2       | 202403_s_at  | 9.46 | 1.48E-15   |
| SNRPF        | 203832_at    | 9.46 | 2.47E-29   |
| DYNC1LI2     | 224614_at    | 9.46 | 8.73E-29   |
| CARHSP1      | 218384_at    | 9.45 | 2.07E-34   |
| NUP85        | 218014_at    | 9.45 | 2.52E-24   |
| LBH          | 221011_s_at  | 9.44 | 6.55E-17   |
| LIX1L        | 225793_at    | 9.44 | 6.24E-18   |
| CHST3        | 209834_at    | 9.44 | 6.83E-30   |
| TTF1         | 204772_s_at  | 9.43 | < 2.90E-44 |
| QKI          | 212263_at    | 9.43 | 4.84E-20   |
| GSN          | 200696_s_at  | 9.43 | 1.42E-15   |
| RIC8A        | 221647_s_at  | 9.42 | 6.43E-30   |
| MRPL22       | 218339_at    | 9.42 | 1.56E-28   |
| EML4         | 228674_s_at  | 9.41 | 2.37E-24   |
| CDC6         | 203968_s_at  | 9.41 | < 2.90E-44 |
| IFRD1        | 202147_s_at  | 9.41 | 1.10E-22   |
| TMEM120A     | 223482_at    | 9.41 | 7.59E-27   |
| PQBP1        | 214527_s_at  | 9.40 | 3.48E-25   |
| HPS5         | 204544_at    | 9.40 | 2.17E-26   |
| MRPL9        | 209609_s_at  | 9.40 | 2.10E-19   |
| IL6ST        | 211000_s_at  | 9.39 | 6.40E-17   |
| NDUFB6       | 203613_s_at  | 9.39 | 2.14E-19   |
| RBM12        | 212168_at    | 9.39 | 1.28E-25   |
| COPRS        | 225096_at    | 9.39 | 5.85E-29   |
| ALKBH3       | 226127_at    | 9.39 | 3.44E-37   |
| USP38        | 223289_s_at  | 9.38 | 5.55E-37   |
| C16orf13     | 1554466_a_at | 9.38 | 1.16E-40   |
| NTAN1        | 213061_s_at  | 9.37 | 2.40E-24   |
| BGN          | 201262_s_at  | 9.37 | < 2.90E-44 |

|              |              |      |            |
|--------------|--------------|------|------------|
| PNN          | 210183_x_at  | 9.37 | 8.22E-22   |
| MZT1         | 225578_at    | 9.36 | 4.61E-22   |
| GDF15        | 221577_x_at  | 9.36 | 1.52E-30   |
| LOC100996643 | 225520_at    | 9.36 | 8.10E-15   |
| PHF23        | 1555789_s_at | 9.36 | < 2.90E-44 |
| CYB561       | 209164_s_at  | 9.36 | 4.93E-18   |
| BMP2R2       | 209920_at    | 9.35 | 1.23E-39   |
| EPB41L4A-AS1 | 225698_at    | 9.35 | 7.43E-13   |
| BSDC1        | 218004_at    | 9.34 | 1.48E-23   |
| CAND1        | 207483_s_at  | 9.34 | 4.14E-22   |
| CBX1         | 201518_at    | 9.33 | 6.02E-20   |
| CCBE1        | 229641_at    | 9.33 | 1.28E-24   |
| RPL30        | 200062_s_at  | 9.32 | 3.62E-20   |
| BAG5         | 202985_s_at  | 9.32 | 1.01E-22   |
| KRT19        | 201650_at    | 9.32 | 1.05E-10   |
| BOP1         | 212563_at    | 9.32 | 2.86E-21   |
| MEA1         | 218061_at    | 9.31 | 1.50E-25   |
| SERTAD2      | 202657_s_at  | 9.30 | 2.39E-18   |
| MTA1         | 211783_s_at  | 9.30 | 2.67E-26   |
| MKI67IP      | 224714_at    | 9.29 | 4.95E-24   |
| NDUFV1       | 208714_at    | 9.28 | 9.08E-19   |
| HM13         | 224615_x_at  | 9.28 | 2.86E-26   |
| MCM6         | 201930_at    | 9.27 | 2.73E-18   |
| GGPS1        | 202322_s_at  | 9.27 | 1.35E-27   |
| PSMD5        | 203447_at    | 9.27 | 7.30E-24   |
| IMP4         | 212411_at    | 9.27 | 1.25E-23   |
| SLC52A2      | 222155_s_at  | 9.27 | 2.06E-21   |
| WLS          | 228950_s_at  | 9.26 | 1.75E-21   |
| LAP3         | 217933_s_at  | 9.23 | 1.86E-16   |
| DFNA5        | 203695_s_at  | 9.23 | 8.50E-22   |
| PPA1         | 217848_s_at  | 9.23 | 1.69E-15   |
| NUCB1        | 200646_s_at  | 9.22 | < 2.90E-44 |
| GSTK1        | 217751_at    | 9.22 | 1.71E-22   |
| RABL2A       | 219151_s_at  | 9.22 | 5.65E-30   |
| PEX13        | 205246_at    | 9.22 | 1.74E-39   |
| RMDN1        | 218549_s_at  | 9.21 | 1.88E-16   |
| TRAPPC12     | 203122_at    | 9.21 | 4.15E-21   |
| NDUFB7       | 202839_s_at  | 9.20 | 9.81E-23   |
| TSEN15       | 225399_at    | 9.20 | 9.54E-21   |
| COQ5         | 223114_at    | 9.20 | 6.90E-23   |
| GPD1L        | 212510_at    | 9.20 | 6.58E-22   |

|              |              |      |            |
|--------------|--------------|------|------------|
| MT1P3        | 216336_x_at  | 9.20 | 1.13E-15   |
| UBE2Z        | 222395_s_at  | 9.19 | 3.99E-21   |
| PRDX6        | 200844_s_at  | 9.19 | 1.31E-21   |
| MSL2         | 218733_at    | 9.19 | 2.84E-42   |
| PRKCSH       | 200707_at    | 9.19 | 7.79E-21   |
| MTPAP        | 218947_s_at  | 9.18 | 4.45E-37   |
| CIAPIN1      | 208968_s_at  | 9.18 | 2.41E-27   |
| NUDT21       | 202697_at    | 9.17 | 1.44E-24   |
| NAV3         | 1552658_a_at | 9.17 | < 2.90E-44 |
| CRYBB2       | 206777_s_at  | 9.17 | 4.07E-30   |
| CDK1         | 203214_x_at  | 9.17 | 1.80E-25   |
| LYPLAL1      | 226851_at    | 9.16 | 6.47E-11   |
| PCM1         | 202174_s_at  | 9.16 | 1.72E-17   |
| TMEM203      | 225052_at    | 9.15 | 2.38E-21   |
| GCSH/        | 213133_s_at  | 9.15 | 5.06E-20   |
| EXOSC9       | 205061_s_at  | 9.14 | 2.54E-28   |
| RPS11        | 200031_s_at  | 9.14 | 8.11E-18   |
| EIF4E        | 201435_s_at  | 9.14 | 2.93E-25   |
| MMS19        | 202167_s_at  | 9.14 | 7.10E-29   |
| PFDN6        | 222029_x_at  | 9.14 | 2.51E-29   |
| CLPP         | 202799_at    | 9.14 | 8.44E-28   |
| RCN1         | 201063_at    | 9.14 | 1.19E-23   |
| PQLC3        | 225579_at    | 9.13 | 2.14E-16   |
| ANK2         | 202920_at    | 9.13 | 1.41E-10   |
| CLMP         | 228082_at    | 9.12 | 7.01E-31   |
| HEATR1       | 218594_at    | 9.12 | 1.89E-18   |
| LMO7         | 242722_at    | 9.11 | 6.90E-17   |
| EIF3G        | 208887_at    | 9.11 | 3.73E-18   |
| CENPV        | 226611_s_at  | 9.11 | 1.32E-39   |
| CCNYL1       | 228810_at    | 9.10 | 1.04E-33   |
| RAB4A        | 203582_s_at  | 9.10 | 2.21E-32   |
| NDUFB8       | 201226_at    | 9.09 | 2.86E-23   |
| TBL2         | 212685_s_at  | 9.08 | 5.46E-28   |
| DANCR        | 224870_at    | 9.08 | 1.16E-19   |
| GOLGA3       | 202106_at    | 9.07 | 9.32E-22   |
| TSSC1        | 217968_at    | 9.07 | 1.93E-32   |
| KITLG        | 226534_at    | 9.06 | 8.01E-10   |
| RAD23A       | 201039_s_at  | 9.06 | 1.78E-20   |
| TIMM10       | 1555764_s_at | 9.06 | 1.22E-19   |
| LEPREL1      | 218717_s_at  | 9.06 | 2.35E-08   |
| LOC100129034 | 225214_at    | 9.05 | 9.07E-29   |

|         |             |      |            |
|---------|-------------|------|------------|
| TMCO1   | 208716_s_at | 9.05 | 2.98E-16   |
| PRRC2C  | 211944_at   | 9.04 | 1.42E-23   |
| HEATR2  | 218460_at   | 9.04 | 9.47E-25   |
| PRPF18  | 221547_at   | 9.03 | 1.54E-23   |
| TIMM44  | 203093_s_at | 9.03 | 9.15E-36   |
| ERO1L   | 225750_at   | 9.03 | 3.51E-18   |
| ALS2    | 226291_at   | 9.02 | 4.21E-38   |
| SORBS2  | 204288_s_at | 9.02 | 1.01E-21   |
| GNAQ    | 224863_at   | 9.01 | < 2.90E-44 |
| MYH9    | 211926_s_at | 9.01 | 2.58E-19   |
| ANAPC16 | 224665_at   | 9.01 | 2.49E-24   |
| SGPP1   | 221268_s_at | 9.00 | < 2.90E-44 |
| GRINA   | 212090_at   | 9.00 | 3.24E-43   |
| COMMD10 | 218439_s_at | 8.99 | 1.96E-31   |
| MARGPRF | 227727_at   | 8.99 | 7.74E-17   |
| SPHK1   | 219257_s_at | 8.99 | 4.47E-13   |
| PPP1R3B | 222662_at   | 8.99 | 6.74E-20   |
| VAPA    | 208780_x_at | 8.99 | 2.54E-22   |
| FNDC3B  | 218618_s_at | 8.99 | 3.89E-17   |
| GTF2H4  | 203577_at   | 8.98 | 3.15E-36   |
| ACAN    | 207692_s_at | 8.98 | 3.28E-32   |
| GNPDA2  | 227022_at   | 8.98 | 6.02E-26   |
| MRPL21  | 225315_at   | 8.97 | 1.60E-27   |
| SC5D    | 211423_s_at | 8.97 | 6.13E-19   |
| SORD    | 201563_at   | 8.96 | 1.51E-21   |
| TMEM147 | 202475_at   | 8.96 | 1.84E-24   |
| ZSWIM8  | 212359_s_at | 8.95 | 1.99E-27   |
| NNT     | 202784_s_at | 8.95 | 2.64E-39   |
| TNFAIP8 | 210260_s_at | 8.94 | 1.06E-08   |
| DAP3    | 208822_s_at | 8.94 | 3.49E-24   |
| SRXN1   | 225252_at   | 8.94 | 8.58E-30   |
| TGFB111 | 209651_at   | 8.94 | 2.71E-12   |
| GSPT2   | 205541_s_at | 8.94 | 1.54E-19   |
| RYBP    | 201846_s_at | 8.93 | 3.01E-20   |
| LIMCH1  | 212327_at   | 8.93 | 5.96E-19   |
| TRIM25  | 224806_at   | 8.92 | 8.17E-24   |
| CDC27   | 217879_at   | 8.92 | 2.30E-23   |
| VPS26A  | 201807_at   | 8.92 | 2.21E-12   |
| WWP1    | 212638_s_at | 8.92 | 4.97E-22   |
| UROD    | 208971_at   | 8.91 | 4.49E-32   |
| EXOSC1  | 222609_s_at | 8.91 | 4.46E-27   |

|           |              |      |          |
|-----------|--------------|------|----------|
| PTMA      | 200773_x_at  | 8.90 | 2.03E-23 |
| XPOT      | 227117_at    | 8.90 | 4.17E-22 |
| RAB6A     | 201047_x_at  | 8.89 | 4.83E-26 |
| POP5      | 204839_at    | 8.89 | 4.26E-29 |
| SPTLC1    | 202277_at    | 8.88 | 1.25E-13 |
| NDUFV3    | 226616_s_at  | 8.88 | 1.82E-27 |
| ATP6V1E1  | 208678_at    | 8.88 | 3.69E-25 |
| LTBR      | 203005_at    | 8.88 | 1.35E-27 |
| ZBED1     | 1554821_a_at | 8.88 | 1.05E-27 |
| ANKRD27   | 221522_at    | 8.88 | 2.33E-18 |
| SZRD1     | 212005_at    | 8.87 | 3.46E-29 |
| ISLR      | 207191_s_at  | 8.87 | 1.80E-12 |
| GOLT1B    | 218193_s_at  | 8.87 | 3.36E-12 |
| DNAJB14   | 222850_s_at  | 8.87 | 1.38E-21 |
| MPG       | 203686_at    | 8.87 | 4.15E-34 |
| NR2C1     | 204791_at    | 8.87 | 1.74E-24 |
| IDI1      | 208881_x_at  | 8.86 | 8.57E-20 |
| TMEM55B   | 225287_s_at  | 8.86 | 3.61E-25 |
| CYC1      | 201066_at    | 8.85 | 1.04E-17 |
| UBA52     | 221700_s_at  | 8.85 | 1.41E-20 |
| CHD1L     | 212539_at    | 8.84 | 9.80E-22 |
| CTTNBP2NL | 226000_at    | 8.83 | 3.41E-17 |
| MRPL35    | 218890_x_at  | 8.83 | 3.22E-29 |
| ZMPSTE24  | 202939_at    | 8.83 | 8.57E-17 |
| MCUR1     | 220094_s_at  | 8.83 | 2.06E-20 |
| SDC3      | 202898_at    | 8.82 | 3.56E-30 |
| ARMCX6    | 214749_s_at  | 8.81 | 3.10E-18 |
| SDF2L1    | 218681_s_at  | 8.81 | 1.51E-22 |
| DDX46     | 202462_s_at  | 8.81 | 6.22E-21 |
| NCLN      | 222206_s_at  | 8.80 | 1.93E-39 |
| STK25     | 201314_at    | 8.80 | 2.77E-29 |
| NFIL3     | 203574_at    | 8.80 | 2.68E-11 |
| KLHL7     | 223250_at    | 8.80 | 1.97E-15 |
| LDOC1     | 204454_at    | 8.79 | 1.42E-26 |
| GGCX      | 205351_at    | 8.79 | 1.20E-30 |
| ATP5D     | 213041_s_at  | 8.79 | 8.10E-24 |
| PAK2      | 208875_s_at  | 8.78 | 4.60E-24 |
| BIRC5     | 202094_at    | 8.77 | 4.38E-30 |
| STX12     | 212112_s_at  | 8.77 | 4.00E-18 |
| TPP1      | 200742_s_at  | 8.76 | 6.33E-14 |
| LONP1     | 209017_s_at  | 8.76 | 1.90E-22 |

|              |              |      |            |
|--------------|--------------|------|------------|
| ATG3         | 221492_s_at  | 8.74 | 1.75E-19   |
| BOLA3        | 227291_s_at  | 8.73 | 2.49E-16   |
| CDR2L        | 213230_at    | 8.73 | 1.02E-28   |
| MICALL1      | 55081_at     | 8.73 | 2.98E-22   |
| GOT2         | 200708_at    | 8.72 | 1.45E-21   |
| IKBKAP       | 202491_s_at  | 8.72 | 4.09E-23   |
| RFWD2        | 1552617_a_at | 8.72 | 3.75E-26   |
| PTEN         | 217492_s_at  | 8.72 | 2.12E-17   |
| OR7E37P      | 217499_x_at  | 8.72 | 5.90E-28   |
| PNP          | 201695_s_at  | 8.71 | 5.04E-18   |
| RGS10        | 204319_s_at  | 8.70 | 1.13E-18   |
| UBR5         | 208884_s_at  | 8.70 | 1.90E-29   |
| BET1         | 202710_at    | 8.68 | 9.03E-17   |
| GGNBP2       | 218079_s_at  | 8.68 | 2.20E-19   |
| POFUT2       | 209578_s_at  | 8.68 | 3.24E-29   |
| WISP2        | 205792_at    | 8.67 | 7.27E-18   |
| TMED4        | 224676_at    | 8.67 | 6.23E-19   |
| C1GALT1C1    | 219283_at    | 8.67 | 3.22E-20   |
| SDF2         | 203090_at    | 8.67 | 4.95E-27   |
| ANKHD1       | 208772_at    | 8.66 | 3.05E-20   |
| BEX1         | 218332_at    | 8.66 | 2.11E-07   |
| DMAP1        | 224163_s_at  | 8.66 | 1.87E-29   |
| SCAND1       | 218206_x_at  | 8.65 | 4.39E-18   |
| TMEM131      | 212507_at    | 8.65 | 4.89E-17   |
| NUSAP1       | 218039_at    | 8.65 | 5.14E-10   |
| C2orf68      | 238768_at    | 8.64 | 5.58E-27   |
| MCEE         | 226238_at    | 8.64 | 2.80E-25   |
| COMMD4       | 209132_s_at  | 8.62 | 1.15E-24   |
| PIGX         | 1563111_a_at | 8.62 | < 2.90E-44 |
| DDX21        | 208152_s_at  | 8.62 | 1.92E-19   |
| XG           | 1554062_at   | 8.61 | 1.80E-13   |
| LSM12        | 212532_s_at  | 8.60 | 7.34E-20   |
| MSL1         | 212708_at    | 8.60 | 8.45E-25   |
| FAM63B       | 222111_at    | 8.59 | 2.17E-16   |
| FAIM         | 220643_s_at  | 8.59 | 3.47E-16   |
| LOC101060353 | 205872_x_at  | 8.59 | 5.56E-30   |
| FBXO45       | 225099_at    | 8.59 | 2.47E-19   |
| HDLBP        | 225012_at    | 8.58 | 2.77E-20   |
| FLOT1        | 208749_x_at  | 8.58 | 1.90E-21   |
| SLC35E2      | 217122_s_at  | 8.58 | 3.09E-18   |
| MT1E         | 212859_x_at  | 8.58 | 6.56E-15   |



|           |              |      |            |
|-----------|--------------|------|------------|
| CANT1     | 46323_at     | 8.57 | 1.91E-25   |
| MKKS      | 222530_s_at  | 8.57 | 4.29E-16   |
| LRPPRC    | 211615_s_at  | 8.57 | 1.15E-18   |
| TMEM237   | 1553956_at   | 8.57 | 9.81E-23   |
| GTF2F1    | 202356_s_at  | 8.57 | 5.70E-44   |
| SEL1L     | 202061_s_at  | 8.57 | 8.35E-16   |
| ADRM1     | 201281_at    | 8.56 | 1.06E-22   |
| MAPKAPK5  | 212871_at    | 8.56 | 1.26E-36   |
| DPY19L1   | 212792_at    | 8.56 | 6.26E-18   |
| LINC00968 | 243813_at    | 8.56 | 8.68E-34   |
| MAP3K7    | 211537_x_at  | 8.55 | < 2.90E-44 |
| SNRPE     | 203316_s_at  | 8.55 | 3.16E-19   |
| ARL6IP4   | 218216_x_at  | 8.55 | 1.97E-23   |
| FAM20A    | 226804_at    | 8.55 | 2.30E-14   |
| CTNNAL1   | 202468_s_at  | 8.55 | 3.07E-09   |
| PTN       | 211737_x_at  | 8.55 | 2.73E-12   |
| AZIN1     | 201772_at    | 8.54 | 7.67E-17   |
| TMEM245   | 223005_s_at  | 8.54 | < 2.90E-44 |
| MACF1     | 208633_s_at  | 8.53 | 3.56E-31   |
| PLXND1    | 212235_at    | 8.53 | 8.77E-19   |
| FLJ39739  | 1568609_s_at | 8.53 | 5.70E-18   |
| RNF13     | 201779_s_at  | 8.53 | 4.54E-21   |
| DDX19A    | 202578_s_at  | 8.52 | 1.15E-36   |
| CHURC1    | 226736_at    | 8.52 | 1.95E-07   |
| SEH1L     | 221931_s_at  | 8.51 | 4.92E-17   |
| RAB12     | 235059_at    | 8.51 | 1.67E-43   |
| OSER1     | 209020_at    | 8.51 | 2.34E-33   |
| DNTTIP1   | 234942_s_at  | 8.51 | 3.33E-32   |
| BLOC1S2   | 225049_at    | 8.51 | 1.01E-17   |
| SRP19     | 205335_s_at  | 8.51 | 5.16E-19   |
| COQ9      | 212228_s_at  | 8.50 | 8.02E-23   |
| MAN2B2    | 214703_s_at  | 8.50 | 5.31E-23   |
| RPL27A    | 203034_s_at  | 8.50 | 3.40E-19   |
| C9orf16   | 204480_s_at  | 8.50 | 3.40E-22   |
| NDN       | 209550_at    | 8.50 | 2.06E-20   |
| LPCAT4    | 40472_at     | 8.49 | 1.71E-29   |
| MCM5      | 216237_s_at  | 8.49 | 2.26E-23   |
| SMAD1     | 210993_s_at  | 8.49 | 3.79E-23   |
| PPP4R1    | 201594_s_at  | 8.49 | 4.99E-18   |
| BAZ1B     | 208445_s_at  | 8.49 | 2.20E-24   |
| BZW2      | 217809_at    | 8.49 | 1.53E-17   |

|          |              |      |            |
|----------|--------------|------|------------|
| ATF7     | 228829_at    | 8.48 | 6.05E-31   |
| C6orf62  | 213875_x_at  | 8.48 | 1.84E-35   |
| PICALM   | 215236_s_at  | 8.47 | < 2.90E-44 |
| PPAPDC1B | 226384_at    | 8.47 | 3.60E-31   |
| VEGFA    | 212171_x_at  | 8.47 | 7.28E-24   |
| C3orf14  | 219288_at    | 8.47 | 1.42E-16   |
| NUDT5    | 223100_s_at  | 8.47 | 4.05E-19   |
| RTF1     | 212301_at    | 8.46 | 2.86E-24   |
| ANKRD13C | 1554471_a_at | 8.46 | 1.02E-32   |
| STXBP1   | 202260_s_at  | 8.45 | 1.14E-19   |
| SPAG9    | 212470_at    | 8.45 | 1.30E-12   |
| AURKAPS1 | 202374_s_at  | 8.44 | 2.30E-29   |
| SMAP1    | 218137_s_at  | 8.44 | 4.76E-17   |
| PHKB     | 202738_s_at  | 8.44 | 7.90E-21   |
| C21orf59 | 218123_at    | 8.44 | 5.53E-23   |
| ATP6V1G1 | 208737_at    | 8.44 | 3.63E-21   |
| RB1CC1   | 202033_s_at  | 8.43 | 7.50E-21   |
| ORC3     | 210028_s_at  | 8.43 | 7.90E-24   |
| EEF1B2   | 200705_s_at  | 8.43 | 8.87E-17   |
| FGF2     | 204421_s_at  | 8.43 | 1.63E-36   |
| HOMER3   | 215489_x_at  | 8.43 | 4.38E-32   |
| UBE2V2   | 209096_at    | 8.43 | 1.48E-17   |
| ZC3H7A   | 226897_s_at  | 8.43 | 1.17E-39   |
| ASAP1    | 221039_s_at  | 8.43 | < 2.90E-44 |
| KCTD6    | 238077_at    | 8.42 | 9.55E-24   |
| SYNE1    | 232027_at    | 8.42 | 2.14E-41   |
| PCK2     | 202847_at    | 8.42 | 1.29E-20   |
| BSG      | 208677_s_at  | 8.41 | 3.50E-25   |
| PARK7    | 200006_at    | 8.41 | 4.70E-21   |
| EXOSC7   | 212627_s_at  | 8.41 | 2.15E-24   |
| MIR3658  | 209825_s_at  | 8.40 | 8.25E-29   |
| GTF2E2   | 202680_at    | 8.40 | 5.49E-26   |
| DUSP10   | 221563_at    | 8.40 | 5.48E-17   |
| FAM220A  | 224452_s_at  | 8.39 | 4.94E-20   |
| DCLK1    | 229800_at    | 8.39 | 2.60E-09   |
| HNRNPH2  | 201132_at    | 8.38 | 1.70E-16   |
| STEAP3   | 218424_s_at  | 8.36 | 3.43E-27   |
| BAD      | 1861_at      | 8.36 | 2.09E-31   |
| CTNNB1   | 1554411_at   | 8.36 | < 2.90E-44 |
| SLC2A6   | 220091_at    | 8.36 | 2.83E-39   |
| NPLOC4   | 217796_s_at  | 8.36 | 1.05E-29   |

|          |              |      |            |
|----------|--------------|------|------------|
| USP22    | 200083_at    | 8.35 | 6.69E-22   |
| CDC25B   | 201853_s_at  | 8.35 | 1.45E-21   |
| ILK      | 201234_at    | 8.35 | 6.46E-22   |
| CRAT     | 209522_s_at  | 8.35 | 5.60E-26   |
| MRPL51   | 224334_s_at  | 8.35 | 8.62E-35   |
| SLC7A11  | 217678_at    | 8.35 | 1.69E-34   |
| PRCC     | 208938_at    | 8.33 | 2.73E-39   |
| LMNB2    | 216952_s_at  | 8.33 | 4.63E-27   |
| ASCC2    | 215684_s_at  | 8.33 | 4.51E-33   |
| HUWE1    | 208598_s_at  | 8.33 | 3.17E-18   |
| SMC4     | 201663_s_at  | 8.32 | 2.86E-16   |
| C16orf72 | 1568954_s_at | 8.32 | 2.63E-37   |
| SMPD1    | 209420_s_at  | 8.31 | 1.73E-29   |
| TWIST2   | 229404_at    | 8.31 | 1.15E-20   |
| SEC22B   | 209207_s_at  | 8.30 | 3.85E-27   |
| OSTM1    | 235197_s_at  | 8.30 | 3.80E-29   |
| ARL16    | 234972_at    | 8.30 | 2.69E-38   |
| MRPL43   | 230027_s_at  | 8.30 | 1.92E-26   |
| CLDND1   | 208925_at    | 8.30 | 6.67E-24   |
| ABHD10   | 222697_s_at  | 8.30 | 3.49E-43   |
| ALG13    | 219015_s_at  | 8.29 | < 2.90E-44 |
| FH       | 214170_x_at  | 8.29 | 1.15E-20   |
| HADHB    | 201007_at    | 8.29 | 1.53E-19   |
| CASP2    | 226032_at    | 8.28 | 7.23E-23   |
| FAM229B  | 225812_at    | 8.28 | 3.95E-26   |
| MYEOV2   | 226845_s_at  | 8.28 | 1.83E-18   |
| CCDC71L  | 229521_at    | 8.28 | 1.15E-19   |
| TTK      | 204822_at    | 8.27 | 2.72E-21   |
| METTL22  | 218945_at    | 8.26 | 1.01E-28   |
| XRN2     | 223002_s_at  | 8.26 | 1.18E-23   |
| PIR      | 207469_s_at  | 8.25 | 1.58E-17   |
| L3HYPDH  | 227699_at    | 8.25 | 1.41E-24   |
| TRIP4    | 203732_at    | 8.25 | 1.17E-22   |
| GCN1L1   | 216232_s_at  | 8.24 | 5.15E-35   |
| GPATCH4  | 224632_at    | 8.24 | 4.24E-30   |
| MAP2K4   | 203266_s_at  | 8.24 | 5.35E-28   |
| ARIH1    | 201881_s_at  | 8.24 | 1.05E-26   |
| SRSF6    | 206108_s_at  | 8.24 | 6.68E-39   |
| PLXNA1   | 221538_s_at  | 8.24 | 1.21E-16   |
| DYM      | 223171_at    | 8.24 | 8.36E-21   |
| AP1G1    | 225771_at    | 8.23 | 1.25E-33   |

|              |             |      |            |
|--------------|-------------|------|------------|
| PEPD         | 202108_at   | 8.23 | 1.19E-28   |
| LOC101060433 | 212053_at   | 8.23 | 1.72E-24   |
| NIT2         | 218557_at   | 8.23 | 3.56E-22   |
| ARHGDI1A     | 213606_s_at | 8.22 | < 2.90E-44 |
| ANKRD11      | 234701_at   | 8.22 | 9.28E-33   |
| ZNF106       | 217781_s_at | 8.22 | 1.03E-19   |
| OXA1L        | 208717_at   | 8.21 | 3.38E-22   |
| SKAP2        | 216899_s_at | 8.21 | < 2.90E-44 |
| ARPC5L       | 220966_x_at | 8.21 | 2.02E-19   |
| UBLCP1       | 227413_at   | 8.20 | 1.00E-18   |
| SF1          | 208313_s_at | 8.20 | 2.90E-24   |
| SERPINB1     | 212268_at   | 8.20 | 2.73E-21   |
| SPCS3        | 218817_at   | 8.19 | 2.81E-15   |
| LOC101060315 | 227067_x_at | 8.19 | 3.39E-18   |
| TMEM14A      | 218477_at   | 8.19 | 7.99E-14   |
| RPLP1        | 200763_s_at | 8.19 | 3.35E-20   |
| EWSR1        | 210011_s_at | 8.19 | 7.54E-28   |
| FAM65A       | 218029_at   | 8.18 | 7.97E-29   |
| HMGA2        | 208025_s_at | 8.18 | 6.34E-13   |
| TNFRSF10D    | 227345_at   | 8.18 | 4.95E-22   |
| TAOK1        | 224769_at   | 8.18 | 1.42E-18   |
| CEP55        | 218542_at   | 8.18 | 1.41E-17   |
| DPH5         | 224060_s_at | 8.17 | 8.51E-25   |
| CAPZA1       | 208374_s_at | 8.17 | 1.45E-17   |
| CRYZL1       | 226151_x_at | 8.16 | 2.88E-23   |
| TPST1        | 204140_at   | 8.15 | 4.00E-27   |
| DHRS7B       | 220690_s_at | 8.15 | 4.19E-24   |
| NCAPG2       | 219588_s_at | 8.15 | 3.32E-36   |
| HEG1         | 213069_at   | 8.15 | 1.12E-16   |
| GJA1         | 201667_at   | 8.14 | 6.11E-11   |
| SNX12        | 224684_at   | 8.14 | 2.42E-22   |
| NDUFA6       | 202001_s_at | 8.14 | 3.12E-15   |
| POLR2F       | 209511_at   | 8.14 | 2.62E-24   |
| STAMBPL1     | 227606_s_at | 8.14 | 1.09E-41   |
| TUBGCP2      | 202477_s_at | 8.13 | 1.06E-26   |
| DUSP12       | 218576_s_at | 8.13 | 6.43E-27   |
| BLMH         | 202179_at   | 8.13 | 4.01E-24   |
| EDIL3        | 225275_at   | 8.12 | 2.46E-08   |
| LMAN2        | 200805_at   | 8.12 | 3.50E-25   |
| CREB1        | 204313_s_at | 8.12 | 2.53E-20   |
| NDUFAB1      | 202077_at   | 8.11 | 2.28E-20   |

|              |              |      |          |
|--------------|--------------|------|----------|
| NUFIP1       | 205135_s_at  | 8.11 | 1.13E-35 |
| ZDHHC7       | 218606_at    | 8.11 | 1.54E-22 |
| USP1         | 202413_s_at  | 8.11 | 5.18E-13 |
| MED8         | 213696_s_at  | 8.10 | 3.34E-21 |
| CHPF2        | 221799_at    | 8.10 | 4.92E-20 |
| PAFAH1B2     | 224777_s_at  | 8.10 | 1.15E-22 |
| CBX5         | 209715_at    | 8.09 | 2.65E-15 |
| LOC100506248 | 200772_x_at  | 8.09 | 4.81E-15 |
| PCGF5        | 229194_at    | 8.08 | 9.95E-17 |
| OXR1         | 223879_s_at  | 8.07 | 3.43E-40 |
| CDK2AP2      | 203252_at    | 8.07 | 2.98E-30 |
| SAV1         | 218276_s_at  | 8.06 | 6.67E-33 |
| FAM98B       | 1564637_a_at | 8.06 | 6.89E-28 |
| TRAK2        | 202124_s_at  | 8.06 | 3.39E-19 |
| GFM1         | 225161_at    | 8.06 | 3.57E-26 |
| ZNF512       | 225050_at    | 8.06 | 6.04E-20 |
| CLIC3        | 219529_at    | 8.06 | 1.38E-20 |
| COX4I1       | 202698_x_at  | 8.06 | 3.00E-20 |
| GGH          | 203560_at    | 8.05 | 6.10E-09 |
| TRPV2        | 219282_s_at  | 8.05 | 7.67E-23 |
| STRAP        | 200870_at    | 8.05 | 1.91E-17 |
| HAS3         | 223541_at    | 8.04 | 1.75E-34 |
| GMPPA        | 218070_s_at  | 8.03 | 6.55E-20 |
| ARL3         | 202641_at    | 8.03 | 1.12E-19 |
| ZMYM6        | 213698_at    | 8.03 | 3.41E-19 |
| WASF3        | 204042_at    | 8.03 | 3.33E-12 |
| TCEB1        | 202824_s_at  | 8.02 | 1.07E-17 |
| RABL3        | 226089_at    | 8.01 | 1.67E-43 |
| NRBP1        | 217765_at    | 8.01 | 1.37E-30 |
| LYPLA1       | 203007_x_at  | 8.00 | 6.57E-17 |
| ARMCX3       | 217858_s_at  | 8.00 | 1.85E-19 |
| CXorf40A     | 213315_x_at  | 8.00 | 4.98E-23 |
| CXorf40B     | 212961_x_at  | 8.00 | 4.91E-24 |
| SLC35G2      | 219569_s_at  | 7.99 | 1.55E-30 |
| DIABLO       | 219350_s_at  | 7.98 | 4.02E-25 |
| POLR2G       | 202306_at    | 7.97 | 2.04E-26 |
| NSDHL        | 209279_s_at  | 7.97 | 3.24E-38 |
| IMPAD1       | 224744_at    | 7.97 | 7.60E-19 |
| DCBLD1       | 226609_at    | 7.96 | 4.05E-12 |
| CTSL1        | 202087_s_at  | 7.96 | 6.02E-21 |
| NOL8         | 218244_at    | 7.96 | 6.24E-28 |

|          |              |      |            |
|----------|--------------|------|------------|
| SRPK2    | 1558254_s_at | 7.95 | 1.51E-27   |
| PACRGL   | 235260_s_at  | 7.94 | 4.30E-36   |
| SEC23IP  | 216392_s_at  | 7.94 | 7.18E-32   |
| SRSF5    | 212266_s_at  | 7.94 | 3.52E-16   |
| CBR1     | 209213_at    | 7.93 | 2.63E-29   |
| SUCLG1   | 217874_at    | 7.93 | 1.64E-22   |
| CRLF1    | 206315_at    | 7.93 | 5.61E-30   |
| RLIM     | 225416_at    | 7.93 | 1.08E-23   |
| SNRPA    | 201770_at    | 7.92 | 1.56E-21   |
| ZNF532   | 220617_s_at  | 7.92 | 2.62E-21   |
| STK24    | 208854_s_at  | 7.92 | 4.55E-27   |
| FAM114A2 | 222682_s_at  | 7.92 | 1.35E-21   |
| STK39    | 202786_at    | 7.92 | 5.90E-22   |
| CBWD1    | 226193_x_at  | 7.91 | 5.88E-20   |
| DAZAP1   | 218443_s_at  | 7.91 | 5.40E-30   |
| RAPGEF1  | 225738_at    | 7.91 | 3.33E-33   |
| SERP1    | 200971_s_at  | 7.90 | 6.60E-20   |
| SART1    | 200051_at    | 7.90 | 3.43E-21   |
| MTMR2    | 203211_s_at  | 7.89 | 6.89E-14   |
| ERI1     | 226416_at    | 7.89 | 5.55E-24   |
| RPL21    | 200012_x_at  | 7.89 | 1.10E-16   |
| SIAE     | 224391_s_at  | 7.89 | 6.30E-31   |
| DCXR     | 217973_at    | 7.89 | 1.01E-20   |
| MAN2A1   | 205105_at    | 7.88 | 4.17E-15   |
| NDUFC2   | 218101_s_at  | 7.88 | 7.68E-21   |
| FBN2     | 203184_at    | 7.88 | 1.24E-09   |
| ZDHHC9   | 222451_s_at  | 7.88 | 6.84E-22   |
| FGFR1    | 211535_s_at  | 7.88 | 9.30E-23   |
| CCNG1    | 208796_s_at  | 7.87 | 1.30E-11   |
| MPP6     | 205429_s_at  | 7.86 | 5.59E-22   |
| KLHDC10  | 209255_at    | 7.86 | 3.95E-23   |
| AGAP1    | 204066_s_at  | 7.85 | 1.35E-27   |
| MALAT1   | 223940_x_at  | 7.85 | 6.36E-11   |
| REPS1    | 224366_s_at  | 7.85 | 5.93E-23   |
| TMEM11   | 203437_at    | 7.84 | 4.41E-34   |
| NDUFB2   | 218200_s_at  | 7.84 | 7.03E-17   |
| CRNKL1   | 219913_s_at  | 7.84 | 6.67E-19   |
| LEPRE1   | 220750_s_at  | 7.83 | 6.29E-20   |
| SETD8    | 220200_s_at  | 7.83 | < 2.90E-44 |
| MALT1    | 208309_s_at  | 7.83 | 1.31E-27   |
| DLG5     | 201681_s_at  | 7.82 | 1.13E-16   |

|          |              |      |            |
|----------|--------------|------|------------|
| SUMO3    | 200740_s_at  | 7.82 | 2.95E-15   |
| PFDN4    | 205361_s_at  | 7.82 | 1.91E-13   |
| PSMF1    | 201052_s_at  | 7.82 | 5.32E-28   |
| ASMTL    | 36554_at     | 7.82 | 1.08E-26   |
| SAR1B    | 1554482_a_at | 7.79 | < 2.90E-44 |
| PRKCI    | 209678_s_at  | 7.79 | 1.77E-14   |
| RAB5B    | 201276_at    | 7.79 | 8.68E-39   |
| WRB      | 202749_at    | 7.79 | 1.94E-17   |
| KDM5D    | 206700_s_at  | 7.79 | 2.54E-30   |
| AHSA1    | 201491_at    | 7.78 | 4.69E-21   |
| SPA17    | 205406_s_at  | 7.77 | 5.86E-26   |
| HMGA1    | 206074_s_at  | 7.77 | 9.02E-20   |
| PCID2    | 225149_at    | 7.77 | 2.36E-28   |
| BGLAP    | 206956_at    | 7.77 | 1.04E-30   |
| C1orf131 | 226242_at    | 7.76 | 4.25E-21   |
| C1orf122 | 225480_at    | 7.76 | 1.89E-24   |
| TSHZ1    | 223283_s_at  | 7.76 | 3.32E-15   |
| ARFIP2   | 202109_at    | 7.75 | 2.37E-25   |
| ANKRD13A | 224810_s_at  | 7.75 | 3.18E-23   |
| JOSD1    | 201751_at    | 7.75 | 1.43E-24   |
| CHMP1B   | 218178_s_at  | 7.75 | 6.88E-35   |
| SREK1    | 212721_at    | 7.75 | 4.86E-12   |
| GPATCH8  | 212485_at    | 7.75 | 4.11E-23   |
| MT1G     | 204745_x_at  | 7.75 | 5.75E-11   |
| CCDC104  | 224968_at    | 7.74 | 3.05E-21   |
| SUPT20H  | 226330_s_at  | 7.74 | 1.99E-21   |
| SIAH2    | 209339_at    | 7.74 | 8.49E-37   |
| PYROXD1  | 213878_at    | 7.74 | 1.24E-17   |
| HLA-E    | 200905_x_at  | 7.73 | 9.46E-20   |
| U2SURP   | 212058_at    | 7.73 | 4.18E-16   |
| HARS2    | 209252_at    | 7.73 | 3.44E-29   |
| VEGFB    | 203683_s_at  | 7.72 | 4.46E-33   |
| LIN37    | 213526_s_at  | 7.72 | 1.79E-22   |
| NADSYN1  | 232946_s_at  | 7.72 | 2.31E-20   |
| FAM122A  | 226443_at    | 7.72 | 4.25E-27   |
| PSMD7    | 201705_at    | 7.72 | 1.64E-17   |
| BAG3     | 217911_s_at  | 7.71 | 7.20E-21   |
| RP9      | 227852_at    | 7.71 | 3.31E-23   |
| AKAP11   | 203156_at    | 7.71 | 1.95E-15   |
| ZFP36L2  | 201369_s_at  | 7.70 | 1.22E-13   |
| UBA6     | 218340_s_at  | 7.70 | 8.44E-39   |

|                    |             |      |            |
|--------------------|-------------|------|------------|
| ARF6               | 203311_s_at | 7.70 | 4.24E-40   |
| SNRPB2             | 202505_at   | 7.70 | 2.19E-27   |
| NPR2               | 204310_s_at | 7.70 | 9.90E-38   |
| H2BFS              | 208579_x_at | 7.69 | 3.44E-36   |
| COPG2              | 223457_at   | 7.69 | 4.05E-34   |
| NEDD4              | 213012_at   | 7.69 | 1.00E-21   |
| SF3B1              | 201071_x_at | 7.68 | 1.73E-19   |
| TPR                | 201730_s_at | 7.68 | 3.84E-15   |
| WIPF2              | 212051_at   | 7.68 | 8.83E-28   |
| MTIF3              | 223356_s_at | 7.68 | 1.19E-21   |
| MIB1               | 224726_at   | 7.68 | 7.50E-23   |
| DRG1               | 202810_at   | 7.67 | 5.83E-23   |
| BIRC6              | 224635_s_at | 7.67 | 5.79E-26   |
| RNF5               | 209111_at   | 7.67 | 2.91E-21   |
| FAM89B             | 32209_at    | 7.66 | 2.35E-28   |
| ILVBL              | 202993_at   | 7.66 | 2.16E-17   |
| MELK               | 204825_at   | 7.66 | 4.50E-11   |
| SNX6               | 217789_at   | 7.65 | 7.63E-21   |
| PSMB8              | 209040_s_at | 7.65 | 1.26E-17   |
| ASH1L              | 222667_s_at | 7.65 | 1.35E-16   |
| HGSNAT             | 218017_s_at | 7.65 | 7.87E-19   |
| AGPAT3             | 223182_s_at | 7.65 | 1.29E-13   |
| SNX8               | 223241_at   | 7.64 | 1.99E-27   |
| KIF3B              | 225205_at   | 7.64 | 4.71E-27   |
| DPP8               | 220939_s_at | 7.64 | 2.32E-22   |
| NUP93              | 202188_at   | 7.64 | 2.53E-27   |
| OTTHUMG00000163952 | 235696_at   | 7.64 | < 2.90E-44 |
| SEC61B             | 203133_at   | 7.63 | 1.50E-20   |
| CREB3              | 209432_s_at | 7.63 | 2.98E-20   |
| STX4               | 203530_s_at | 7.63 | 1.11E-24   |
| FAM103A1           | 225210_s_at | 7.63 | 2.75E-13   |
| WBP11              | 217821_s_at | 7.63 | 3.41E-33   |
| CERS5              | 224951_at   | 7.62 | 6.07E-23   |
| TMEM185A           | 227880_s_at | 7.62 | 7.52E-23   |
| C15orf40           | 1552310_at  | 7.62 | 1.66E-18   |
| NMRAL1             | 223206_s_at | 7.61 | 5.67E-18   |
| USP47              | 221518_s_at | 7.60 | 9.83E-28   |
| C1orf21            | 223125_s_at | 7.60 | 4.53E-15   |
| EIF1AY             | 204409_s_at | 7.60 | 2.16E-32   |
| G3BP1              | 201514_s_at | 7.60 | 2.61E-26   |
| PLK2               | 201939_at   | 7.59 | 1.06E-14   |



|          |             |      |            |
|----------|-------------|------|------------|
| MBOAT2   | 226726_at   | 7.59 | 8.86E-33   |
| TJP2     | 202085_at   | 7.59 | 5.86E-14   |
| SETD7    | 224928_at   | 7.59 | 3.47E-15   |
| ABCF1    | 200045_at   | 7.59 | 1.69E-20   |
| RPL23A   | 213084_x_at | 7.59 | 1.05E-17   |
| RNASET2  | 217983_s_at | 7.58 | 4.44E-14   |
| MED15    | 222175_s_at | 7.58 | 4.53E-26   |
| PCCB     | 212694_s_at | 7.58 | 9.42E-18   |
| ZMAT2    | 224782_at   | 7.56 | 4.57E-19   |
| SMARCA5  | 202303_x_at | 7.56 | 2.46E-24   |
| DLAT     | 212568_s_at | 7.56 | 2.10E-20   |
| TIMM21   | 223181_at   | 7.55 | 6.88E-21   |
| RBM42    | 205740_s_at | 7.55 | 6.64E-21   |
| EIF4B    | 211938_at   | 7.54 | 1.36E-17   |
| PRNP     | 215707_s_at | 7.54 | 1.86E-40   |
| NOA1     | 223157_at   | 7.53 | 8.89E-23   |
| STAT1    | 200887_s_at | 7.53 | 1.15E-10   |
| ATF7IP   | 218987_at   | 7.53 | 6.65E-25   |
| ALG8     | 203545_at   | 7.52 | 4.81E-24   |
| KLHL12   | 225068_at   | 7.52 | 4.86E-17   |
| LDB2     | 206481_s_at | 7.52 | 1.90E-15   |
| EPB41L2  | 201718_s_at | 7.51 | 2.31E-30   |
| BACE1    | 224335_s_at | 7.51 | < 2.90E-44 |
| BSCL2    | 208906_at   | 7.50 | 1.60E-23   |
| RALBP1   | 202845_s_at | 7.50 | 2.38E-26   |
| YLPM1    | 212787_at   | 7.50 | 6.37E-19   |
| SERBP1   | 209669_s_at | 7.50 | 3.74E-19   |
| MRPS27   | 212145_at   | 7.50 | 1.44E-25   |
| KCNE4    | 1552508_at  | 7.48 | 1.50E-31   |
| EIF4G2   | 200004_at   | 7.48 | 2.51E-19   |
| HOXC6    | 206858_s_at | 7.48 | 6.60E-12   |
| WARS2    | 222734_at   | 7.47 | 4.18E-22   |
| ARHGAP17 | 218076_s_at | 7.47 | 7.52E-25   |
| WHSC1    | 209053_s_at | 7.47 | 3.94E-26   |
| AGA      | 216064_s_at | 7.47 | 2.66E-31   |
| UGDH     | 203343_at   | 7.47 | 7.58E-12   |
| PRKAG2   | 222582_at   | 7.47 | 1.77E-16   |
| KIF2A    | 203087_s_at | 7.47 | 1.85E-19   |
| ARNTL2   | 220658_s_at | 7.46 | 1.13E-35   |
| PLGRKT   | 218992_at   | 7.45 | 3.66E-22   |
| LPHN2    | 206953_s_at | 7.44 | 1.39E-15   |

|              |              |      |            |
|--------------|--------------|------|------------|
| APEH         | 201284_s_at  | 7.44 | 4.43E-18   |
| HMG20A       | 218152_at    | 7.44 | 6.53E-19   |
| LRP1         | 200785_s_at  | 7.44 | 9.83E-18   |
| BRK1         | 224575_at    | 7.44 | 1.75E-24   |
| FAM32A       | 201863_at    | 7.44 | 9.34E-24   |
| DEXI         | 203733_at    | 7.43 | 1.59E-28   |
| HNRNPR       | 208765_s_at  | 7.43 | 7.49E-20   |
| KLF4         | 221841_s_at  | 7.43 | 2.17E-07   |
| ICT1         | 204868_at    | 7.43 | 1.39E-25   |
| TEAD2        | 226408_at    | 7.43 | 4.31E-24   |
| IDUA         | 205059_s_at  | 7.42 | 7.81E-29   |
| DCTN4        | 218013_x_at  | 7.42 | 1.10E-39   |
| PPP3CC       | 207000_s_at  | 7.42 | 2.77E-36   |
| ZDHHC13      | 219296_at    | 7.42 | 4.59E-29   |
| METTL17      | 223528_s_at  | 7.42 | 4.44E-24   |
| PHTF1        | 210191_s_at  | 7.41 | 2.77E-34   |
| LOC100288142 | 201104_x_at  | 7.41 | 4.87E-26   |
| DDX5         | 200033_at    | 7.41 | 2.89E-18   |
| ZW10         | 204812_at    | 7.41 | 3.87E-29   |
| SEC16A       | 215696_s_at  | 7.41 | 1.66E-20   |
| FAM46A       | 221766_s_at  | 7.41 | 5.37E-15   |
| HIGD2A       | 209329_x_at  | 7.41 | 9.19E-27   |
| DIDO1        | 227335_at    | 7.41 | 3.18E-35   |
| MRP63        | 224535_s_at  | 7.40 | 2.30E-30   |
| DIAPH3       | 229097_at    | 7.40 | 3.67E-12   |
| SMARCA1      | 215294_s_at  | 7.40 | 2.11E-31   |
| DCPS         | 218774_at    | 7.40 | 7.44E-27   |
| UGGT1        | 222569_at    | 7.39 | 8.57E-40   |
| SH3KBP1      | 1554168_a_at | 7.39 | 1.97E-14   |
| SP1          | 224754_at    | 7.39 | 5.84E-20   |
| ME2          | 210154_at    | 7.38 | < 2.90E-44 |
| CNRIP1       | 226751_at    | 7.38 | 2.96E-17   |
| SRGAP1       | 227484_at    | 7.38 | 6.59E-22   |
| CWC15        | 223067_at    | 7.37 | 3.49E-18   |
| ALG6         | 219649_at    | 7.37 | 2.03E-17   |
| MLX          | 217909_s_at  | 7.36 | 2.77E-29   |
| POLR1C       | 207515_s_at  | 7.36 | 1.07E-36   |
| HNRNPA0      | 201054_at    | 7.36 | 2.37E-16   |
| COL6A3       | 201438_at    | 7.36 | 1.48E-21   |
| LOC654342    | 214110_s_at  | 7.36 | 3.83E-21   |
| LPIN1        | 212276_at    | 7.36 | 1.62E-21   |

|              |              |      |            |
|--------------|--------------|------|------------|
| SNHG17       | 65588_at     | 7.36 | 1.79E-21   |
| DSE          | 218854_at    | 7.35 | 5.37E-08   |
| HERPUD2      | 1552628_a_at | 7.35 | 4.24E-25   |
| TIPIN        | 219258_at    | 7.34 | 2.62E-21   |
| KIAA1737     | 225623_at    | 7.33 | 1.26E-23   |
| DEPDC1       | 232278_s_at  | 7.33 | 2.19E-43   |
| TSR3         | 213104_at    | 7.33 | 3.77E-25   |
| SLC30A1      | 212907_at    | 7.33 | 1.98E-12   |
| MINA         | 213189_at    | 7.32 | 1.53E-23   |
| CTD-2336O2.1 | 227092_at    | 7.32 | 4.95E-28   |
| MYO1C        | 225080_at    | 7.32 | 7.56E-28   |
| MET          | 203510_at    | 7.31 | 8.28E-11   |
| LINC00667    | 226235_at    | 7.31 | 3.77E-33   |
| EIF2S1       | 201144_s_at  | 7.31 | 2.26E-17   |
| ZMYM4        | 202050_s_at  | 7.31 | 8.24E-30   |
| PITHD1       | 223124_s_at  | 7.31 | 1.68E-20   |
| SLC6A8       | 202219_at    | 7.31 | 1.67E-12   |
| PDCD5        | 219275_at    | 7.30 | 4.20E-29   |
| EXOC1        | 222127_s_at  | 7.30 | 4.22E-19   |
| GSK3B        | 209945_s_at  | 7.30 | 1.16E-20   |
| EAPP         | 202623_at    | 7.30 | 9.05E-20   |
| MITD1        | 226329_s_at  | 7.30 | 1.86E-22   |
| UBE3A        | 211285_s_at  | 7.30 | 1.12E-21   |
| IDH2         | 210046_s_at  | 7.30 | 6.11E-17   |
| DHFR         | 202533_s_at  | 7.29 | < 2.90E-44 |
| PIK3CA       | 204369_at    | 7.29 | 3.20E-30   |
| FAH          | 202862_at    | 7.29 | 2.32E-21   |
| U2AF1        | 202858_at    | 7.29 | 6.76E-17   |
| TXNDC15      | 220495_s_at  | 7.29 | 2.97E-17   |
| SH2B3        | 203320_at    | 7.29 | 2.07E-21   |
| NCK1         | 204725_s_at  | 7.29 | 7.82E-32   |
| SNX14        | 225101_s_at  | 7.29 | 9.09E-19   |
| BLCAP        | 201032_at    | 7.29 | 3.96E-20   |
| TBC1D16      | 228488_at    | 7.28 | 1.10E-22   |
| FAM83D       | 225687_at    | 7.28 | 7.19E-14   |
| LY96         | 206584_at    | 7.28 | 3.19E-13   |
| TMEM206      | 222752_s_at  | 7.28 | 6.96E-24   |
| MNAT1        | 203565_s_at  | 7.28 | 9.30E-32   |
| DIXDC1       | 214724_at    | 7.27 | 5.34E-14   |
| JAGN1        | 223104_at    | 7.27 | 2.82E-24   |
| PTPN12       | 202006_at    | 7.26 | 6.06E-16   |

|          |             |      |          |
|----------|-------------|------|----------|
| ST3GAL1  | 225033_at   | 7.26 | 2.11E-24 |
| GBA      | 209093_s_at | 7.26 | 3.82E-29 |
| GTF3A    | 201338_x_at | 7.26 | 2.81E-18 |
| ERRFI1   | 224657_at   | 7.25 | 1.60E-11 |
| NDUFAF4  | 219006_at   | 7.24 | 4.50E-23 |
| SLC9A6   | 203909_at   | 7.24 | 5.06E-29 |
| AKAP12   | 227529_s_at | 7.24 | 8.04E-10 |
| NECAP1   | 209300_s_at | 7.24 | 5.62E-22 |
| SYAP1    | 225154_at   | 7.24 | 5.83E-24 |
| TIMM22   | 222841_s_at | 7.24 | 7.11E-41 |
| MAGT1    | 224899_s_at | 7.23 | 2.37E-13 |
| MDP1     | 228763_at   | 7.23 | 1.03E-17 |
| GEM      | 204472_at   | 7.22 | 1.39E-11 |
| EHD3     | 218935_at   | 7.22 | 9.52E-18 |
| MED16    | 43544_at    | 7.22 | 1.10E-13 |
| DCAF5    | 224703_at   | 7.22 | 4.23E-25 |
| VPS37B   | 221704_s_at | 7.22 | 1.16E-21 |
| ZDHHC6   | 218249_at   | 7.22 | 5.44E-22 |
| CCDC28A  | 209479_at   | 7.21 | 3.40E-20 |
| CDK16    | 207239_s_at | 7.21 | 2.35E-32 |
| CD58     | 205173_x_at | 7.20 | 3.62E-16 |
| RFC4     | 204023_at   | 7.20 | 1.50E-17 |
| GFM2     | 225392_at   | 7.20 | 5.97E-29 |
| C19orf43 | 223003_at   | 7.19 | 1.08E-22 |
| SNX4     | 205329_s_at | 7.19 | 7.67E-23 |
| MFSD10   | 209215_at   | 7.19 | 5.83E-21 |
| CYB5R4   | 219079_at   | 7.19 | 1.48E-36 |
| BNIP2    | 226280_at   | 7.19 | 6.78E-15 |
| PNPO     | 222653_at   | 7.19 | 4.24E-30 |
| UMPS     | 202706_s_at | 7.19 | 4.80E-22 |
| SUPT16H  | 217815_at   | 7.19 | 9.68E-23 |
| STEAP1B  | 217553_at   | 7.18 | 1.37E-38 |
| NOTCH2   | 210756_s_at | 7.18 | 2.90E-44 |
| KMT2E    | 223189_x_at | 7.18 | 2.98E-15 |
| MYO1E    | 203072_at   | 7.17 | 1.68E-34 |
| FOXF2    | 206377_at   | 7.17 | 7.87E-21 |
| BAALC    | 222780_s_at | 7.17 | 1.06E-36 |
| APOPT1   | 225948_at   | 7.17 | 3.07E-37 |
| NENF     | 218407_x_at | 7.17 | 1.50E-27 |
| TUBA4A   | 212242_at   | 7.16 | 3.63E-18 |
| COA4     | 220647_s_at | 7.16 | 1.45E-25 |

|           |              |      |            |
|-----------|--------------|------|------------|
| PXN       | 201087_at    | 7.16 | 2.43E-29   |
| COL27A1   | 225288_at    | 7.16 | 9.83E-15   |
| DAPK3     | 203890_s_at  | 7.16 | 2.90E-44   |
| NDC80     | 204162_at    | 7.15 | 2.48E-11   |
| PGAM1     | 200886_s_at  | 7.15 | 2.97E-19   |
| XPC       | 209375_at    | 7.15 | 1.55E-24   |
| TRIM44    | 217759_at    | 7.15 | 1.70E-19   |
| GTF2B     | 208066_s_at  | 7.15 | 2.17E-20   |
| UROS      | 203031_s_at  | 7.14 | 1.99E-23   |
| LINC00094 | 203245_s_at  | 7.14 | 7.25E-20   |
| MSRB3     | 1554127_s_at | 7.13 | 1.55E-19   |
| EIF3J     | 208985_s_at  | 7.13 | 3.47E-15   |
| DUSP6     | 208893_s_at  | 7.13 | 4.62E-14   |
| IGF2BP2   | 218847_at    | 7.13 | 1.71E-12   |
| UTP18     | 203721_s_at  | 7.12 | 1.12E-15   |
| NOP16     | 214011_s_at  | 7.12 | 2.06E-21   |
| WDR46     | 209196_at    | 7.11 | 6.86E-23   |
| TWISTNB   | 226784_at    | 7.11 | 1.58E-30   |
| WDSUB1    | 226668_at    | 7.11 | 1.42E-17   |
| HADH      | 211569_s_at  | 7.11 | 2.50E-18   |
| UBAP2L    | 201378_s_at  | 7.11 | 7.68E-30   |
| UBXN7     | 217100_s_at  | 7.11 | 6.10E-33   |
| FUS       | 200959_at    | 7.11 | 6.33E-17   |
| YTHDF3    | 1564053_a_at | 7.11 | < 2.90E-44 |
| GOPC      | 227215_at    | 7.10 | 5.38E-16   |
| ACIN1     | 201715_s_at  | 7.10 | 3.09E-26   |
| HLA-C     | 211799_x_at  | 7.10 | 1.58E-16   |
| C12orf10  | 218220_at    | 7.10 | 2.00E-20   |
| ABHD17C   | 225436_at    | 7.10 | 3.96E-27   |
| YARS      | 212048_s_at  | 7.10 | 2.23E-23   |
| PRPF31    | 202407_s_at  | 7.10 | 4.40E-40   |
| ACAD8     | 221669_s_at  | 7.10 | 5.16E-35   |
| TGS1      | 238346_s_at  | 7.10 | 1.64E-17   |
| FOSL1     | 204420_at    | 7.10 | 1.66E-40   |
| PLA2G16   | 209581_at    | 7.09 | 2.17E-13   |
| KLHL21    | 203068_at    | 7.09 | 4.59E-24   |
| CFDP1     | 203166_at    | 7.09 | 4.44E-22   |
| PDPK1     | 224986_s_at  | 7.08 | 2.51E-20   |
| CYFIP1    | 208923_at    | 7.08 | 2.70E-18   |
| FZD6      | 203987_at    | 7.08 | 2.05E-13   |
| TANK      | 207616_s_at  | 7.08 | 1.97E-23   |

|           |              |      |            |
|-----------|--------------|------|------------|
| NPIPA1    | 204538_x_at  | 7.08 | 8.31E-20   |
| ABL2      | 231907_at    | 7.08 | 6.44E-35   |
| COMMD9    | 218072_at    | 7.07 | 2.11E-20   |
| RPL22     | 221726_at    | 7.07 | 1.45E-14   |
| CPPED1    | 222686_s_at  | 7.07 | 1.28E-38   |
| HTRA2     | 203089_s_at  | 7.07 | 2.00E-16   |
| BMP1      | 205574_x_at  | 7.06 | 1.00E-13   |
| METTL8    | 1554667_s_at | 7.06 | 9.33E-25   |
| HCCS      | 203746_s_at  | 7.06 | 8.02E-22   |
| HSPB11    | 203960_s_at  | 7.06 | 2.14E-33   |
| CSNK2A2   | 203575_at    | 7.06 | 1.48E-20   |
| LGALS3BP  | 200923_at    | 7.05 | 2.58E-20   |
| LOC728554 | 224623_at    | 7.05 | 1.83E-14   |
| COX20     | 224824_at    | 7.05 | 4.78E-28   |
| C9orf123  | 224879_at    | 7.05 | 1.01E-21   |
| PHYH      | 203335_at    | 7.05 | 5.41E-14   |
| DST       | 212254_s_at  | 7.05 | 1.89E-14   |
| MUT       | 202959_at    | 7.04 | 2.11E-24   |
| ABI3BP    | 223395_at    | 7.04 | 2.50E-04   |
| KIN       | 205664_at    | 7.04 | 8.99E-20   |
| NAA50     | 222393_s_at  | 7.04 | 2.03E-20   |
| CTPS1     | 202613_at    | 7.03 | 2.46E-19   |
| ABCE1     | 201873_s_at  | 7.03 | 8.61E-18   |
| GNA12     | 224681_at    | 7.03 | 5.50E-25   |
| SCPEP1    | 218217_at    | 7.03 | 2.02E-17   |
| IL6       | 205207_at    | 7.03 | 3.67E-07   |
| ATP1B3    | 208836_at    | 7.01 | 1.99E-16   |
| WBP4      | 203597_s_at  | 7.01 | 4.58E-22   |
| MAP2K1    | 202670_at    | 7.00 | 1.26E-21   |
| FOXN3     | 218031_s_at  | 7.00 | 6.44E-17   |
| EXOSC4    | 218695_at    | 7.00 | 3.40E-24   |
| BRMS1     | 215631_s_at  | 7.00 | 9.14E-28   |
| DPYSL2    | 200762_at    | 7.00 | 4.18E-16   |
| SMIM3     | 223276_at    | 6.99 | 1.83E-11   |
| TMEM60    | 223396_at    | 6.99 | 7.24E-14   |
| SECISBP2  | 224250_s_at  | 6.99 | 8.60E-21   |
| IFNGR1    | 211676_s_at  | 6.99 | 1.61E-14   |
| DIS3      | 234660_s_at  | 6.99 | < 2.90E-44 |
| LPIN2     | 202459_s_at  | 6.99 | 4.84E-38   |
| NARS      | 200027_at    | 6.97 | 1.55E-14   |
| GCLM      | 203925_at    | 6.97 | 2.15E-12   |

|          |              |      |            |
|----------|--------------|------|------------|
| FAM134C  | 212697_at    | 6.97 | 2.03E-25   |
| LLPH     | 224446_at    | 6.96 | 3.30E-28   |
| UBXN1    | 201871_s_at  | 6.96 | 3.60E-22   |
| SSU72    | 223053_x_at  | 6.96 | 6.51E-31   |
| SFT2D3   | 222763_s_at  | 6.96 | 2.86E-18   |
| STK17B   | 205214_at    | 6.96 | 5.98E-22   |
| MRPS6    | 224919_at    | 6.95 | 1.17E-16   |
| ZCRB1    | 227416_s_at  | 6.95 | 4.46E-34   |
| VPS37A   | 225378_at    | 6.95 | 2.42E-22   |
| PHF5A    | 225309_at    | 6.95 | 1.03E-28   |
| OXSM     | 219133_at    | 6.95 | 8.95E-21   |
| CHCHD10  | 224932_at    | 6.95 | 8.24E-16   |
| TTC9C    | 226175_at    | 6.94 | 3.90E-31   |
| CTBP2    | 210554_s_at  | 6.94 | 1.84E-18   |
| OGDH     | 201282_at    | 6.94 | 1.04E-38   |
| BLVRA    | 203771_s_at  | 6.94 | 2.88E-34   |
| NAP1L4   | 1560339_s_at | 6.94 | 5.16E-39   |
| VEZF1    | 202171_at    | 6.94 | 5.94E-27   |
| RSL24D1  | 217915_s_at  | 6.93 | 1.95E-17   |
| EBF1     | 229487_at    | 6.93 | 5.41E-21   |
| PNKP     | 218961_s_at  | 6.93 | 5.05E-17   |
| LMCD1    | 242767_at    | 6.93 | 1.38E-12   |
| MFAP3    | 213123_at    | 6.92 | 2.50E-22   |
| CABLES1  | 225532_at    | 6.92 | 1.94E-24   |
| IFT52    | 218709_s_at  | 6.92 | 4.37E-21   |
| GTF3C6   | 225083_at    | 6.92 | 1.18E-14   |
| ZNF286A  | 227077_at    | 6.92 | 2.47E-19   |
| TMEM173  | 224929_at    | 6.91 | 1.47E-18   |
| COG8     | 219575_s_at  | 6.91 | 2.49E-23   |
| DNAJC17  | 219861_at    | 6.91 | 1.71E-37   |
| HLA-G    | 211529_x_at  | 6.90 | 1.78E-18   |
| RPS3A    | 200099_s_at  | 6.90 | 1.47E-17   |
| PEAK1    | 225913_at    | 6.90 | 2.20E-21   |
| TMEM200B | 227386_s_at  | 6.90 | 3.73E-16   |
| METRNL   | 225955_at    | 6.89 | 7.46E-13   |
| LYPD1    | 212909_at    | 6.88 | 2.88E-09   |
| GPR124   | 221814_at    | 6.88 | 1.90E-21   |
| FKRP     | 219853_at    | 6.88 | < 2.90E-44 |
| SIGMAR1  | 214484_s_at  | 6.87 | < 2.90E-44 |
| G6PC3    | 44654_at     | 6.87 | 4.90E-27   |
| TMEM222  | 221512_at    | 6.87 | 2.61E-24   |

|          |              |      |            |
|----------|--------------|------|------------|
| BUB1     | 209642_at    | 6.86 | 4.28E-29   |
| DNMT1    | 201697_s_at  | 6.86 | 1.41E-20   |
| LRP5     | 209468_at    | 6.86 | 2.19E-39   |
| GSR      | 205770_at    | 6.86 | 5.73E-27   |
| CENPE    | 205046_at    | 6.86 | 6.19E-30   |
| SEC24A   | 212902_at    | 6.86 | 3.47E-34   |
| DDX49    | 210811_s_at  | 6.86 | 9.86E-37   |
| GEMIN5   | 225712_at    | 6.86 | 1.05E-29   |
| GIT2     | 225558_at    | 6.85 | 6.25E-18   |
| FAM20C   | 226722_at    | 6.85 | 8.18E-18   |
| RHOG     | 203175_at    | 6.85 | 4.25E-19   |
| TFPI     | 213258_at    | 6.85 | 9.59E-10   |
| PHLPP2   | 213407_at    | 6.85 | 1.81E-32   |
| PPIG     | 208993_s_at  | 6.85 | 1.18E-15   |
| RAB24    | 225251_at    | 6.84 | 1.64E-18   |
| GTF3C3   | 218343_s_at  | 6.84 | 2.22E-25   |
| PSMG1    | 203405_at    | 6.84 | 1.64E-18   |
| ATP6     | 1553567_s_at | 6.84 | 1.22E-11   |
| RQCD1    | 1554080_at   | 6.84 | 1.89E-20   |
| RABEP2   | 74694_s_at   | 6.84 | 5.65E-18   |
| FAHD1    | 227960_s_at  | 6.84 | 5.80E-15   |
| LARP4B   | 208954_s_at  | 6.83 | 2.67E-26   |
| HMMR     | 207165_at    | 6.83 | 1.43E-09   |
| MAP1LC3A | 232011_s_at  | 6.83 | < 2.90E-44 |
| SNRNP40  | 215905_s_at  | 6.82 | 2.12E-31   |
| RFTN1    | 212646_at    | 6.82 | 1.70E-14   |
| RBM23    | 219816_s_at  | 6.82 | 7.57E-24   |
| ELF1     | 212420_at    | 6.81 | 8.64E-20   |
| CDK9     | 203198_at    | 6.81 | 5.05E-34   |
| GPD2     | 225447_at    | 6.81 | 5.81E-22   |
| PABPC3   | 208113_x_at  | 6.81 | 7.13E-20   |
| TOR1B    | 209593_s_at  | 6.81 | 1.17E-23   |
| RAI14    | 202052_s_at  | 6.80 | 2.16E-17   |
| PUF60    | 209899_s_at  | 6.80 | 5.70E-22   |
| JTB      | 200048_s_at  | 6.80 | 1.87E-19   |
| GSTM3    | 202554_s_at  | 6.80 | 5.06E-16   |
| SUGP1    | 215004_s_at  | 6.80 | 2.51E-26   |
| UBASH3B  | 238462_at    | 6.79 | < 2.90E-44 |
| CHMP4A   | 218572_at    | 6.79 | 5.63E-26   |
| STX2     | 213434_at    | 6.79 | 2.09E-18   |
| ICMT     | 201611_s_at  | 6.78 | 1.33E-21   |



|              |             |      |          |
|--------------|-------------|------|----------|
| AIMP2        | 202138_x_at | 6.77 | 1.24E-19 |
| WNK1         | 211992_at   | 6.77 | 3.73E-17 |
| EML1         | 204797_s_at | 6.77 | 4.45E-27 |
| CTSC         | 225647_s_at | 6.77 | 2.84E-21 |
| F8A1         | 203274_at   | 6.77 | 2.42E-24 |
| NXN          | 219489_s_at | 6.77 | 2.59E-13 |
| MSH3         | 210947_s_at | 6.77 | 3.60E-35 |
| GRB2         | 223049_at   | 6.77 | 6.18E-22 |
| TYW3         | 227141_at   | 6.76 | 6.07E-16 |
| TAF15        | 202840_at   | 6.76 | 3.75E-21 |
| EHD1         | 209037_s_at | 6.76 | 4.12E-28 |
| SNTB2        | 205315_s_at | 6.76 | 2.83E-19 |
| NUP107       | 218768_at   | 6.75 | 3.22E-16 |
| PREB         | 217861_s_at | 6.75 | 2.81E-20 |
| STYXL1       | 233982_x_at | 6.75 | 1.43E-29 |
| ZBTB43       | 204182_s_at | 6.75 | 2.48E-36 |
| MIR1236      | 209219_at   | 6.75 | 2.01E-18 |
| SPTBN1       | 212071_s_at | 6.75 | 1.82E-16 |
| THOC2        | 222122_s_at | 6.75 | 3.72E-19 |
| C17orf61     | 56197_at    | 6.75 | 1.43E-18 |
| KPNA4        | 225267_at   | 6.75 | 7.35E-25 |
| TAPBP        | 208829_at   | 6.74 | 9.03E-19 |
| MCM10        | 220651_s_at | 6.74 | 5.43E-35 |
| APOOL        | 213289_at   | 6.74 | 1.09E-42 |
| CPNE1        | 206918_s_at | 6.74 | 5.63E-20 |
| LOC100506639 | 214741_at   | 6.74 | 6.12E-18 |
| GLT8D2       | 221447_s_at | 6.74 | 5.79E-15 |
| ACOX2        | 205364_at   | 6.73 | 2.40E-27 |
| LOC728392    | 218380_at   | 6.73 | 9.67E-14 |
| TUSC2        | 203272_s_at | 6.73 | 5.88E-38 |
| PPM1A        | 203966_s_at | 6.73 | 1.14E-15 |
| MYL12B       | 221474_at   | 6.73 | 7.30E-18 |
| PSD3         | 218613_at   | 6.72 | 5.05E-12 |
| TBX3         | 219682_s_at | 6.72 | 2.23E-18 |
| IFI30        | 201422_at   | 6.72 | 1.12E-11 |
| UNC13B       | 202893_at   | 6.72 | 5.07E-29 |
| PSMD2        | 200830_at   | 6.72 | 4.47E-22 |
| SEC24C       | 202361_at   | 6.72 | 3.16E-20 |
| C14orf142    | 223273_at   | 6.72 | 1.04E-26 |
| ANAPC1       | 231973_s_at | 6.72 | 3.45E-31 |
| SPG11        | 203513_at   | 6.72 | 1.69E-22 |

|              |              |      |            |
|--------------|--------------|------|------------|
| COX17        | 203880_at    | 6.71 | 8.81E-21   |
| YTHDF1       | 221741_s_at  | 6.71 | 3.70E-23   |
| AKT1S1       | 224982_at    | 6.71 | < 2.90E-44 |
| TRPM7        | 223324_s_at  | 6.71 | 1.08E-28   |
| MIR4800      | 212347_x_at  | 6.70 | 1.40E-30   |
| RAB5A        | 206113_s_at  | 6.70 | < 2.90E-44 |
| HDGF         | 200896_x_at  | 6.70 | 5.89E-20   |
| KIAA2013     | 224706_at    | 6.69 | 2.90E-24   |
| PLAU         | 211668_s_at  | 6.69 | 5.47E-19   |
| POLD2        | 201115_at    | 6.69 | 2.01E-21   |
| SNRNP27      | 212440_at    | 6.69 | 6.76E-18   |
| IL10RB       | 209575_at    | 6.68 | 8.21E-22   |
| ATR          | 209902_at    | 6.68 | 1.53E-20   |
| ZCCHC10      | 1559399_s_at | 6.68 | < 2.90E-44 |
| LARP7        | 212785_s_at  | 6.67 | 8.62E-23   |
| SPATA5L1     | 222163_s_at  | 6.67 | 4.44E-21   |
| UCKL1        | 218533_s_at  | 6.67 | 1.18E-17   |
| EHBP1L1      | 91703_at     | 6.67 | 1.37E-37   |
| ENSA         | 202596_at    | 6.67 | 5.04E-20   |
| PEAR1        | 228618_at    | 6.66 | 4.36E-27   |
| RAB21        | 203885_at    | 6.66 | 2.01E-14   |
| RNF10        | 207801_s_at  | 6.66 | 4.13E-25   |
| NDUFB3       | 203371_s_at  | 6.66 | 2.94E-23   |
| EBNA1BP2     | 201323_at    | 6.66 | 2.73E-20   |
| NDUFS2       | 201966_at    | 6.65 | 6.96E-21   |
| ZFHX4        | 219779_at    | 6.65 | 9.00E-31   |
| MRPL3        | 208787_at    | 6.65 | 1.66E-15   |
| LOC93622     | 225391_at    | 6.65 | 2.20E-20   |
| CMC4         | 216862_s_at  | 6.64 | 3.90E-21   |
| SEL1L3       | 212314_at    | 6.64 | 2.23E-10   |
| DHX16        | 203694_s_at  | 6.64 | 3.21E-24   |
| AGTRAP       | 1555736_a_at | 6.64 | 1.66E-36   |
| MAVS         | 229741_at    | 6.63 | 3.37E-40   |
| NCS1         | 230146_s_at  | 6.63 | 1.47E-35   |
| CCDC34       | 226287_at    | 6.63 | 1.07E-12   |
| DES1         | 212527_at    | 6.63 | 3.84E-28   |
| HDAC5        | 202455_at    | 6.63 | 3.40E-27   |
| ACAT2        | 209608_s_at  | 6.63 | 5.31E-28   |
| LOC100506029 | 228661_s_at  | 6.63 | 4.32E-23   |
| PYCARD       | 221666_s_at  | 6.63 | 2.76E-16   |
| SNRPD3       | 202567_at    | 6.62 | 3.66E-19   |

|               |             |      |            |
|---------------|-------------|------|------------|
| ZNF318        | 203521_s_at | 6.62 | 6.07E-29   |
| MIS18A        | 228597_at   | 6.62 | 1.61E-17   |
| EIF2D         | 218253_s_at | 6.62 | 5.81E-22   |
| PABPC1///RLIM | 215823_x_at | 6.62 | 5.03E-19   |
| AGO2          | 225827_at   | 6.62 | 1.46E-32   |
| PSG5          | 204830_x_at | 6.62 | 6.88E-28   |
| MRPL14        | 225201_s_at | 6.62 | 2.34E-22   |
| C4orf33       | 1552370_at  | 6.62 | < 2.90E-44 |
| SAAL1         | 225614_at   | 6.61 | 7.29E-39   |
| PEX19         | 201707_at   | 6.61 | 3.20E-25   |
| FAM134A       | 218037_at   | 6.61 | 5.26E-23   |
| FEN1          | 204768_s_at | 6.61 | 4.95E-35   |
| SLC22A4       | 205896_at   | 6.61 | 3.09E-31   |
| FAM168B       | 212017_at   | 6.61 | 5.06E-22   |
| RAB11FIP2     | 203884_s_at | 6.61 | 9.43E-19   |
| ZNF271        | 211009_s_at | 6.60 | 3.34E-27   |
| CDCA2         | 226661_at   | 6.60 | 1.42E-30   |
| IVNS1ABP      | 206245_s_at | 6.60 | 2.86E-16   |
| CEBPZ         | 203341_at   | 6.60 | 1.61E-20   |
| CYB5B         | 201633_s_at | 6.60 | 1.86E-36   |
| DNPEP         | 201937_s_at | 6.60 | 2.63E-19   |
| C16orf45      | 212736_at   | 6.59 | 7.42E-20   |
| ECHDC1        | 233124_s_at | 6.59 | 1.40E-21   |
| EIF4A3        | 201303_at   | 6.59 | 2.09E-19   |
| CCDC107       | 229063_s_at | 6.59 | 1.70E-28   |
| AES           | 217729_s_at | 6.59 | 3.49E-31   |
| ZBTB38        | 219221_at   | 6.59 | 2.60E-15   |
| TMPO          | 203432_at   | 6.59 | 1.33E-20   |
| TGIF1         | 203313_s_at | 6.59 | 2.09E-18   |
| TARDBP        | 200020_at   | 6.59 | 4.06E-21   |
| EED           | 209572_s_at | 6.58 | 8.32E-21   |
| FAM92A1       | 235391_at   | 6.58 | 9.34E-20   |
| IER3IP1       | 223071_at   | 6.57 | 2.73E-13   |
| APRT          | 203219_s_at | 6.57 | 5.48E-19   |
| UHRF1         | 225655_at   | 6.57 | 9.01E-17   |
| CEP57         | 203492_x_at | 6.57 | 2.45E-35   |
| MEAF6         | 218165_at   | 6.57 | 1.51E-21   |
| ANGEL2        | 221826_at   | 6.57 | 1.29E-35   |
| ZDHHC24       | 205634_x_at | 6.56 | 1.64E-29   |
| SUCLA2        | 202930_s_at | 6.56 | 4.92E-13   |
| NR3C1         | 211671_s_at | 6.56 | 4.51E-13   |

|              |             |      |            |
|--------------|-------------|------|------------|
| ELL2         | 226982_at   | 6.55 | 9.98E-11   |
| APOO         | 221620_s_at | 6.55 | 5.73E-32   |
| SRP9         | 201273_s_at | 6.55 | 8.66E-16   |
| RFT1         | 226060_at   | 6.55 | 5.97E-25   |
| TCTA         | 203054_s_at | 6.55 | 3.07E-28   |
| GJC1         | 228776_at   | 6.55 | 3.99E-11   |
| STAM2        | 215044_s_at | 6.55 | 1.86E-38   |
| PRPF8        | 200000_s_at | 6.55 | 1.65E-21   |
| METTL3       | 209265_s_at | 6.54 | 4.07E-18   |
| LZIC         | 226087_at   | 6.54 | 5.31E-21   |
| FAM129B      | 223019_at   | 6.54 | 1.02E-23   |
| CIRBP        | 230142_s_at | 6.54 | 2.19E-15   |
| WDR18        | 209461_x_at | 6.54 | 5.81E-29   |
| WDR70        | 219193_at   | 6.53 | 5.15E-20   |
| RASA3        | 225562_at   | 6.53 | 1.19E-27   |
| HIF1AN       | 226648_at   | 6.53 | 8.32E-23   |
| FAM192A      | 217896_s_at | 6.53 | 3.46E-23   |
| FAHD2A       | 218504_at   | 6.53 | 5.28E-22   |
| TRIM32       | 203846_at   | 6.53 | 1.67E-29   |
| CDK5RAP2     | 233540_s_at | 6.52 | 3.16E-17   |
| TPBG         | 203476_at   | 6.52 | 4.39E-13   |
| MINK1        | 214246_x_at | 6.52 | 7.34E-22   |
| PRDM16       | 232424_at   | 6.52 | 1.55E-29   |
| NEO1         | 204321_at   | 6.51 | 1.35E-27   |
| ZDHC16       | 223212_at   | 6.51 | 1.02E-18   |
| RBM22        | 224068_x_at | 6.51 | 5.11E-30   |
| CLN3         | 210859_x_at | 6.50 | 3.28E-30   |
| SRD5A3       | 222750_s_at | 6.50 | 2.60E-16   |
| LOC150776    | 207856_s_at | 6.50 | 6.18E-25   |
| DNTTIP2      | 202776_at   | 6.50 | 4.22E-23   |
| PRKAR2A      | 225000_at   | 6.50 | 2.37E-26   |
| SETX         | 201964_at   | 6.50 | 1.11E-17   |
| FAM173A      | 219709_x_at | 6.50 | 1.61E-20   |
| GOSR2        | 210009_s_at | 6.50 | 2.03E-36   |
| KIAA1967     | 225187_at   | 6.50 | 8.02E-31   |
| LOC100506365 | 227765_at   | 6.50 | 1.57E-19   |
| EVA1B        | 221710_x_at | 6.50 | 8.95E-18   |
| MAT2A        | 200769_s_at | 6.50 | < 2.90E-44 |
| PIGP         | 221689_s_at | 6.49 | 2.53E-18   |
| C18orf21     | 223526_at   | 6.49 | 1.68E-19   |
| YAF2         | 206238_s_at | 6.49 | < 2.90E-44 |

|           |             |      |            |
|-----------|-------------|------|------------|
| BCKDHB    | 210653_s_at | 6.48 | 8.83E-35   |
| ISY1      | 223831_x_at | 6.48 | 1.29E-37   |
| MTHFD2    | 201761_at   | 6.48 | 4.62E-08   |
| KIF20A    | 218755_at   | 6.48 | 1.03E-13   |
| IMPA2     | 203126_at   | 6.47 | 1.45E-14   |
| TRIB3     | 218145_at   | 6.47 | 6.30E-17   |
| ZDHHC2    | 222730_s_at | 6.47 | 7.23E-36   |
| BIVM      | 233255_s_at | 6.47 | 1.96E-22   |
| SETD9     | 238465_at   | 6.47 | 3.18E-23   |
| SNUPN     | 207438_s_at | 6.47 | 1.52E-23   |
| NRD1      | 208709_s_at | 6.47 | 2.59E-25   |
| AVPI1     | 218631_at   | 6.47 | 1.40E-17   |
| C16orf58  | 217891_at   | 6.46 | 3.07E-26   |
| RASAL2    | 219026_s_at | 6.46 | < 2.90E-44 |
| PJA2      | 201133_s_at | 6.46 | 4.74E-14   |
| ZBTB21    | 233952_s_at | 6.46 | 2.65E-11   |
| ABHD14B   | 224821_at   | 6.46 | 1.79E-26   |
| LITAF     | 200706_s_at | 6.46 | 6.12E-17   |
| FNDC1     | 226930_at   | 6.46 | 2.55E-06   |
| FLNB      | 208613_s_at | 6.45 | 4.37E-22   |
| CCDC115   | 224946_s_at | 6.45 | 3.61E-20   |
| KIAA0430  | 202386_s_at | 6.45 | 2.80E-14   |
| RFNG      | 212968_at   | 6.44 | 6.27E-27   |
| PTTG1IP   | 200677_at   | 6.44 | 3.77E-17   |
| CARS      | 212971_at   | 6.44 | 8.07E-20   |
| ZNF622    | 225152_at   | 6.44 | 8.39E-24   |
| LRRC47    | 212904_at   | 6.44 | 2.28E-23   |
| WDFY1     | 224800_at   | 6.43 | 1.03E-12   |
| PDP1      | 222572_at   | 6.43 | 1.99E-11   |
| NFASC     | 213438_at   | 6.43 | 2.15E-13   |
| PAFAH1B3  | 203228_at   | 6.43 | 3.62E-19   |
| GATAD2A   | 234294_x_at | 6.43 | 2.12E-22   |
| NTN4      | 223315_at   | 6.43 | 1.45E-08   |
| ORC2      | 204853_at   | 6.43 | 8.47E-31   |
| ZNF148    | 203319_s_at | 6.43 | 1.05E-24   |
| IDS       | 206342_x_at | 6.43 | 4.95E-18   |
| LINC00493 | 226236_at   | 6.43 | 2.26E-23   |
| PROCR     | 203650_at   | 6.42 | 2.87E-20   |
| SCAMP3    | 201771_at   | 6.42 | 2.88E-20   |
| DDX39A    | 201584_s_at | 6.42 | 3.06E-13   |
| AGO3      | 219426_at   | 6.42 | 3.99E-24   |

|          |             |      |          |
|----------|-------------|------|----------|
| MXRA8    | 213422_s_at | 6.42 | 5.73E-17 |
| TMEM54   | 202090_s_at | 6.42 | 8.79E-17 |
| SART3    | 209127_s_at | 6.41 | 5.35E-13 |
| CYP20A1  | 219565_at   | 6.41 | 6.95E-35 |
| COA1     | 209445_x_at | 6.41 | 1.37E-25 |
| KHSRP    | 204372_s_at | 6.41 | 7.23E-21 |
| LSM14A   | 212131_at   | 6.40 | 3.51E-18 |
| NDUFS6   | 203606_at   | 6.40 | 2.73E-21 |
| MRPL12   | 203931_s_at | 6.40 | 5.57E-17 |
| IDE      | 203327_at   | 6.40 | 3.73E-18 |
| NFYB     | 218129_s_at | 6.40 | 2.05E-31 |
| DBN1     | 202806_at   | 6.39 | 1.83E-26 |
| WDR37    | 211383_s_at | 6.39 | 9.34E-20 |
| DALRD3   | 221934_s_at | 6.39 | 9.36E-27 |
| CLCN4    | 214769_at   | 6.39 | 5.26E-30 |
| QPCT     | 205174_s_at | 6.39 | 4.35E-16 |
| TOLLIP   | 217930_s_at | 6.38 | 1.61E-29 |
| NUMB     | 209073_s_at | 6.37 | 1.65E-25 |
| AKIP1    | 219953_s_at | 6.37 | 6.67E-35 |
| ASCC3    | 212815_at   | 6.37 | 6.49E-17 |
| UBAC2    | 224298_s_at | 6.37 | 5.37E-23 |
| LIMS1    | 207198_s_at | 6.37 | 1.49E-16 |
| COLEC12  | 221019_s_at | 6.37 | 5.24E-08 |
| SLC2A14  | 222088_s_at | 6.36 | 9.07E-15 |
| TPRA1    | 218855_at   | 6.35 | 1.99E-29 |
| PTCD2    | 1555910_at  | 6.35 | 1.57E-23 |
| SMAD5    | 235451_at   | 6.35 | 6.81E-19 |
| IFI16    | 208966_x_at | 6.35 | 7.34E-13 |
| HOXA5    | 213844_at   | 6.35 | 7.81E-08 |
| NADK2    | 226946_at   | 6.35 | 2.29E-36 |
| BIN1     | 214439_x_at | 6.34 | 7.18E-18 |
| C11orf31 | 231045_x_at | 6.34 | 1.56E-22 |
| ZNF689   | 227445_at   | 6.34 | 5.36E-29 |
| TRIP13   | 204033_at   | 6.33 | 5.85E-14 |
| SCAMP4   | 213244_at   | 6.33 | 4.00E-34 |
| BTBD1    | 217945_at   | 6.33 | 4.95E-19 |
| IFT27    | 205037_at   | 6.33 | 2.46E-29 |
| MGEA5    | 200899_s_at | 6.33 | 2.75E-18 |
| NLN      | 225943_at   | 6.33 | 9.89E-24 |
| GTPBP10  | 234311_s_at | 6.33 | 4.00E-20 |
| TPST2    | 204079_at   | 6.32 | 7.52E-15 |

|          |             |      |          |
|----------|-------------|------|----------|
| MEGF9    | 212830_at   | 6.32 | 6.53E-26 |
| KDM3B    | 210878_s_at | 6.32 | 2.19E-18 |
| DPYSL4   | 205493_s_at | 6.31 | 4.95E-17 |
| ATG12    | 204833_at   | 6.31 | 7.70E-43 |
| SRD5A1   | 210959_s_at | 6.31 | 2.94E-29 |
| PFKM     | 210976_s_at | 6.31 | 1.79E-15 |
| HK2      | 202934_at   | 6.31 | 1.06E-11 |
| PDE4DIP  | 210305_at   | 6.30 | 3.81E-26 |
| MPI      | 202472_at   | 6.30 | 4.10E-33 |
| RAE1     | 211318_s_at | 6.30 | 1.70E-29 |
| FDX1     | 203647_s_at | 6.30 | 2.80E-12 |
| NXF1     | 208922_s_at | 6.29 | 2.82E-20 |
| SCARA3   | 219416_at   | 6.29 | 3.86E-26 |
| DHPS     | 211558_s_at | 6.29 | 6.13E-27 |
| BDKRB1   | 207510_at   | 6.29 | 2.64E-25 |
| BCL7C    | 219072_at   | 6.29 | 4.39E-23 |
| CTSO     | 203758_at   | 6.29 | 1.47E-15 |
| FAM20B   | 202915_s_at | 6.29 | 1.02E-36 |
| TRIM27   | 210541_s_at | 6.28 | 2.02E-39 |
| SIVA1    | 203489_at   | 6.28 | 1.52E-27 |
| MAPKAP1  | 217808_s_at | 6.28 | 1.49E-23 |
| API5     | 201687_s_at | 6.28 | 6.57E-22 |
| KAT6A    | 226547_at   | 6.28 | 2.60E-19 |
| PARVB    | 37966_at    | 6.28 | 1.44E-23 |
| CASC3    | 207842_s_at | 6.28 | 2.63E-23 |
| PAPD7    | 202466_at   | 6.27 | 1.02E-25 |
| BRPF3    | 225217_s_at | 6.27 | 7.36E-34 |
| SNHG1    | 224610_at   | 6.26 | 9.03E-17 |
| NUDC     | 210574_s_at | 6.26 | 1.89E-19 |
| MLLT1    | 224993_at   | 6.26 | 5.24E-25 |
| MIA3     | 212305_s_at | 6.26 | 1.42E-30 |
| MFN1     | 207098_s_at | 6.26 | 9.83E-21 |
| C12orf4  | 218374_s_at | 6.26 | 3.11E-25 |
| TRIM4    | 223384_s_at | 6.26 | 1.60E-14 |
| EXOC2    | 219349_s_at | 6.26 | 1.53E-33 |
| PDAP1    | 202290_at   | 6.25 | 4.49E-29 |
| DYNC1LI1 | 217976_s_at | 6.25 | 2.18E-19 |
| ADAMTS5  | 229357_at   | 6.25 | 4.75E-06 |
| NAGPA    | 205090_s_at | 6.25 | 6.07E-22 |
| MN1      | 205330_at   | 6.25 | 4.54E-15 |
| CPT1A    | 203633_at   | 6.25 | 6.46E-26 |

|          |              |      |            |
|----------|--------------|------|------------|
| FAM45A   | 222955_s_at  | 6.25 | 5.48E-39   |
| TOX4     | 201685_s_at  | 6.24 | 6.48E-26   |
| C1S      | 1555229_a_at | 6.24 | < 2.90E-44 |
| PPM1D    | 204566_at    | 6.24 | 9.23E-13   |
| MPDU1    | 209208_at    | 6.24 | 3.24E-43   |
| HOTAIRM1 | 1557051_s_at | 6.24 | 3.85E-26   |
| ENOPH1   | 217956_s_at  | 6.24 | 6.51E-14   |
| MOB4     | 202919_at    | 6.23 | 4.89E-17   |
| GAR1     | 219110_at    | 6.23 | 3.34E-13   |
| MXI1     | 202364_at    | 6.23 | 2.99E-14   |
| CLASP1   | 212752_at    | 6.23 | 2.03E-27   |
| GALNS    | 206335_at    | 6.23 | 5.93E-20   |
| ERBB2IP  | 222473_s_at  | 6.23 | 3.83E-11   |
| C1orf53  | 1558508_a_at | 6.23 | 5.87E-10   |
| DNAJC14  | 223420_at    | 6.22 | 4.84E-23   |
| CNOT3    | 203239_s_at  | 6.22 | < 2.90E-44 |
| GPRC5A   | 203108_at    | 6.22 | 4.44E-08   |
| NET1     | 201830_s_at  | 6.22 | 4.89E-06   |
| ALG14    | 1553954_at   | 6.22 | 6.17E-22   |
| OS9      | 215399_s_at  | 6.22 | 2.62E-22   |
| CFLAR    | 210563_x_at  | 6.22 | 6.41E-22   |
| CPSF1    | 201639_s_at  | 6.21 | 1.28E-13   |
| FGFR1OP  | 205588_s_at  | 6.21 | 2.44E-34   |
| SAP30BP  | 217965_s_at  | 6.21 | 9.93E-25   |
| TNFAIP6  | 206025_s_at  | 6.21 | 1.28E-09   |
| CTNND1   | 208407_s_at  | 6.20 | 2.37E-18   |
| SMPDL3A  | 213624_at    | 6.20 | 8.95E-18   |
| MGME1    | 225890_at    | 6.20 | 4.94E-21   |
| EDEM3    | 223243_s_at  | 6.20 | 3.05E-16   |
| MIR4746  | 223012_at    | 6.19 | 5.14E-15   |
| DAGLB    | 225833_at    | 6.19 | < 2.90E-44 |
| PNKD     | 225298_at    | 6.19 | 1.14E-23   |
| ISCA2    | 226007_at    | 6.19 | 4.00E-15   |
| SUPV3L1  | 212894_at    | 6.19 | 1.51E-21   |
| DTL      | 218585_s_at  | 6.18 | 5.84E-13   |
| PKN2     | 212629_s_at  | 6.18 | 5.79E-15   |
| CHST12   | 218927_s_at  | 6.18 | 6.20E-19   |
| C11orf1  | 222785_x_at  | 6.17 | 7.22E-18   |
| UBR7     | 218108_at    | 6.17 | 9.07E-21   |
| UBL7     | 225063_at    | 6.17 | 4.24E-30   |
| C8orf33  | 218187_s_at  | 6.17 | 1.18E-15   |



|                    |              |      |            |
|--------------------|--------------|------|------------|
| GNE                | 205042_at    | 6.17 | 8.45E-16   |
| UCHL5              | 219960_s_at  | 6.17 | 5.19E-22   |
| STX6               | 212799_at    | 6.17 | 7.37E-18   |
| RAD50              | 208393_s_at  | 6.17 | 6.86E-18   |
| FBXO22             | 225736_at    | 6.17 | 1.53E-16   |
| USP4               | 211800_s_at  | 6.16 | 5.58E-20   |
| TBC1D23            | 225121_at    | 6.16 | 9.49E-22   |
| RAB3GAP1           | 212932_at    | 6.16 | 1.78E-33   |
| CDS2               | 212862_at    | 6.16 | 4.73E-36   |
| TTC17              | 224852_at    | 6.16 | 1.47E-19   |
| NUDCD1             | 225439_at    | 6.16 | 2.57E-19   |
| C6orf48            | 220755_s_at  | 6.15 | 2.66E-14   |
| CAP2               | 212551_at    | 6.15 | 1.98E-14   |
| DNAJC19            | 225359_at    | 6.15 | 5.79E-24   |
| DSEL               | 232235_at    | 6.15 | 1.43E-08   |
| GRN                | 216041_x_at  | 6.15 | 2.91E-15   |
| NEK7               | 212530_at    | 6.15 | 1.01E-07   |
| ROCK1              | 214578_s_at  | 6.15 | 3.14E-39   |
| CARKD              | 217940_s_at  | 6.14 | 1.09E-15   |
| ZNRF1              | 223383_at    | 6.14 | 1.01E-30   |
| ANXA11             | 206200_s_at  | 6.14 | 1.15E-17   |
| C1orf216           | 212791_at    | 6.13 | 6.95E-21   |
| POP7               | 209482_at    | 6.13 | 2.79E-23   |
| ADORA2B            | 205891_at    | 6.13 | 1.40E-43   |
| SLMO2              | 217851_s_at  | 6.12 | 5.53E-13   |
| FMN2               | 1555471_a_at | 6.12 | < 2.90E-44 |
| LEPREL2            | 204854_at    | 6.12 | 1.35E-19   |
| CES2               | 209667_at    | 6.12 | 4.85E-21   |
| IWS1               | 224768_at    | 6.12 | 2.48E-31   |
| TRAPPC2            | 209751_s_at  | 6.12 | 4.77E-22   |
| OTTHUMG00000014155 | 216532_x_at  | 6.11 | < 2.90E-44 |
| PTRHD1             | 226243_at    | 6.11 | 5.63E-13   |
| HLA-A              | 215313_x_at  | 6.11 | 3.86E-18   |
| LRP12              | 219631_at    | 6.11 | 4.83E-27   |
| CEP63              | 222151_s_at  | 6.10 | 3.41E-35   |
| EFTUD2             | 222398_s_at  | 6.10 | 4.96E-24   |
| ADIPOR1            | 217748_at    | 6.10 | 4.28E-22   |
| ARHGAP5            | 217936_at    | 6.10 | 1.07E-14   |
| DNASE2             | 214992_s_at  | 6.10 | 1.81E-36   |
| HYLS1              | 227687_at    | 6.10 | 5.62E-24   |
| LOC339803          | 227941_at    | 6.10 | 2.22E-24   |

|          |             |      |            |
|----------|-------------|------|------------|
| MOV10    | 223849_s_at | 6.10 | 1.87E-26   |
| FAM118B  | 223386_at   | 6.09 | 2.00E-16   |
| TMEM8A   | 221882_s_at | 6.09 | 3.97E-31   |
| DNAJC1   | 222621_at   | 6.09 | 2.07E-19   |
| KIAA1468 | 225508_at   | 6.09 | 1.66E-30   |
| TINF2    | 220052_s_at | 6.09 | 2.26E-30   |
| CPD      | 201940_at   | 6.09 | 7.80E-20   |
| DGCR8    | 218650_at   | 6.09 | 1.26E-21   |
| ISCU     | 209075_s_at | 6.09 | 2.75E-16   |
| SOWAHC   | 227034_at   | 6.09 | 9.03E-13   |
| SIK3     | 204156_at   | 6.08 | < 2.90E-44 |
| KIAA0196 | 201985_at   | 6.08 | 4.81E-24   |
| DIS3L    | 235005_at   | 6.08 | 2.68E-25   |
| DYNLT3   | 203303_at   | 6.08 | 3.76E-11   |
| RNF170   | 220985_s_at | 6.08 | 6.31E-23   |
| ARFGAP2  | 211975_at   | 6.08 | 2.19E-24   |
| AGPAT1   | 215535_s_at | 6.08 | 3.94E-24   |
| NTPCR    | 223272_s_at | 6.07 | 8.42E-18   |
| FTSJ2    | 218356_at   | 6.07 | 7.87E-17   |
| DUSP3    | 201537_s_at | 6.07 | 8.90E-27   |
| FAM19A5  | 229459_at   | 6.07 | 4.39E-13   |
| STX7     | 212632_at   | 6.07 | 1.10E-15   |
| KIF23    | 204709_s_at | 6.07 | 1.09E-14   |
| CENPA    | 204962_s_at | 6.07 | 5.76E-11   |
| GTF3C2   | 212429_s_at | 6.06 | 4.66E-24   |
| CREM     | 207630_s_at | 6.06 | 1.33E-21   |
| CDC42EP1 | 204693_at   | 6.06 | 4.73E-36   |
| ATRN     | 211852_s_at | 6.06 | 1.13E-36   |
| MRPS35   | 217942_at   | 6.06 | 9.35E-19   |
| MT1HL1   | 211456_x_at | 6.06 | 7.60E-11   |
| CUEDC2   | 218097_s_at | 6.06 | 9.49E-21   |
| CRTC3    | 218648_at   | 6.06 | 3.18E-19   |
| SUMF1    | 226850_at   | 6.06 | 1.37E-17   |
| ATG14    | 204568_at   | 6.05 | 2.92E-25   |
| TUBA1A   | 209118_s_at | 6.05 | 5.71E-15   |
| CCBL2    | 209472_at   | 6.04 | 9.50E-16   |
| MIR1292  | 200875_s_at | 6.04 | 1.54E-19   |
| TMEM185B | 219253_at   | 6.04 | 9.36E-26   |
| ALDH9A1  | 201612_at   | 6.03 | 1.01E-15   |
| GBE1     | 203282_at   | 6.03 | 1.45E-13   |
| VPS45    | 209268_at   | 6.03 | 1.92E-18   |

|              |             |      |          |
|--------------|-------------|------|----------|
| ASB8         | 226861_at   | 6.02 | 1.92E-26 |
| BET1L        | 223023_at   | 6.02 | 3.62E-26 |
| FHOD1        | 218530_at   | 6.02 | 9.78E-18 |
| DTNBP1       | 223446_s_at | 6.02 | 5.34E-29 |
| TMEM167B     | 222495_at   | 6.02 | 7.94E-13 |
| TSPAN6       | 209109_s_at | 6.02 | 5.41E-13 |
| CCDC47       | 222432_s_at | 6.02 | 1.44E-20 |
| RPAIN        | 228183_s_at | 6.02 | 1.52E-23 |
| SGCD         | 210330_at   | 6.01 | 3.60E-22 |
| TBC1D9       | 212956_at   | 6.01 | 1.29E-10 |
| WAPAL        | 212264_s_at | 6.01 | 1.65E-17 |
| TMEM98       | 223170_at   | 6.01 | 2.93E-19 |
| FBXO5        | 234863_x_at | 6.01 | 9.98E-36 |
| ZNF605       | 227822_at   | 6.01 | 2.32E-25 |
| SNED1        | 213488_at   | 6.01 | 4.47E-14 |
| TMEM256      | 227063_at   | 6.01 | 1.81E-23 |
| RNF34        | 219035_s_at | 6.00 | 6.84E-23 |
| PHACTR4      | 219235_s_at | 6.00 | 1.84E-34 |
| TICAM2       | 228234_at   | 6.00 | 1.09E-08 |
| ELOVL5       | 208788_at   | 6.00 | 3.39E-14 |
| SLC25A4      | 202825_at   | 6.00 | 5.04E-16 |
| RNF149       | 225414_at   | 5.99 | 1.75E-12 |
| MTMR11       | 205076_s_at | 5.99 | 1.92E-28 |
| EMX2         | 221950_at   | 5.99 | 7.30E-07 |
| ATF4         | 200779_at   | 5.99 | 7.55E-21 |
| ITPR3        | 201188_s_at | 5.99 | 5.78E-26 |
| LOC100507303 | 228049_x_at | 5.98 | 4.95E-12 |
| KRR1         | 203202_at   | 5.98 | 3.10E-18 |
| DCAF8        | 202250_s_at | 5.98 | 3.33E-24 |
| ARV1         | 223223_at   | 5.98 | 3.69E-19 |
| LDOC1L       | 223228_at   | 5.98 | 2.84E-22 |
| ALG2         | 225621_at   | 5.98 | 1.94E-17 |
| UNC50        | 203583_at   | 5.98 | 1.58E-15 |
| AIP          | 201781_s_at | 5.98 | 1.64E-39 |
| CMSS1        | 224523_s_at | 5.98 | 4.88E-21 |
| LCLAT1       | 226996_at   | 5.98 | 8.25E-18 |
| MRAP2        | 227226_at   | 5.97 | 3.35E-14 |
| RNF123       | 224186_s_at | 5.97 | 2.69E-25 |
| HYI          | 223622_s_at | 5.97 | 2.59E-28 |
| SOGA2        | 213358_at   | 5.97 | 3.60E-14 |
| WHSC1L1      | 222544_s_at | 5.97 | 3.67E-17 |

|              |              |      |            |
|--------------|--------------|------|------------|
| SON          | 201086_x_at  | 5.97 | 1.09E-20   |
| SLC33A1      | 203165_s_at  | 5.97 | 1.15E-14   |
| SPPL3        | 224640_at    | 5.97 | 8.56E-27   |
| FBXO16       | 223216_x_at  | 5.97 | 6.10E-16   |
| RPS17        | 211487_x_at  | 5.97 | 2.53E-15   |
| NDNL2        | 226008_at    | 5.96 | 1.41E-37   |
| CDC34        | 212540_at    | 5.96 | 4.34E-23   |
| SCML1        | 218793_s_at  | 5.96 | 2.91E-14   |
| CRLS1        | 223978_s_at  | 5.96 | 8.29E-15   |
| PDCD2        | 213581_at    | 5.95 | 9.58E-21   |
| CCDC117      | 225644_at    | 5.95 | 1.35E-17   |
| PHGDH        | 201397_at    | 5.95 | 3.19E-16   |
| CCND3        | 201700_at    | 5.95 | 6.01E-17   |
| CHAMP1       | 226194_at    | 5.95 | 6.37E-40   |
| MMAB         | 225826_at    | 5.95 | 8.45E-23   |
| SLC41A1      | 225570_at    | 5.94 | 1.05E-39   |
| MRPS21       | 222997_s_at  | 5.94 | 2.22E-16   |
| HUS1         | 204883_s_at  | 5.94 | 2.49E-27   |
| WDR41        | 222503_s_at  | 5.94 | 1.52E-15   |
| ZNF593       | 204175_at    | 5.94 | 5.54E-21   |
| BRD3         | 203825_at    | 5.94 | 1.81E-18   |
| KATNA1       | 205526_s_at  | 5.93 | 8.37E-19   |
| FUT8         | 1554930_a_at | 5.93 | < 2.90E-44 |
| SEC62        | 208943_s_at  | 5.93 | 4.15E-15   |
| PRPSAP1      | 202529_at    | 5.92 | 3.75E-25   |
| FAM214A      | 225327_at    | 5.92 | 2.30E-17   |
| PPP2R1B      | 202886_s_at  | 5.92 | 3.40E-32   |
| RAB13        | 202252_at    | 5.92 | 6.34E-16   |
| RAB2B        | 225074_at    | 5.92 | 4.95E-22   |
| SUMF2        | 225002_s_at  | 5.91 | 1.99E-34   |
| NOC3L        | 218889_at    | 5.91 | 1.16E-18   |
| TWSG1        | 219201_s_at  | 5.91 | 1.01E-19   |
| WBSCR22      | 207628_s_at  | 5.91 | 6.33E-23   |
| LOC101060503 | 201009_s_at  | 5.91 | 6.82E-13   |
| POLI         | 219317_at    | 5.91 | 2.68E-17   |
| DNAJC6       | 204720_s_at  | 5.91 | 1.10E-26   |
| CEPT1        | 219375_at    | 5.91 | 8.51E-16   |
| SMYD2        | 212922_s_at  | 5.90 | 4.54E-19   |
| ITGA10       | 206766_at    | 5.90 | 8.75E-28   |
| AGAP2-AS1    | 1555907_at   | 5.90 | 4.76E-27   |
| TK1          | 1554408_a_at | 5.90 | 7.04E-33   |

|          |             |      |          |
|----------|-------------|------|----------|
| ASB3     | 224524_s_at | 5.90 | 2.32E-14 |
| USE1     | 219348_at   | 5.90 | 9.33E-19 |
| ADSS     | 221761_at   | 5.90 | 1.76E-15 |
| PID1     | 219093_at   | 5.90 | 9.42E-10 |
| NUP35    | 225470_at   | 5.89 | 1.01E-18 |
| C5orf30  | 221823_at   | 5.89 | 9.10E-15 |
| SLC25A36 | 201917_s_at | 5.89 | 4.79E-15 |
| AIFM2    | 224461_s_at | 5.89 | 2.31E-24 |
| PREP     | 204117_at   | 5.89 | 3.27E-24 |
| EIF1AX   | 201018_at   | 5.89 | 1.14E-16 |
| TMEM19   | 229126_at   | 5.89 | 4.08E-17 |
| ATG13    | 203364_s_at | 5.88 | 1.42E-24 |
| GPR89A   | 220642_x_at | 5.88 | 7.30E-24 |
| TENM2    | 231867_at   | 5.88 | 4.82E-11 |
| CHMP2B   | 202536_at   | 5.88 | 1.45E-08 |
| CENPT    | 218148_at   | 5.88 | 1.93E-38 |
| ZNF580   | 220748_s_at | 5.88 | 5.11E-20 |
| GTDC2    | 225689_at   | 5.88 | 1.37E-23 |
| PMPCA    | 212088_at   | 5.87 | 1.60E-18 |
| ATXN2    | 202622_s_at | 5.87 | 2.54E-27 |
| CCDC93   | 209688_s_at | 5.87 | 3.59E-19 |
| KDM1A    | 212348_s_at | 5.87 | 5.07E-21 |
| CLN5     | 204084_s_at | 5.87 | 9.73E-21 |
| ISG20L2  | 208114_s_at | 5.87 | 3.98E-33 |
| NDNF     | 219747_at   | 5.87 | 6.73E-06 |
| LUC7L2   | 226758_at   | 5.87 | 1.01E-21 |
| MARK3    | 202568_s_at | 5.86 | 6.77E-22 |
| APPL1    | 222538_s_at | 5.86 | 2.89E-21 |
| CAPZA2   | 201237_at   | 5.86 | 2.43E-08 |
| MAP1S    | 218522_s_at | 5.86 | 2.16E-23 |
| ANKRD28  | 226025_at   | 5.86 | 4.80E-11 |
| AKR1A1   | 201900_s_at | 5.86 | 1.85E-18 |
| DPY19L3  | 225633_at   | 5.85 | 8.61E-13 |
| AASDHPPT | 202170_s_at | 5.85 | 1.67E-19 |
| TMEM18   | 225489_at   | 5.85 | 5.10E-20 |
| PFAS     | 213302_at   | 5.85 | 1.07E-20 |
| ACYP2    | 206833_s_at | 5.85 | 4.64E-25 |
| EYA2     | 209692_at   | 5.84 | 1.08E-14 |
| LSM5     | 211747_s_at | 5.84 | 2.88E-15 |
| AP5M1    | 218139_s_at | 5.84 | 3.48E-14 |
| UGGT2    | 218801_at   | 5.84 | 6.72E-21 |

|              |              |      |          |
|--------------|--------------|------|----------|
| BARD1        | 227545_at    | 5.84 | 8.46E-23 |
| AAMP         | 201511_at    | 5.83 | 2.09E-27 |
| C2orf76      | 227840_at    | 5.83 | 2.82E-17 |
| AP3S1        | 202442_at    | 5.83 | 7.28E-17 |
| RBMX         | 225310_at    | 5.83 | 8.13E-15 |
| SNX30        | 226249_at    | 5.83 | 9.05E-14 |
| STT3B        | 224700_at    | 5.83 | 7.62E-15 |
| XPO6         | 211982_x_at  | 5.83 | 2.22E-22 |
| LOC101060511 | 225278_at    | 5.82 | 8.05E-18 |
| TFDP2        | 203588_s_at  | 5.82 | 6.00E-17 |
| POGLUT1      | 218587_s_at  | 5.82 | 1.86E-28 |
| POLDIP2      | 217806_s_at  | 5.82 | 2.06E-24 |
| GORASP1      | 215749_s_at  | 5.81 | 2.14E-28 |
| TAX1BP1      | 200976_s_at  | 5.81 | 1.63E-23 |
| MANF         | 202655_at    | 5.81 | 1.14E-17 |
| CREB3L1      | 213059_at    | 5.81 | 8.53E-21 |
| TRIM22       | 213293_s_at  | 5.81 | 3.93E-14 |
| PURB         | 225120_at    | 5.81 | 1.56E-17 |
| CCPG1        | 221511_x_at  | 5.80 | 1.82E-11 |
| TMEM199      | 225375_at    | 5.80 | 1.19E-26 |
| IFT46        | 218483_s_at  | 5.80 | 1.29E-28 |
| RPS4X        | 200933_x_at  | 5.80 | 5.39E-18 |
| TMBIM4       | 223892_s_at  | 5.80 | 1.49E-21 |
| ND2          | 1553551_s_at | 5.80 | 2.54E-09 |
| ZNF12        | 1559881_s_at | 5.79 | 1.14E-43 |
| ZNF638       | 213775_x_at  | 5.79 | 3.26E-15 |
| OSBPL3       | 209627_s_at  | 5.79 | 7.14E-25 |
| HIATL1       | 223073_at    | 5.79 | 9.23E-17 |
| UFSP2        | 218449_at    | 5.79 | 2.15E-15 |
| NDST1        | 1554010_at   | 5.78 | 8.36E-35 |
| MAPK9        | 203218_at    | 5.78 | 2.26E-16 |
| STK38L       | 212572_at    | 5.78 | 1.72E-09 |
| RNF114       | 200867_at    | 5.78 | 2.08E-20 |
| RPS27A       | 200017_at    | 5.78 | 5.12E-18 |
| GMFB         | 202544_at    | 5.78 | 9.49E-14 |
| SMARCE1      | 211989_at    | 5.77 | 2.63E-19 |
| DHRS3        | 202481_at    | 5.77 | 2.02E-12 |
| RRP15        | 219037_at    | 5.77 | 4.50E-13 |
| CDC42        | 208727_s_at  | 5.77 | 8.71E-17 |
| SIN3A        | 225135_at    | 5.77 | 3.91E-25 |
| KDELC1       | 219479_at    | 5.76 | 4.93E-16 |

|              |             |      |            |
|--------------|-------------|------|------------|
| SF3A2        | 37462_i_at  | 5.76 | 2.85E-17   |
| STAT6        | 201331_s_at | 5.75 | 1.21E-19   |
| PARN         | 203905_at   | 5.75 | 5.07E-17   |
| DAZAP2       | 200794_x_at | 5.75 | 4.11E-22   |
| ECT2         | 219787_s_at | 5.74 | 9.47E-10   |
| MLF1IP       | 218883_s_at | 5.74 | 6.78E-12   |
| C14orf28     | 238647_at   | 5.74 | 2.69E-15   |
| PJA1         | 218667_at   | 5.74 | 3.28E-19   |
| UBE2W        | 222657_s_at | 5.74 | 2.81E-11   |
| CENPW        | 226936_at   | 5.73 | 1.19E-16   |
| GTF2IRD2     | 228765_at   | 5.73 | 1.06E-18   |
| SH3GL1       | 201851_at   | 5.73 | 2.88E-28   |
| SPAG7        | 200053_at   | 5.73 | 4.15E-24   |
| PLOD1        | 200827_at   | 5.73 | 1.19E-17   |
| MRPL55       | 225719_s_at | 5.73 | 6.08E-22   |
| CBY1         | 203450_at   | 5.73 | 9.67E-21   |
| PIK3C3       | 204297_at   | 5.72 | 2.94E-20   |
| PLEC         | 201373_at   | 5.72 | 1.51E-22   |
| DDX17        | 208719_s_at | 5.72 | 7.84E-32   |
| ARHGEF10     | 216620_s_at | 5.72 | 1.45E-24   |
| KEAP1        | 202417_at   | 5.72 | 2.95E-26   |
| PLAUR        | 211924_s_at | 5.72 | 3.42E-19   |
| TSPYL4       | 212928_at   | 5.72 | 7.09E-18   |
| PARP4        | 202239_at   | 5.72 | 1.06E-21   |
| ATL1         | 223340_at   | 5.72 | 7.16E-14   |
| LPCAT1       | 201818_at   | 5.71 | 2.05E-19   |
| LOC101060460 | 209382_at   | 5.71 | 2.97E-27   |
| RHBDD2       | 222995_s_at | 5.71 | 8.13E-15   |
| OIP5         | 213599_at   | 5.71 | 2.13E-30   |
| METTL13      | 212407_at   | 5.71 | 4.45E-18   |
| LONP2        | 223099_s_at | 5.71 | 1.24E-18   |
| SLC2A3       | 202498_s_at | 5.70 | 5.54E-26   |
| CEBPB        | 212501_at   | 5.70 | 2.19E-12   |
| PGGT1B       | 206288_at   | 5.70 | < 2.90E-44 |
| ZFR          | 201857_at   | 5.70 | 8.50E-16   |
| RAB27A       | 210951_x_at | 5.70 | 9.58E-16   |
| SNAP29       | 218327_s_at | 5.70 | 5.50E-23   |
| ASS1         | 207076_s_at | 5.70 | 2.07E-14   |
| RNF41        | 201961_s_at | 5.70 | 8.91E-23   |
| ZNF655       | 225945_at   | 5.70 | 1.13E-14   |
| TMEM160      | 219219_at   | 5.70 | 6.34E-24   |

|              |              |      |            |
|--------------|--------------|------|------------|
| TRNT1        | 1552625_a_at | 5.69 | < 2.90E-44 |
| ARSA         | 204443_at    | 5.69 | 3.13E-32   |
| ZFP82        | 1555793_a_at | 5.69 | 1.91E-22   |
| TEAD4        | 41037_at     | 5.69 | 1.01E-28   |
| OARD1        | 213322_at    | 5.69 | 8.43E-13   |
| DDX50        | 221699_s_at  | 5.69 | 3.21E-19   |
| NFE2L1       | 200758_s_at  | 5.68 | 6.03E-25   |
| ZFAND2B      | 226168_at    | 5.68 | 4.57E-22   |
| MTCH1        | 221619_s_at  | 5.68 | 1.42E-19   |
| TMEM243      | 204215_at    | 5.68 | 1.01E-17   |
| ALDH4A1      | 203722_at    | 5.68 | 2.84E-29   |
| LOC100507165 | 236640_at    | 5.67 | 3.21E-18   |
| CTB-193M12.5 | 227249_at    | 5.67 | 1.24E-15   |
| MIEN1        | 224447_s_at  | 5.67 | 3.20E-18   |
| FBXO28       | 202272_s_at  | 5.67 | 9.69E-20   |
| ZNF585B      | 1557302_at   | 5.66 | 2.30E-29   |
| DDX18        | 208895_s_at  | 5.66 | 2.02E-23   |
| MRTO4        | 220688_s_at  | 5.66 | 7.36E-23   |
| NBN          | 202907_s_at  | 5.66 | 1.08E-15   |
| BCAS2        | 203053_at    | 5.66 | 6.12E-14   |
| HAGH         | 205012_s_at  | 5.66 | 7.85E-21   |
| RHNO1        | 225837_at    | 5.65 | 1.60E-21   |
| LOC101060412 | 214870_x_at  | 5.65 | 1.43E-15   |
| AP4M1        | 209837_at    | 5.65 | 9.90E-28   |
| RNF113A      | 209565_at    | 5.64 | 1.17E-18   |
| ADAMTS6      | 237411_at    | 5.64 | 1.18E-11   |
| CYGB         | 226632_at    | 5.64 | 2.94E-13   |
| PDCD10       | 210907_s_at  | 5.64 | 1.99E-11   |
| CPQ          | 208454_s_at  | 5.63 | 7.30E-24   |
| GADD45B      | 209305_s_at  | 5.63 | 2.98E-10   |
| WDR34        | 224715_at    | 5.63 | 8.41E-16   |
| CKLF         | 223451_s_at  | 5.63 | 1.53E-18   |
| CLIP2        | 211031_s_at  | 5.63 | 4.96E-26   |
| TBC1D2B      | 212796_s_at  | 5.63 | 1.75E-23   |
| TNPO3        | 214550_s_at  | 5.63 | 3.88E-27   |
| ABHD16A      | 224756_s_at  | 5.63 | 1.36E-23   |
| SCAMP1       | 1552978_a_at | 5.62 | < 2.90E-44 |
| ETFB         | 202942_at    | 5.62 | 2.03E-18   |
| BOD1         | 225030_at    | 5.62 | 3.02E-21   |
| ZNF667-AS1   | 244741_s_at  | 5.62 | 1.93E-14   |
| NDUFA9       | 208969_at    | 5.61 | 2.10E-20   |



|           |              |      |          |
|-----------|--------------|------|----------|
| AHNAK     | 211986_at    | 5.61 | 8.75E-18 |
| TEX261    | 212083_at    | 5.61 | 3.91E-18 |
| CASP6     | 209790_s_at  | 5.61 | 6.42E-17 |
| UTP14A    | 221514_at    | 5.60 | 7.28E-22 |
| FARSA     | 216602_s_at  | 5.60 | 7.05E-39 |
| RPP30     | 203436_at    | 5.59 | 1.14E-22 |
| UBB       | 200633_at    | 5.59 | 2.23E-15 |
| KRTAP2-3  | 1555673_at   | 5.59 | 2.04E-27 |
| MAP4      | 212566_at    | 5.59 | 6.12E-20 |
| IGF2      | 202409_at    | 5.59 | 5.91E-06 |
| SUDS3     | 233841_s_at  | 5.58 | 1.40E-21 |
| ASAP3     | 219103_at    | 5.58 | 1.56E-28 |
| MME       | 203434_s_at  | 5.58 | 2.87E-07 |
| MCU       | 225320_at    | 5.58 | 1.58E-27 |
| GDF5      | 206614_at    | 5.58 | 2.88E-35 |
| VAT1      | 208626_s_at  | 5.58 | 9.23E-24 |
| FGFR1OP2  | 1556283_s_at | 5.57 | 1.89E-12 |
| KLHL9     | 213233_s_at  | 5.57 | 2.52E-19 |
| RCOR1     | 212612_at    | 5.57 | 6.80E-16 |
| RBBP7     | 201092_at    | 5.57 | 2.37E-15 |
| KHNYN     | 212355_at    | 5.57 | 1.60E-20 |
| DCAF6     | 217908_s_at  | 5.56 | 4.42E-16 |
| COX7A1    | 204570_at    | 5.56 | 3.38E-12 |
| KDM4B     | 212492_s_at  | 5.56 | 2.00E-12 |
| CPEB1     | 219578_s_at  | 5.56 | 1.31E-28 |
| KIF11     | 204444_at    | 5.56 | 1.88E-12 |
| NDUFB5    | 203621_at    | 5.56 | 1.19E-14 |
| C19orf12  | 225863_s_at  | 5.56 | 1.93E-21 |
| EIF4ENIF1 | 218626_at    | 5.55 | 7.36E-21 |
| ANXA2P2   | 208816_x_at  | 5.55 | 2.96E-14 |
| DHX40     | 222574_s_at  | 5.55 | 2.30E-20 |
| GEMIN2    | 211115_x_at  | 5.55 | 6.78E-23 |
| TMEM129   | 225588_s_at  | 5.55 | 8.29E-19 |
| DOK5      | 214844_s_at  | 5.55 | 1.91E-10 |
| ADM       | 202912_at    | 5.55 | 2.67E-07 |
| TMEM42    | 226361_at    | 5.54 | 3.40E-24 |
| GPATCH2L  | 235302_at    | 5.54 | 4.27E-40 |
| SH3BP5    | 201810_s_at  | 5.54 | 3.90E-18 |
| SMS       | 202043_s_at  | 5.54 | 7.69E-12 |
| TXNL1     | 201588_at    | 5.54 | 2.31E-14 |
| GNPTG     | 224887_at    | 5.54 | 1.88E-20 |

|              |             |      |            |
|--------------|-------------|------|------------|
| MED7         | 204350_s_at | 5.53 | 1.77E-32   |
| ACVR1        | 203935_at   | 5.53 | 1.37E-13   |
| G3BP2        | 208840_s_at | 5.53 | 1.45E-23   |
| CACUL1       | 227257_s_at | 5.53 | < 2.90E-44 |
| ZNF827       | 226764_at   | 5.53 | 1.20E-14   |
| LOC100508408 | 200018_at   | 5.53 | 1.46E-16   |
| ZADH2        | 227978_s_at | 5.53 | 2.57E-40   |
| NUDT1        | 204766_s_at | 5.53 | 2.19E-20   |
| GSS          | 201415_at   | 5.53 | 1.11E-18   |
| COQ4         | 218328_at   | 5.53 | 2.30E-26   |
| RERE         | 200940_s_at | 5.53 | 3.22E-19   |
| RSBN1L-AS1   | 227431_at   | 5.52 | 1.03E-24   |
| SCYL2        | 224960_at   | 5.52 | 4.60E-14   |
| TBC1D20      | 226409_at   | 5.52 | 1.43E-22   |
| CYCS         | 208905_at   | 5.52 | 2.56E-17   |
| SMIM20       | 225014_at   | 5.52 | 5.35E-15   |
| TSPAN31      | 203226_s_at | 5.52 | 9.09E-37   |
| DSCR3        | 203635_at   | 5.52 | 2.10E-26   |
| NT5DC1       | 223177_at   | 5.52 | 8.79E-17   |
| MND1         | 223700_at   | 5.52 | 3.16E-39   |
| CEP76        | 219311_at   | 5.52 | 1.66E-26   |
| MSANTD4      | 227418_at   | 5.52 | 2.72E-11   |
| TUBGCP4      | 211337_s_at | 5.52 | 1.19E-38   |
| ANKRD37      | 227337_at   | 5.52 | 3.48E-11   |
| DVL1         | 203230_at   | 5.52 | 1.60E-21   |
| ECM1         | 209365_s_at | 5.51 | 1.81E-07   |
| CSNK2A1      | 212075_s_at | 5.51 | 1.66E-20   |
| ZAK          | 223519_at   | 5.51 | 4.32E-12   |
| KTI12        | 225642_at   | 5.51 | 7.02E-33   |
| NDUFA7       | 202785_at   | 5.50 | 1.16E-23   |
| PPM1G        | 200913_at   | 5.50 | 3.62E-18   |
| PSME1        | 200814_at   | 5.50 | 5.00E-21   |
| FAM50B       | 205775_at   | 5.50 | 1.75E-24   |
| AIMP1        | 202542_s_at | 5.49 | 6.55E-21   |
| VPS41        | 210849_s_at | 5.49 | 3.22E-17   |
| SPTAN1       | 208611_s_at | 5.49 | 5.24E-17   |
| MRPS7        | 217932_at   | 5.49 | 4.41E-20   |
| PBX3         | 204082_at   | 5.49 | 1.09E-14   |
| SUPT5H       | 201480_s_at | 5.49 | 3.80E-28   |
| RPS23        | 200926_at   | 5.49 | 1.11E-16   |
| MFSD11       | 223242_s_at | 5.49 | 1.37E-26   |

|         |              |      |            |
|---------|--------------|------|------------|
| SRRT    | 201680_x_at  | 5.49 | 5.50E-19   |
| RPL32   | 200674_s_at  | 5.48 | 3.48E-17   |
| SMUG1   | 218685_s_at  | 5.48 | 5.88E-30   |
| NIPAL3  | 225876_at    | 5.48 | 1.77E-18   |
| ZFYVE20 | 226581_at    | 5.48 | 3.23E-21   |
| MYLK    | 202555_s_at  | 5.48 | 4.91E-14   |
| HSD3B7  | 222817_at    | 5.48 | 2.52E-23   |
| CWC27   | 1555495_a_at | 5.48 | 5.46E-11   |
| SCAF11  | 206989_s_at  | 5.47 | 9.79E-16   |
| NAAA    | 227135_at    | 5.47 | 1.72E-10   |
| TMED1   | 203679_at    | 5.47 | 5.11E-20   |
| VPS51   | 217969_at    | 5.47 | 1.25E-17   |
| MAT2B   | 217993_s_at  | 5.47 | 7.13E-11   |
| COX5A   | 203663_s_at  | 5.47 | 2.44E-17   |
| TLK2    | 212986_s_at  | 5.46 | 2.08E-26   |
| AUTS2   | 212599_at    | 5.46 | 1.30E-16   |
| NCOA5   | 225145_at    | 5.46 | 2.23E-26   |
| SLC30A9 | 202614_at    | 5.46 | 1.93E-14   |
| SBF1    | 212393_at    | 5.46 | 4.12E-42   |
| ERBB2   | 216836_s_at  | 5.46 | 1.02E-20   |
| TLE3    | 206472_s_at  | 5.46 | 1.35E-38   |
| NUP98   | 210793_s_at  | 5.45 | 7.74E-24   |
| YWHAG   | 222985_at    | 5.45 | 3.24E-19   |
| NUP155  | 206550_s_at  | 5.44 | 4.56E-22   |
| DNAJC16 | 212908_at    | 5.44 | 1.07E-19   |
| TFCP2   | 209338_at    | 5.44 | 1.34E-21   |
| MAGI1   | 225474_at    | 5.44 | 2.98E-28   |
| TM9SF4  | 212194_s_at  | 5.44 | 2.68E-22   |
| CARM1   | 212512_s_at  | 5.44 | 2.22E-22   |
| RNF146  | 221430_s_at  | 5.43 | < 2.90E-44 |
| CBR3    | 205379_at    | 5.43 | 5.17E-16   |
| MLH1    | 202520_s_at  | 5.43 | 3.92E-19   |
| FAM193A | 203600_s_at  | 5.43 | 9.37E-18   |
| BTBD10  | 223174_at    | 5.42 | 2.18E-16   |
| C9orf3  | 212848_s_at  | 5.42 | 1.19E-18   |
| GTF2H2  | 223758_s_at  | 5.42 | 1.42E-34   |
| MRPL1   | 223154_at    | 5.42 | 2.33E-25   |
| RPAP3   | 218842_at    | 5.42 | 2.09E-21   |
| AP4E1   | 228164_at    | 5.42 | 4.91E-24   |
| TTC8    | 226120_at    | 5.42 | 2.30E-13   |
| UNC119B | 202365_at    | 5.42 | 5.52E-19   |

|          |              |      |            |
|----------|--------------|------|------------|
| PKIG     | 202732_at    | 5.42 | 6.62E-18   |
| TIAL1    | 202406_s_at  | 5.42 | 2.16E-17   |
| EXOC6B   | 225900_at    | 5.42 | 5.78E-40   |
| MORC2    | 216863_s_at  | 5.41 | 1.39E-26   |
| PIP4K2A  | 212829_at    | 5.41 | 1.22E-12   |
| METAP1   | 212673_at    | 5.41 | 1.00E-20   |
| ARHGEF18 | 213039_at    | 5.41 | 5.87E-21   |
| GGCT     | 215380_s_at  | 5.41 | 2.49E-18   |
| FLAD1    | 205661_s_at  | 5.41 | 2.57E-33   |
| CUTC     | 218970_s_at  | 5.41 | 4.96E-29   |
| PRPF3    | 202251_at    | 5.41 | 1.68E-18   |
| AIFM1    | 205512_s_at  | 5.40 | 5.28E-20   |
| XPO1     | 208775_at    | 5.40 | 2.28E-16   |
| FNBP1    | 212288_at    | 5.40 | 2.37E-18   |
| TP53TG1  | 209917_s_at  | 5.40 | 8.87E-23   |
| SF3A3    | 203818_s_at  | 5.40 | 5.00E-22   |
| DCAF17   | 231921_at    | 5.39 | < 2.90E-44 |
| SEC22C   | 225460_at    | 5.39 | 2.99E-12   |
| RNF4     | 212696_s_at  | 5.39 | 8.64E-20   |
| NKTR     | 215338_s_at  | 5.39 | 1.05E-07   |
| SNAPC5   | 1554093_a_at | 5.39 | 5.37E-24   |
| PHAX     | 231812_x_at  | 5.39 | 1.69E-41   |
| C3orf62  | 202681_at    | 5.39 | 6.04E-28   |
| BDH2     | 218285_s_at  | 5.39 | 1.50E-17   |
| EI24     | 216396_s_at  | 5.39 | 8.90E-23   |
| VANGL1   | 219330_at    | 5.39 | 3.72E-26   |
| IRGQ     | 1555833_a_at | 5.39 | 9.86E-24   |
| TXNDC12  | 223017_at    | 5.39 | 9.60E-19   |
| NAGLU    | 204360_s_at  | 5.38 | 3.21E-21   |
| GMPS     | 214431_at    | 5.38 | 2.23E-18   |
| WBP5     | 217975_at    | 5.38 | 7.40E-12   |
| CSTF1    | 202190_at    | 5.38 | 1.75E-26   |
| AAMDC    | 221600_s_at  | 5.38 | 1.72E-30   |
| ITM2C    | 221004_s_at  | 5.38 | 1.20E-16   |
| CIZ1     | 213977_s_at  | 5.38 | 8.47E-26   |
| FBXO8    | 1554806_a_at | 5.38 | 1.25E-11   |
| GPS2     | 209350_s_at  | 5.38 | 3.77E-23   |
| QTRT1    | 221270_s_at  | 5.37 | 1.34E-15   |
| CMAS     | 218111_s_at  | 5.37 | 1.19E-21   |
| COMMD7   | 224815_at    | 5.37 | 3.55E-22   |
| CDV3     | 212010_s_at  | 5.37 | 7.91E-17   |

|           |              |      |            |
|-----------|--------------|------|------------|
| HCFC2     | 219484_at    | 5.37 | 2.23E-27   |
| SGSH      | 35626_at     | 5.37 | 1.93E-17   |
| C14orf132 | 231859_at    | 5.37 | 1.73E-28   |
| CSNK1D    | 208774_at    | 5.37 | 3.84E-19   |
| SORT1     | 224818_at    | 5.37 | 3.15E-15   |
| GOLPH3L   | 218361_at    | 5.36 | 7.68E-20   |
| MRPL11    | 219162_s_at  | 5.36 | 6.63E-18   |
| GDF11     | 216860_s_at  | 5.36 | 4.29E-34   |
| HDAC2     | 201833_at    | 5.36 | 4.04E-19   |
| MPHOSPH10 | 212885_at    | 5.35 | 1.29E-19   |
| HNRNPH1   | 213470_s_at  | 5.35 | < 2.90E-44 |
| SNAPIN    | 223066_at    | 5.35 | 1.19E-22   |
| PMM2      | 203201_at    | 5.35 | 7.59E-19   |
| GOLGA1    | 203384_s_at  | 5.35 | 6.46E-31   |
| PLXNB2    | 208890_s_at  | 5.34 | 6.66E-19   |
| PARP2     | 214086_s_at  | 5.34 | 5.86E-23   |
| OXCT1     | 202780_at    | 5.34 | 9.19E-13   |
| NPIPA2    | 221501_x_at  | 5.34 | 2.74E-15   |
| CYB5D1    | 226833_at    | 5.34 | 1.16E-21   |
| HAUS7     | 213334_x_at  | 5.34 | 5.21E-16   |
| STRADB    | 223266_at    | 5.34 | 1.63E-21   |
| C11orf95  | 218641_at    | 5.34 | 1.43E-17   |
| LINC00662 | 235191_at    | 5.34 | 2.72E-41   |
| PANK4     | 218771_at    | 5.33 | 1.11E-21   |
| PROSER1   | 225887_at    | 5.33 | 9.98E-19   |
| MIR4680   | 202731_at    | 5.33 | 1.51E-16   |
| TPRKB     | 219030_at    | 5.32 | 1.07E-16   |
| CYB5D2    | 225804_at    | 5.32 | 7.89E-26   |
| TMEM158   | 213338_at    | 5.32 | 1.85E-05   |
| ATL2      | 222700_at    | 5.32 | 1.28E-16   |
| RPL38     | 202029_x_at  | 5.32 | 1.40E-17   |
| CHMP5     | 219356_s_at  | 5.32 | 8.41E-14   |
| FGF5      | 210310_s_at  | 5.32 | 6.52E-39   |
| NSMAF     | 232149_s_at  | 5.32 | 2.22E-26   |
| C7orf60   | 228149_at    | 5.31 | 3.01E-13   |
| C9orf69   | 224962_at    | 5.31 | 4.06E-23   |
| TNIP1     | 207196_s_at  | 5.31 | 1.80E-20   |
| MIR31HG   | 1554097_a_at | 5.31 | 1.32E-30   |
| MPDZ      | 205079_s_at  | 5.31 | 2.00E-23   |
| BCL7B     | 202518_at    | 5.31 | 1.01E-23   |
| C4orf46   | 201812_s_at  | 5.31 | 3.21E-16   |

|              |             |      |          |
|--------------|-------------|------|----------|
| TRIP11       | 209778_at   | 5.30 | 3.45E-23 |
| NPM3         | 205129_at   | 5.30 | 1.49E-27 |
| DPH3P1       | 204849_at   | 5.30 | 4.30E-13 |
| TOM1         | 202807_s_at | 5.30 | 7.97E-25 |
| MRPS22       | 219220_x_at | 5.30 | 1.13E-22 |
| ABHD17A      | 221267_s_at | 5.30 | 1.30E-15 |
| NUP88        | 202900_s_at | 5.29 | 2.72E-17 |
| PNPLA6       | 203718_at   | 5.29 | 3.76E-22 |
| IP6K2        | 223165_s_at | 5.29 | 7.13E-10 |
| SLC38A7      | 218727_at   | 5.29 | 3.01E-24 |
| NAP1L3       | 204749_at   | 5.29 | 6.02E-08 |
| FEM1C        | 213341_at   | 5.29 | 2.42E-20 |
| ADNP2        | 203322_at   | 5.29 | 3.54E-20 |
| ZFAND5       | 210275_s_at | 5.29 | 1.84E-19 |
| AARS         | 201000_at   | 5.29 | 1.01E-18 |
| LMNB1        | 203276_at   | 5.29 | 1.29E-24 |
| KDELC2       | 225128_at   | 5.28 | 1.56E-16 |
| SLC25A15     | 218653_at   | 5.28 | 1.67E-30 |
| STK16        | 209622_at   | 5.27 | 6.23E-36 |
| DDX47        | 220890_s_at | 5.27 | 2.29E-21 |
| TRIQQ        | 225600_at   | 5.27 | 2.23E-24 |
| AP3B1        | 203142_s_at | 5.27 | 4.20E-26 |
| DHTKD1       | 227094_at   | 5.27 | 9.84E-19 |
| TBL1X        | 201867_s_at | 5.27 | 3.56E-17 |
| TDRD7        | 213361_at   | 5.27 | 1.64E-23 |
| CCS          | 203522_at   | 5.27 | 4.28E-17 |
| TP53INP2     | 224836_at   | 5.27 | 1.77E-21 |
| TRA2A        | 204658_at   | 5.26 | 2.49E-19 |
| NUDT11       | 219855_at   | 5.26 | 1.26E-16 |
| GAS5         | 224841_x_at | 5.26 | 2.47E-09 |
| GPN2         | 218799_at   | 5.26 | 1.83E-25 |
| RHBDF1       | 218686_s_at | 5.26 | 1.23E-23 |
| CDO1         | 204154_at   | 5.26 | 2.16E-07 |
| GM2A         | 212737_at   | 5.26 | 2.98E-17 |
| LOC100506710 | 225635_s_at | 5.25 | 4.46E-23 |
| KCTD11       | 235857_at   | 5.25 | 1.53E-20 |
| MR1          | 210223_s_at | 5.25 | 2.80E-25 |
| SMC2         | 204240_s_at | 5.25 | 3.04E-15 |
| ABHD5        | 218739_at   | 5.25 | 2.46E-34 |
| RBM10        | 208984_x_at | 5.25 | 2.63E-18 |
| DENND1A      | 219763_at   | 5.25 | 1.88E-32 |

|          |              |      |          |
|----------|--------------|------|----------|
| HNRNPA1  | 214280_x_at  | 5.25 | 8.41E-15 |
| CTR9     | 202060_at    | 5.25 | 1.50E-17 |
| PRKACB   | 202741_at    | 5.25 | 1.36E-11 |
| ATF1     | 1565269_s_at | 5.25 | 4.05E-41 |
| TIPRL    | 1554351_a_at | 5.24 | 2.19E-43 |
| TMEM184B | 202027_at    | 5.24 | 3.01E-19 |
| GPAA1    | 215690_x_at  | 5.24 | 2.30E-21 |
| RPL7     | 212042_x_at  | 5.24 | 1.56E-16 |
| TBC1D5   | 201813_s_at  | 5.23 | 1.23E-23 |
| TFE3     | 212457_at    | 5.23 | 3.10E-19 |
| ANAPC15  | 204218_at    | 5.23 | 3.38E-23 |
| NOL9     | 1554082_a_at | 5.23 | 2.90E-30 |
| CERS6    | 212442_s_at  | 5.23 | 3.62E-17 |
| POLR2D   | 203664_s_at  | 5.23 | 5.92E-32 |
| NDUFAF5  | 222894_x_at  | 5.23 | 1.96E-29 |
| RPSA     | 213801_x_at  | 5.22 | 1.09E-18 |
| CLCC1    | 1555543_a_at | 5.22 | 4.36E-37 |
| PDE5A    | 227088_at    | 5.22 | 2.00E-08 |
| PIGO     | 209998_at    | 5.22 | 1.71E-24 |
| FBLIM1   | 1554795_a_at | 5.22 | 5.78E-16 |
| SDSL     | 228274_at    | 5.22 | 4.46E-27 |
| FBXL4    | 209943_at    | 5.22 | 2.45E-21 |
| IRS1     | 204686_at    | 5.21 | 1.49E-09 |
| NDUFAF3  | 209177_at    | 5.21 | 4.34E-22 |
| NOB1     | 223018_at    | 5.21 | 7.20E-16 |
| TBCEL    | 227395_at    | 5.21 | 3.18E-19 |
| DCAF7    | 221744_at    | 5.21 | 2.90E-44 |
| GOT1     | 208813_at    | 5.21 | 3.37E-21 |
| PDE8A    | 212522_at    | 5.21 | 3.70E-13 |
| FAM172A  | 212936_at    | 5.21 | 4.07E-14 |
| BTBD7    | 224943_at    | 5.21 | 1.26E-23 |
| PNO1     | 203622_s_at  | 5.21 | 5.86E-21 |
| PPP2R5D  | 211159_s_at  | 5.21 | 2.34E-34 |
| ACTA2    | 200974_at    | 5.21 | 3.04E-12 |
| FAM216A  | 204521_at    | 5.21 | 2.19E-19 |
| ELMOD2   | 1553928_at   | 5.21 | 4.08E-14 |
| MYO6     | 203215_s_at  | 5.21 | 2.53E-12 |
| DET1     | 219641_at    | 5.20 | 1.35E-23 |
| CEBPD    | 213006_at    | 5.20 | 9.73E-25 |
| NUDT2    | 218609_s_at  | 5.20 | 9.64E-25 |
| SLC25A33 | 223296_at    | 5.20 | 8.09E-14 |

|              |             |      |          |
|--------------|-------------|------|----------|
| SLC35A3      | 226894_at   | 5.20 | 2.19E-16 |
| ADAT1        | 219384_s_at | 5.19 | 4.46E-25 |
| TLCD1        | 227804_at   | 5.19 | 1.98E-26 |
| C2orf47      | 219176_at   | 5.19 | 3.63E-20 |
| TMED9        | 208757_at   | 5.19 | 2.46E-21 |
| C17orf89     | 225967_s_at | 5.19 | 2.02E-18 |
| GAPVD1       | 214869_x_at | 5.19 | 1.08E-33 |
| TRAM2-AS1    | 227298_at   | 5.19 | 1.35E-25 |
| KRTCAP2      | 224885_s_at | 5.18 | 3.69E-17 |
| MOGS         | 210627_s_at | 5.18 | 1.09E-20 |
| ATOH8        | 228890_at   | 5.18 | 7.75E-25 |
| ISCA1        | 209274_s_at | 5.18 | 5.76E-15 |
| LOC645638    | 229566_at   | 5.18 | 1.22E-34 |
| XRCC4        | 205071_x_at | 5.18 | 3.17E-27 |
| ASXL1        | 244519_at   | 5.18 | 1.26E-24 |
| ZCCHC9       | 225538_at   | 5.18 | 4.89E-16 |
| TMX4         | 201580_s_at | 5.18 | 5.48E-23 |
| LCMT1        | 221515_s_at | 5.18 | 8.05E-21 |
| GNB4         | 225710_at   | 5.18 | 6.65E-10 |
| IFT20        | 210312_s_at | 5.18 | 3.41E-19 |
| BTF3L4       | 225976_at   | 5.18 | 1.57E-12 |
| BTBD19       | 1557049_at  | 5.17 | 4.53E-23 |
| LOC100505806 | 227655_at   | 5.17 | 4.23E-15 |
| GIN1         | 219467_at   | 5.17 | 4.67E-14 |
| ABCF3        | 202394_s_at | 5.17 | 1.34E-25 |
| SMIM13       | 227124_at   | 5.17 | 3.80E-16 |
| KDM2B        | 226215_s_at | 5.16 | 2.31E-23 |
| NFYC         | 202216_x_at | 5.16 | 7.32E-38 |
| SKA2         | 225684_at   | 5.15 | 2.85E-15 |
| DRAM1        | 218627_at   | 5.15 | 8.12E-17 |
| PTPMT1       | 225901_at   | 5.15 | 5.38E-27 |
| CSTF3        | 203947_at   | 5.15 | 9.85E-20 |
| PTCD3        | 217895_at   | 5.15 | 2.02E-19 |
| C12orf29     | 228378_at   | 5.15 | 6.05E-31 |
| NUDT9        | 218375_at   | 5.15 | 8.22E-18 |
| FAM127B      | 217948_at   | 5.15 | 2.59E-29 |
| ITGA8        | 214265_at   | 5.15 | 2.00E-18 |
| EVL          | 217838_s_at | 5.15 | 1.90E-19 |
| PSMG3        | 223363_at   | 5.15 | 1.71E-21 |
| SULF2        | 233555_s_at | 5.15 | 1.70E-14 |
| TRIM13       | 203659_s_at | 5.15 | 5.93E-20 |



|              |              |      |            |
|--------------|--------------|------|------------|
| BBS12        | 229603_at    | 5.14 | 3.93E-17   |
| MAP3K6       | 219278_at    | 5.14 | 1.02E-16   |
| LOC100996752 | 206303_s_at  | 5.14 | 2.00E-36   |
| TMX3         | 225302_at    | 5.14 | 1.04E-12   |
| ZFAND3       | 218020_s_at  | 5.14 | 7.77E-28   |
| EEF2K        | 225545_at    | 5.14 | 7.44E-18   |
| SMC6         | 218781_at    | 5.14 | 3.98E-18   |
| C1orf198     | 223063_at    | 5.14 | 1.67E-13   |
| LOC100996626 | 222406_s_at  | 5.13 | 7.57E-19   |
| GCDH         | 203500_at    | 5.13 | 7.18E-23   |
| KCTD7        | 218310_at    | 5.13 | 2.26E-15   |
| NCDN         | 209556_at    | 5.13 | 4.25E-36   |
| CARS2        | 218153_at    | 5.13 | 2.09E-17   |
| SLC31A1      | 235013_at    | 5.13 | 1.06E-32   |
| NELFB        | 202757_at    | 5.13 | 1.21E-19   |
| CRIP1        | 222702_x_at  | 5.12 | 1.81E-14   |
| GCC2         | 202832_at    | 5.12 | 7.83E-14   |
| SENP6        | 202318_s_at  | 5.12 | 4.76E-18   |
| PCTP         | 218676_s_at  | 5.12 | 7.65E-19   |
| ZNF75A       | 227670_at    | 5.12 | 2.84E-32   |
| CAB39L       | 225915_at    | 5.12 | 1.08E-13   |
| FIGNL1       | 222843_at    | 5.12 | 4.04E-11   |
| CNIH         | 201653_at    | 5.12 | 1.08E-09   |
| SCO2         | 205241_at    | 5.12 | 6.37E-13   |
| DTD2         | 227158_at    | 5.12 | 6.42E-13   |
| SELENBP1     | 214433_s_at  | 5.12 | 1.46E-10   |
| MTMR9        | 213278_at    | 5.12 | 2.54E-13   |
| LUC7L        | 1557067_s_at | 5.11 | 9.60E-35   |
| C6orf1       | 226306_at    | 5.11 | 7.03E-28   |
| USP25        | 220419_s_at  | 5.11 | 5.46E-14   |
| LRP11        | 225060_at    | 5.11 | 1.55E-08   |
| SPATC1L      | 223360_at    | 5.11 | 2.99E-23   |
| ZRANB1       | 225131_at    | 5.11 | 8.37E-24   |
| GID8         | 225376_at    | 5.11 | 1.40E-16   |
| TWF1         | 214007_s_at  | 5.11 | 1.33E-25   |
| WDR7         | 212880_at    | 5.11 | 8.31E-21   |
| RFXANK       | 202758_s_at  | 5.10 | 4.70E-16   |
| SLC38A6      | 214830_at    | 5.10 | 1.64E-13   |
| GABPB1       | 204618_s_at  | 5.10 | 1.27E-19   |
| FAM73A       | 243042_at    | 5.10 | < 2.90E-44 |
| MED25        | 1553993_s_at | 5.10 | 5.86E-17   |

|              |              |      |          |
|--------------|--------------|------|----------|
| NAT14        | 223284_at    | 5.09 | 7.53E-19 |
| PTTG1        | 203554_x_at  | 5.09 | 1.34E-11 |
| NRN1         | 218625_at    | 5.09 | 4.87E-28 |
| FAM89A/      | 226448_at    | 5.09 | 9.85E-15 |
| MRPL45       | 224479_s_at  | 5.09 | 6.02E-26 |
| PPT1         | 200975_at    | 5.08 | 5.20E-14 |
| PPP1R15A     | 37028_at     | 5.08 | 1.39E-19 |
| SLC26A2      | 224959_at    | 5.08 | 5.63E-11 |
| AP3S2        | 202399_s_at  | 5.08 | 4.51E-19 |
| UBTF         | 1558215_s_at | 5.08 | 2.39E-25 |
| WDR36        | 226180_at    | 5.08 | 2.62E-13 |
| PA2G4        | 214794_at    | 5.07 | 7.90E-43 |
| CTNNB1       | 221021_s_at  | 5.07 | 1.08E-20 |
| COG6         | 225769_at    | 5.07 | 2.90E-09 |
| SNORA1       | 221580_s_at  | 5.07 | 5.68E-20 |
| SMIM12       | 225404_at    | 5.07 | 1.99E-21 |
| TRNAU1AP     | 218977_s_at  | 5.07 | 6.17E-32 |
| TCF7L1       | 221016_s_at  | 5.07 | 6.11E-18 |
| TRNP1        | 227862_at    | 5.07 | 2.04E-27 |
| RPS18        | 201049_s_at  | 5.07 | 6.74E-20 |
| ATP6V1F      | 201527_at    | 5.07 | 1.01E-21 |
| NAA10        | 203025_at    | 5.06 | 2.67E-17 |
| MLST8        | 220587_s_at  | 5.06 | 6.23E-23 |
| PDE7B        | 230109_at    | 5.06 | 3.43E-14 |
| ZBTB8A       | 235142_at    | 5.06 | 1.89E-13 |
| GOLGB1       | 201057_s_at  | 5.06 | 9.58E-16 |
| NRXN2        | 209982_s_at  | 5.05 | 1.88E-18 |
| ITGB5        | 214021_x_at  | 5.05 | 1.44E-15 |
| SAFB         | 201748_s_at  | 5.05 | 1.57E-17 |
| FIP1L1       | 221007_s_at  | 5.05 | 3.21E-14 |
| LOC101060455 | 211996_s_at  | 5.05 | 1.22E-04 |
| C19orf60     | 51200_at     | 5.05 | 1.34E-20 |
| ANKRD9       | 230972_at    | 5.04 | 3.20E-16 |
| MFAP1        | 203406_at    | 5.04 | 3.73E-20 |
| COL4A3BP     | 219625_s_at  | 5.04 | 3.78E-13 |
| CHEK1        | 205393_s_at  | 5.04 | 3.34E-34 |
| FAM204A      | 222617_s_at  | 5.04 | 5.71E-22 |
| RGS3         | 203823_at    | 5.04 | 9.28E-16 |
| C16orf62     | 203173_s_at  | 5.04 | 7.58E-29 |
| BCS1L        | 207618_s_at  | 5.03 | 1.09E-20 |
| MCM2         | 202107_s_at  | 5.03 | 2.23E-13 |

|          |              |      |          |
|----------|--------------|------|----------|
| COMMD5   | 223819_x_at  | 5.03 | 1.61E-22 |
| CHST14   | 226314_at    | 5.03 | 7.43E-25 |
| AMMECR1  | 204976_s_at  | 5.03 | 7.18E-10 |
| SUPT7L   | 201837_s_at  | 5.03 | 3.23E-18 |
| SUGT1    | 223329_x_at  | 5.03 | 5.60E-14 |
| NBAS     | 202926_at    | 5.03 | 1.50E-23 |
| NGFRAP1  | 217963_s_at  | 5.03 | 8.79E-15 |
| DHDDS    | 218547_at    | 5.03 | 1.67E-24 |
| KIAA1715 | 225718_at    | 5.03 | 5.51E-29 |
| CTBS     | 218924_s_at  | 5.03 | 7.15E-17 |
| NIPBL    | 207108_s_at  | 5.02 | 1.29E-40 |
| POLD4    | 202996_at    | 5.02 | 3.95E-32 |
| MTMR12   | 225232_at    | 5.02 | 6.37E-13 |
| POLRMT   | 203782_s_at  | 5.02 | 2.35E-15 |
| BYSL     | 203612_at    | 5.01 | 5.14E-19 |
| PUSL1    | 228733_at    | 5.01 | 3.27E-25 |
| BLOC1S4  | 223431_at    | 5.01 | 2.55E-20 |
| LAYN     | 228080_at    | 5.01 | 1.47E-14 |
| BBS7     | 219688_at    | 5.01 | 9.24E-30 |
| SLC39A13 | 1552295_a_at | 5.01 | 3.75E-22 |
| GTF2IRD1 | 218412_s_at  | 5.01 | 1.37E-25 |
| TAMM41   | 226815_at    | 5.01 | 1.40E-36 |
| AAGAB    | 202852_s_at  | 5.00 | 8.38E-16 |
| ANP32B   | 201305_x_at  | 5.00 | 2.56E-13 |

**Downregulated genes (Fold change>5; Two-tailed Moderated t-test with Benjamini-Hochberg multiple testing adjusted P<0.05)**

| Gene symbol  | Probe set ID | Fold change | P-value  |
|--------------|--------------|-------------|----------|
| TCTE3        | 1554400_at   | -51.52      | 2.00E-25 |
| LRRC25       | 1559502_s_at | -22.51      | 2.57E-20 |
| LINC00520    | 1555786_s_at | -18.15      | 7.83E-27 |
| ZNF548       | 1553718_at   | -17.41      | 4.10E-20 |
| ABCB9        | 1555323_at   | -16.81      | 3.84E-32 |
| LOC100133089 | 1558784_at   | -16.68      | 1.51E-26 |
| SPATA24      | 1558641_at   | -14.72      | 4.29E-28 |
| LOC101060557 | 1553657_at   | -14.60      | 1.58E-25 |
| RNGTT        | 211387_x_at  | -14.44      | 3.74E-34 |
| SFTPB        | 213936_x_at  | -11.94      | 1.08E-29 |
| KCNS1        | 207366_at    | -11.61      | 1.08E-27 |
| LINC00491    | 1564281_at   | -11.43      | 3.85E-29 |
| SLAMF6       | 1552497_a_at | -11.22      | 2.69E-33 |

|                    |              |        |          |
|--------------------|--------------|--------|----------|
| OTTHUMG00000035180 | 1561044_at   | -11.13 | 2.41E-22 |
| SAMD15             | 1557680_at   | -10.64 | 1.20E-14 |
| MPV17L             | 1559167_x_at | -9.93  | 4.99E-30 |
| GNAO1              | 204763_s_at  | -9.72  | 2.89E-25 |
| ACACB              | 1552615_at   | -9.39  | 1.29E-27 |
| GOLGA6L1           | 1561171_a_at | -9.18  | 1.21E-27 |
| HIF3A              | 222124_at    | -9.15  | 2.88E-20 |
| KLC3               | 1552749_a_at | -9.11  | 1.47E-32 |
| SYT15              | 1560878_at   | -8.82  | 3.92E-19 |
| ZNF236             | 47571_at     | -8.62  | 1.06E-19 |
| G3BP1              | 222187_x_at  | -8.61  | 3.64E-29 |
| OTTHUMG00000175500 | 233116_at    | -8.53  | 6.00E-19 |
| TCP11L2            | 1569206_at   | -8.53  | 1.75E-12 |
| PLAC4              | 214750_at    | -8.30  | 1.42E-30 |
| ASB12              | 236033_at    | -8.25  | 7.26E-18 |
| ADRBK1             | 38447_at     | -8.13  | 2.80E-33 |
| BTNL8              | 220421_at    | -8.11  | 1.54E-21 |
| BEST1              | 1554442_at   | -7.91  | 4.70E-21 |
| GLP1R              | 208390_s_at  | -7.89  | 1.79E-29 |
| MCF2L              | 1563808_at   | -7.54  | 1.41E-16 |
| OR7E104P           | 1566956_at   | -7.43  | 3.90E-28 |
| OTTHUMG00000169306 | 228691_at    | -7.31  | 8.71E-22 |
| OTTHUMG00000020566 | 237345_at    | -7.23  | 1.48E-20 |
| PNPLA2             | 39854_r_at   | -7.17  | 7.38E-32 |
| C14orf159          | 1554039_at   | -7.12  | 5.87E-29 |
| SERPINB6           | 231628_s_at  | -7.05  | 2.67E-08 |
| LOC100505478       | 231203_at    | -6.96  | 2.79E-23 |
| AC093162.5         | 1566471_at   | -6.92  | 3.08E-21 |
| NKX1-1             | 1565537_at   | -6.89  | 7.16E-19 |
| WHAMMP2            | 1557450_s_at | -6.88  | 2.75E-22 |
| LOC100129098       | 1569361_a_at | -6.74  | 3.78E-27 |
| CYP19A1            | 239459_s_at  | -6.68  | 1.13E-12 |
| SYN1               | 1553264_a_at | -6.57  | 3.89E-21 |
| MAP3K19            | 221180_at    | -6.56  | 2.08E-27 |
| OTTHUMG00000177665 | 1558275_at   | -6.46  | 7.05E-24 |
| RBMY3AP            | 1565320_at   | -6.44  | 3.95E-12 |
| RAB6B              | 221792_at    | -6.37  | 2.80E-33 |
| MESP1              | 229195_at    | -6.36  | 1.35E-25 |
| SMPDL3B            | 1554050_at   | -6.36  | 7.46E-30 |
| LOC541473          | 1554318_at   | -6.17  | 3.01E-31 |
| LEPREL1            | 230813_at    | -6.16  | 3.09E-16 |

|                    |              |       |          |
|--------------------|--------------|-------|----------|
| C19orf26           | 1552354_at   | -6.15 | 8.70E-12 |
| PTAFR              | 211661_x_at  | -5.83 | 9.28E-28 |
| SLC7A8             | 216604_s_at  | -5.82 | 3.84E-19 |
| LINC00944          | 1560818_at   | -5.81 | 1.41E-27 |
| DKFZp434E1119      | 1565771_at   | -5.75 | 3.46E-21 |
| GPR4               | 211266_s_at  | -5.59 | 3.93E-19 |
| SEMA4G             | 219194_at    | -5.57 | 1.64E-28 |
| APOC2              | 206738_at    | -5.56 | 1.22E-21 |
| SLC8A3             | 1568859_a_at | -5.52 | 1.29E-27 |
| FANCD2             | 1568889_at   | -5.51 | 1.13E-26 |
| FAM170B-AS1        | 1563255_at   | -5.44 | 3.48E-21 |
| FUT6               | 210399_x_at  | -5.40 | 1.80E-27 |
| FGD2               | 1565752_at   | -5.38 | 2.68E-27 |
| CTD-2309H9.3       | 1569841_x_at | -5.37 | 1.51E-24 |
| CTD-2010I22.2      | 241945_at    | -5.36 | 7.30E-17 |
| OTTHUMG00000172987 | 1556994_at   | -5.34 | 3.21E-14 |
| IFT122             | 216678_at    | -5.31 | 6.04E-29 |
| CA9                | 205199_at    | -5.30 | 1.92E-16 |
| LOC286149          | 1556755_s_at | -5.30 | 2.34E-25 |
| MCM3AP             | 215582_x_at  | -5.19 | 1.64E-18 |
| LOC100652911       | 1556914_at   | -5.15 | 2.06E-21 |
| HNF1B              | 205313_at    | -5.15 | 1.61E-23 |
| LINC00642          | 1557656_at   | -5.12 | 4.39E-23 |
| TAF1L              | 1553011_at   | -5.12 | 8.53E-26 |
| TIRAP              | 1554091_a_at | -5.12 | 8.54E-20 |
| OTTHUMG00000175668 | 1569615_at   | -5.11 | 2.80E-32 |
| PLIN5              | 241368_at    | -5.09 | 8.80E-22 |
| LOC100505711       | 237779_at    | -5.09 | 7.07E-27 |
| CTC-774J1.1        | 1561107_at   | -5.06 | 7.82E-26 |
| OTTHUMG00000165624 | 220583_at    | -5.03 | 7.19E-17 |

P-values were calculated by Moderated *t*-tests with Benjamini-Hochberg multiple testing adjustment. All statistical tests were two-sided.

**Supplementary Table 4.** Clinical and histopathological information for the 46 high grade serous ovarian cancer specimens used in the survival analysis.

| <b>Characteristic</b>                                       | <b>No. (%)</b>                |                               |
|-------------------------------------------------------------|-------------------------------|-------------------------------|
|                                                             | <b>CAF-C</b><br>(n=23)        | <b>CAF-N</b><br>(n=23)        |
| Age at diagnosis, median (interquartile range), year        | 56 (49-70)                    | 58 (53.5-69.5)                |
| Disease grade<br>3                                          | 23 (100)                      | 23 (100)                      |
| Disease stage<br>3<br>4                                     | 22 (96)<br>1 (4)              | 20 (87)<br>3 (13)             |
| Overall survival, median (interquartile range), month       | 16 (13-32)                    | 33 (22.5-43.5)                |
| Progress-free survival, median (interquartile range), month | 5.5 (3.25-14)                 | 11 (5.5-15.5)                 |
| Debulking status<br>Optimal<br>Suboptimal<br>Unclear        | 15 (65%)<br>6 (26%)<br>2 (9%) | 18 (79%)<br>4 (17%)<br>1 (4%) |

**Supplementary Table 5.** Differentially expressed secretory ligands in cancer cells in group C compared with cancer cells in group N

**Upregulated ligands in cancer cells (Group C vs group N) (Fold change $\geq$ 2; Two-tailed Student *t*-test P<0.05)**

| <b>Gene symbol</b> | <b>Fold change</b> | <b>P-value</b> |
|--------------------|--------------------|----------------|
| VCAN               | 3.13               | 1.91E-02       |
| COL5A2             | 3.10               | 3.92E-02       |
| INHBA              | 2.76               | 1.91E-02       |
| IGF1               | 2.50               | 2.77E-02       |
| COL5A1             | 2.46               | 2.30E-02       |
| COL11A1            | 2.35               | 4.63E-02       |
| COL6A3             | 2.33               | 4.27E-02       |
| COL1A1             | 2.22               | 3.60E-02       |
| FN1                | 2.04               | 2.10E-02       |
| COL3A1             | 1.87               | 4.63E-02       |
| EFNB2              | 1.59               | 4.63E-02       |
| CXCL5              | 1.09               | 2.05E-02       |

P-values were calculated by Student *t*-tests. All statistical tests were two-sided.

**Supplementary Table 6.** Activated transcription factors in CAFs of patients with CAF-C gene signature

| <b>Gene symbol</b> | <b>P-value</b> |
|--------------------|----------------|
| HIF1A              | 2.00E-03       |
| TP53               | 5.50E-03       |
| STAT5A             | 8.70E-03       |
| STAT5B             | 8.70E-03       |
| STAT1              | 1.57E-02       |
| STAT4              | 2.04E-02       |
| SMAD3              | 2.70E-02       |
| ARNT               | 3.08E-02       |
| FLI1               | 3.57E-02       |
| CREBBP             | 4.55E-02       |
| EP300              | 4.55E-02       |
| STAT2              | 4.73E-02       |
| STAT6              | 4.73E-02       |

P-values were calculated by Fisher's exact test. All statistical tests were one-sided.



**Supplementary Table 7.** Activated signaling pathways in CAF-C when compared to CAF-N induced by differentially expressed ligands from the corresponding cancer cells

| <b>Pathway name</b>                  | <b>P-value</b> | <b>Number of KEGG pathway genes observed in the input data set</b> | <b>% of KEGG pathway genes observed in the input data set</b> |
|--------------------------------------|----------------|--------------------------------------------------------------------|---------------------------------------------------------------|
| PI3K-Akt signaling pathway           | < 1.00E-04     | 160                                                                | 46.9%                                                         |
| Thyroid hormone signaling pathway    | < 1.00E-04     | 58                                                                 | 52.7%                                                         |
| Smad signaling pathway               | 3.00E-04       | 35                                                                 | 47.9%                                                         |
| Toll-like receptor signaling pathway | 4.06E-02       | 39                                                                 | 38.2%                                                         |

P-values were calculated by Fisher's exact test. All statistical tests were one-sided.

**Supplementary Table 8.** Differentially expressed receptors in CAFs of patients with CAF-C gene signature when compared to patients with CAF-N gene signature

**Upregulated receptor in CAFs (Group C vs group N) (Fold change $\geq$ 1.5; Two-tailed Student *t*-test P $\leq$ 0.5)**

| Gene symbol | Fold change | P-value    |
|-------------|-------------|------------|
| CD47        | 9.73        | < 1.00E-04 |
| ITGB1       | 9.60        | < 1.00E-04 |
| EDNRA       | 8.21        | < 1.00E-04 |
| TGFBR2      | 6.86        | < 1.00E-04 |
| CD14        | 6.37        | < 1.00E-04 |
| FZD1        | 5.92        | < 1.00E-04 |
| PLAUR       | 5.67        | < 1.00E-04 |
| SDC1        | 5.62        | < 1.00E-04 |
| IL7R        | 5.29        | < 1.00E-04 |
| OSMR        | 5.25        | < 1.00E-04 |
| PLXNA1      | 5.24        | < 1.00E-04 |
| CD93        | 5.16        | < 1.00E-04 |
| CD74        | 4.83        | < 1.00E-04 |
| ITGB2       | 4.82        | < 1.00E-04 |
| TFRC        | 4.77        | < 1.00E-04 |
| IL1R1       | 4.64        | < 1.00E-04 |
| TNFRSF10B   | 4.60        | < 1.00E-04 |
| IL13RA1     | 4.32        | < 1.00E-04 |
| SDC4        | 4.30        | < 1.00E-04 |
| FZD7        | 4.29        | < 1.00E-04 |
| BMP2        | 4.24        | < 1.00E-04 |
| IL10RA      | 4.21        | < 1.00E-04 |
| TNFRSF12A   | 4.18        | < 1.00E-04 |
| PTPRC       | 4.17        | < 1.00E-04 |
| FZD2        | 4.03        | < 1.00E-04 |
| ROBO1       | 4.02        | < 1.00E-04 |
| ITGB5       | 4.02        | < 1.00E-04 |
| UNC5B       | 4.02        | < 1.00E-04 |
| F2RL1       | 4.00        | < 1.00E-04 |
| IGFBP3      | 3.98        | < 1.00E-04 |
| ATP6AP2     | 3.94        | < 1.00E-04 |
| CXCR4       | 3.93        | < 1.00E-04 |
| CD44        | 3.90        | < 1.00E-04 |
| ACVR1       | 3.74        | < 1.00E-04 |
| ITGAV       | 3.54        | < 1.00E-04 |

|          |      |            |
|----------|------|------------|
| TNFRSF1A | 3.52 | < 1.00E-04 |
| DAG1     | 3.48 | < 1.00E-04 |
| FGFR2    | 3.48 | < 1.00E-04 |
| ACKR3    | 3.48 | < 1.00E-04 |
| ITGB8    | 3.39 | < 1.00E-04 |
| NRP2     | 3.38 | < 1.00E-04 |
| ITGA11   | 3.30 | < 1.00E-04 |
| APP      | 3.29 | < 1.00E-04 |
| IGF2R    | 3.24 | < 1.00E-04 |
| NOTCH2   | 3.19 | < 1.00E-04 |
| NRP1     | 3.19 | < 1.00E-04 |
| AXL      | 3.15 | < 1.00E-04 |
| ITGA5    | 3.10 | < 1.00E-04 |
| IGF1R    | 3.08 | < 1.00E-04 |
| PDGFRA   | 3.05 | < 1.00E-04 |
| MARCO    | 3.03 | 2.41E-02   |
| FAS      | 2.98 | < 1.00E-04 |
| ERBB3    | 2.96 | 1.42E-02   |
| TGFBR1   | 2.95 | < 1.00E-04 |
| ITGA1    | 2.92 | < 1.00E-04 |
| IL6ST    | 2.89 | < 1.00E-04 |
| ACVR2A   | 2.87 | < 1.00E-04 |
| MET      | 2.83 | < 1.00E-04 |
| LRP1     | 2.78 | < 1.00E-04 |
| IFNGR1   | 2.76 | < 1.00E-04 |
| CSF2RB   | 2.65 | < 1.00E-04 |
| INSR     | 2.63 | < 1.00E-04 |
| ITGAM    | 2.51 | < 1.00E-04 |
| SORT1    | 2.50 | < 1.00E-04 |
| C5AR1    | 2.47 | < 1.00E-04 |
| BMPRI1B  | 2.40 | 1.00E-04   |
| IGFBP5   | 2.38 | 1.00E-04   |
| RYK      | 2.35 | < 1.00E-04 |
| EPHA2    | 2.34 | < 1.00E-04 |
| F2R      | 2.26 | < 1.00E-04 |
| IL10RB   | 2.23 | < 1.00E-04 |
| CX3CR1   | 2.22 | 1.98E-02   |
| ROR2     | 2.22 | < 1.00E-04 |
| IFNAR1   | 2.20 | < 1.00E-04 |
| CCR2     | 2.17 | 5.9E-04    |
| IL4R     | 2.15 | < 1.00E-04 |

|        |      |            |
|--------|------|------------|
| ITGA6  | 2.07 | < 1.00E-04 |
| PDGFRB | 2.05 | < 1.00E-04 |
| GHR    | 2.03 | 4.00E-04   |
| FZD5   | 2.02 | < 1.00E-04 |
| BMPR1A | 2.01 | 1.00E-04   |
| FGFR1  | 2.01 | < 1.00E-04 |

P-values were calculated by Student *t*-tests with Benjamini-Hochberg multiple testing adjustment. All statistical tests were two-sided.

**Supplementary Table 9.** Activated signaling pathways in CAF-C when compared to CAF-N that are mediated through upregulated receptors in CAFs

| Pathway name                         | P-value    | Number of KEGG pathway genes observed in the input data set | % of KEGG pathway genes observed in the input data set |
|--------------------------------------|------------|-------------------------------------------------------------|--------------------------------------------------------|
| PI3K-Akt signaling pathway           | < 1.00E-04 | 205                                                         | 60.1%                                                  |
| FoxO signaling pathway               | < 1.00E-04 | 69                                                          | 55.6%                                                  |
| Hippo signaling pathway              | < 1.00E-04 | 85                                                          | 56.3%                                                  |
| Adherens junction                    | < 1.00E-04 | 38                                                          | 55.1%                                                  |
| HIF-1 signaling pathway              | < 1.00E-04 | 55                                                          | 56.1%                                                  |
| Thyroid hormone signaling pathway    | < 1.00E-04 | 53                                                          | 48.2%                                                  |
| MAPK signaling pathway               | < 1.00E-04 | 120                                                         | 47.6%                                                  |
| Smad signaling pathway               | 3.00E-04   | 47                                                          | 64.4%                                                  |
| Chemokine signaling pathway          | 7.00E-04   | 88                                                          | 48.4%                                                  |
| Wnt signaling pathway                | 8.00E-04   | 61                                                          | 44.5%                                                  |
| Osteoclast differentiation           | 2.10E-03   | 55                                                          | 46.2%                                                  |
| ErbB signaling pathway               | 3.90E-03   | 45                                                          | 52.3%                                                  |
| Melanogenesis                        | 2.28E-02   | 44                                                          | 43.6%                                                  |
| Toll-like receptor signaling pathway | 4.06E-02   | 55                                                          | 53.9%                                                  |

P-values were calculated by Fisher's exact test. All statistical tests were one-sided.

**Supplementary Table 10.** Activated signaling pathways identified in robustness assessment of CCCEXplorer using randomly generated data sets.

| <b>Differentially expressed ligand-mediated crosstalk</b> |                   | <b>Differentially expressed receptor-mediated crosstalk</b> |                   |
|-----------------------------------------------------------|-------------------|-------------------------------------------------------------|-------------------|
| <b>Pathway name</b>                                       | <b>Appearance</b> | <b>Pathway name</b>                                         | <b>Appearance</b> |
| Rap1 signaling pathway                                    | 28 / 1,000 runs   | Thyroid hormone signaling pathway                           | 29 / 1,000 runs   |
| Jak-STAT signaling pathway                                | 21 / 1,000 runs   | Osteoclast differentiation                                  | 28 / 1,000 runs   |
| MAPK signaling pathway                                    | 19 / 1,000 runs   | Prolactin signaling pathway                                 | 28 / 1,000 runs   |
| Regulation of actin cytoskeleton                          | 16 / 1,000 runs   | Apoptosis                                                   | 25 / 1,000 runs   |
| Thyroid hormone signaling pathway                         | 15 / 1,000 runs   | FoxO signaling pathway                                      | 25 / 1,000 runs   |
| Axon guidance                                             | 14 / 1,000 runs   | MAPK signaling pathway                                      | 25 / 1,000 runs   |
| PI3K-Akt signaling pathway                                | 14 / 1,000 runs   | TNF signaling pathway                                       | 25 / 1,000 runs   |
| Focal adhesion                                            | 13 / 1,000 runs   | cGMP-PKG signaling pathway                                  | 23 / 1,000 runs   |
| Leukocyte transendothelial migration                      | 13 / 1,000 runs   | Neurotrophin signaling pathway                              | 23 / 1,000 runs   |
| Ras signaling pathway                                     | 12 / 1,000 runs   | PI3K-Akt signaling pathway                                  | 23 / 1,000 runs   |
| Osteoclast differentiation                                | 11 / 1,000 runs   | Axon guidance                                               | 21 / 1,000 runs   |
| HIF-1 signaling pathway                                   | 9 / 1,000 runs    | Jak-STAT signaling pathway                                  | 21 / 1,000 runs   |
| Smad signaling pathway                                    | 9 / 1,000 runs    | Leukocyte transendothelial migration                        | 21 / 1,000 runs   |
| Chemokine signaling pathway                               | 8 / 1,000 runs    | Melanogenesis                                               | 21 / 1,000 runs   |
| FoxO signaling pathway                                    | 8 / 1,000 runs    | Smad signaling pathway                                      | 21 / 1,000 runs   |
| Apoptosis                                                 | 7 / 1,000 runs    | Hippo signaling pathway                                     | 20 / 1,000 runs   |
| Melanogenesis                                             | 7 / 1,000 runs    | HIF-1 signaling pathway                                     | 19 / 1,000 runs   |
| Prolactin signaling pathway                               | 6 / 1,000 runs    | mTOR signaling pathway                                      | 19 / 1,000 runs   |
| Toll-like receptor signaling pathway                      | 6 / 1,000 runs    | Rap1 signaling pathway                                      | 19 / 1,000 runs   |
| Inflammatory mediator regulation of TRP channels          | 5 / 1,000 runs    | Ras signaling pathway                                       | 18 / 1,000 runs   |
| Endocytosis                                               | 4 / 1,000 runs    | Regulation of actin cytoskeleton                            | 18 / 1,000 runs   |
| ErbB signaling pathway                                    | 4 / 1,000 runs    | T cell receptor signaling pathway                           | 17 / 1,000 runs   |
| Hippo signaling pathway                                   | 4 / 1,000 runs    | Focal adhesion                                              | 14 / 1,000 runs   |
| mTOR signaling pathway                                    | 4 / 1,000 runs    | Wnt signaling pathway                                       | 13 / 1,000 runs   |
| Notch signaling pathway                                   | 4 / 1,000 runs    | Toll-like receptor signaling pathway                        | 12 / 1,000 runs   |
| Wnt signaling pathway                                     | 4 / 1,000 runs    | Adipocytokine signaling pathway                             | 11 / 1,000 runs   |
| Adherens junction                                         | 3 / 1,000 runs    | Chemokine signaling pathway                                 | 10 / 1,000 runs   |
| cGMP-PKG signaling pathway                                | 2 / 1,000 runs    | ErbB signaling pathway                                      | 10 / 1,000 runs   |
| GnRH signaling pathway                                    | 2 / 1,000 runs    | NOD-like receptor signaling pathway                         | 10 / 1,000 runs   |
| Natural killer cell mediated cytotoxicity                 | 2 / 1,000 runs    | Estrogen signaling pathway                                  | 9 / 1,000 runs    |
| NF-kappa B signaling pathway                              | 2 / 1,000 runs    | B cell receptor signaling pathway                           | 8 / 1,000 runs    |

|                                           |                |                                                           |                |
|-------------------------------------------|----------------|-----------------------------------------------------------|----------------|
| Oxytocin signaling pathway                | 2 / 1,000 runs | Endocytosis                                               | 8 / 1,000 runs |
| TNF signaling pathway                     | 2 / 1,000 runs | NF-kappa B signaling pathway                              | 8 / 1,000 runs |
| Adipocytokine signaling pathway           | 1 / 1,000 runs | Dorso-ventral axis formation                              | 7 / 1,000 runs |
| Aldosterone-regulated sodium reabsorption | 1 / 1,000 runs | GnRH signaling pathway                                    | 7 / 1,000 runs |
| Antigen processing and presentation       | 1 / 1,000 runs | Insulin secretion                                         | 7 / 1,000 runs |
| Calcium signaling pathway                 | 1 / 1,000 runs | Inflammatory mediator regulation of TRP channels          | 6 / 1,000 runs |
| Estrogen signaling pathway                | 1 / 1,000 runs | Notch signaling pathway                                   | 6 / 1,000 runs |
| Insulin signaling pathway                 | 1 / 1,000 runs | RIG-I-like receptor signaling pathway                     | 6 / 1,000 runs |
| Neurotrophin signaling pathway            | 1 / 1,000 runs | Adherens junction                                         | 5 / 1,000 runs |
| NOD-like receptor signaling pathway       | 1 / 1,000 runs | Gap junction                                              | 5 / 1,000 runs |
| RIG-I-like receptor signaling pathway     | 1 / 1,000 runs | Calcium signaling pathway                                 | 4 / 1,000 runs |
| T cell receptor signaling pathway         | 1 / 1,000 runs | Fc gamma R-mediated phagocytosis                          | 4 / 1,000 runs |
| Thyroid hormone synthesis                 | 1 / 1,000 runs | Natural killer cell mediated cytotoxicity                 | 4 / 1,000 runs |
|                                           |                | Thyroid hormone synthesis                                 | 4 / 1,000 runs |
|                                           |                | VEGF signaling pathway                                    | 4 / 1,000 runs |
|                                           |                | Aldosterone-regulated sodium reabsorption                 | 3 / 1,000 runs |
|                                           |                | Cytosolic DNA-sensing pathway                             | 3 / 1,000 runs |
|                                           |                | Insulin signaling pathway                                 | 3 / 1,000 runs |
|                                           |                | Oxytocin signaling pathway                                | 3 / 1,000 runs |
|                                           |                | Bile secretion                                            | 2 / 1,000 runs |
|                                           |                | Long-term depression                                      | 2 / 1,000 runs |
|                                           |                | Vascular smooth muscle contraction                        | 2 / 1,000 runs |
|                                           |                | Endocrine and other factor-regulated calcium reabsorption | 1 / 1,000 runs |
|                                           |                | Oocyte meiosis                                            | 1 / 1,000 runs |
|                                           |                | p53 signaling pathway                                     | 1 / 1,000 runs |

With randomized gene lists as input data sets, for differentially expressed ligand-mediated crosstalk, only 218 out of 1,000 runs identified at least one activated signaling pathway with  $P < 0.05$ . All pathways were predicted for less than 28 times out of 1,000 runs ( $P = 0.028$ ) and most of the pathways appeared less than 10 times out of 1,000 runs ( $P < 0.01$ ). The Smad signaling pathway appeared only in 9 of the 1,000 runs performed using randomly generated gene lists ( $P = 0.009$ ). For differentially expressed receptor-mediated crosstalk, 402 out of 1,000 runs identified at least one activated signaling pathway with  $P < 0.05$ . All pathways were predicted for less than 29 times out of 1,000 runs ( $P = 0.029$ ) and 30 out of 56 signaling pathways appeared less than 10 times out of 1,000 runs ( $P < 0.01$ ). The Smad signaling pathway appeared only in 21 of the 1,000 runs performed using randomly generated gene lists ( $P = 0.021$ ).

**Supplementary Table 11.** Activated signaling pathways identified in robustness assessment of CCCEXplorer by random candidate gene addition or deletion.

**Differentially expressed ligand-mediated crosstalk**

|                                      | Data set with random gene addition | Data set with random gene deletion |
|--------------------------------------|------------------------------------|------------------------------------|
| Pathway name                         | Appearance                         | Appearance                         |
| PI3K-Akt signaling pathway           | 1,000 / 1,000 runs                 | 989 / 1,000 runs                   |
| Thyroid hormone signaling pathway    | 1,000 / 1,000 runs                 | 980 / 1,000 runs                   |
| Smad signaling pathway               | 1,000 / 1,000 runs                 | 891 / 1,000 runs                   |
| Toll-like receptor signaling pathway | 481 / 1,000 runs                   | 380 / 1,000 runs                   |

For differentially expressed ligand-mediated crosstalk, adding randomly selected unimportant genes to all lists had minimal effect on the prediction of truly important pathways. Using data sets containing 10% of randomly selected genes as input data, 3 out of 4 (75%) pathways predicted using the original data set, including SMAD signaling pathways, were still predicted by the CCCEXplorer in all 1,000 runs with  $P < 0.05$ . Similarly, 3 out of 4 (75%) signaling pathways predicted using the original data set, including SMAD signaling pathways, were still predicted by the CCCEXplorer in more than 890 out of 1,000 runs with  $P < 0.05$  using input data with 10% of randomly selected genes deleted.

**Differentially expressed receptor-mediated crosstalk**

|                                      | Data set with random gene addition | Data set with random gene deletion |
|--------------------------------------|------------------------------------|------------------------------------|
| Pathway name                         | Appearance                         | Appearance                         |
| FoxO signaling pathway               | 1,000 / 1,000 runs                 | 1,000 / 1,000 runs                 |
| Hippo signaling pathway              | 1,000 / 1,000 runs                 | 1,000 / 1,000 runs                 |
| HIF-1 signaling pathway              | 1,000 / 1,000 runs                 | 1,000 / 1,000 runs                 |
| Chemokine signaling pathway          | 1,000 / 1,000 runs                 | 996 / 1,000 runs                   |
| Smad signaling pathway               | 1,000 / 1,000 runs                 | 995 / 1,000 runs                   |
| PI3K-Akt signaling pathway           | 1,000 / 1,000 runs                 | 993 / 1,000 runs                   |
| MAPK signaling pathway               | 1,000 / 1,000 runs                 | 993 / 1,000 runs                   |
| Wnt signaling pathway                | 1,000 / 1,000 runs                 | 990 / 1,000 runs                   |
| Adherens junction                    | 1,000 / 1,000 runs                 | 989 / 1,000 runs                   |
| Osteoclast differentiation           | 1,000 / 1,000 runs                 | 989 / 1,000 runs                   |
| Thyroid hormone signaling pathway    | 1,000 / 1,000 runs                 | 988 / 1,000 runs                   |
| ErbB signaling pathway               | 1,000 / 1,000 runs                 | 874 / 1,000 runs                   |
| Melanogenesis                        | 783 / 1,000 runs                   | 720 / 1,000 runs                   |
| Toll-like receptor signaling pathway | 490 / 1,000 runs                   | 478 / 1,000 runs                   |

For differentially expressed receptor-mediated crosstalk, using data sets containing 10% of randomly selected genes as input data, 12 out of 14 (85.7%) pathways predicted using the original data set, including SMAD signaling pathways, were still predicted by the CCCEXplorer in all 1,000 runs with  $P < 0.05$ . Similarly, 12 out of 14 (85.7%) pathways predicted using the original data set, including SMAD signaling pathways, were still predicted by the CCCEXplorer in more than 870 out of 1,000 runs with  $P < 0.05$  using input data with 10% of randomly selected genes deleted.



**Supplementary Table 12.** List of Smad-regulated genes included in unsupervised clustering analysis of CAF samples

| Gene symbol |
|-------------|-------------|-------------|-------------|-------------|
| ABI2        | COL10A1     | GZMA        | LY6A        | SMAD1       |
| ACTA2       | COL1A1      | GZMB        | MBOAT2      | SMAD2       |
| ACTA2       | COL2A1      | HBEGF       | MMP13       | SMAD3       |
| ALB         | COL3A1      | HEY1        | MMP2        | SMAD4       |
| Alp         | CRP         | HNF4A       | MMP9        | SMAD5       |
| AREG        | CTGF        | HP          | MSTN        | SMAD7       |
| ASPN        | CTNNB1      | IFNB1       | MUC4        | SMURF2      |
| BCL2        | CXCL10      | IFNG        | MYC         | SNAI1       |
| BCL2L11     | CXCL3       | IL13        | MYF5        | SNAI2       |
| BECN1       | CYP11A1     | IL15        | NANOG       | SOX17A      |
| BGLAP       | CYP19A1     | IL1B        | NET1        | TBX21       |
| BGN         | DEPTOR      | IL2         | NODAL       | TERT        |
| BMP2        | DOCK4       | IL23A       | NOS2        | TGFA        |
| BMP6        | DUSP4       | IL4         | NOV         | TGFB1       |
| CBLB        | EGR1        | IL5         | NR5A1       | TGFB3       |
| CCL2        | ELN         | IL6         | ORM1        | TGFBR1      |
| CCL3L3      | EREG        | IL6R        | PARGC1A     | TGFBR2      |
| CCL4        | ESR1        | IL9         | PCNA        | THBS1       |
| CCND1       | ESR2        | INHA        | PITX2       | TIMP3       |
| CCND2       | FLT1        | INHBA       | PPARD       | TNC         |
| CCNE1       | FN1         | ITGB1       | PTGS2       | TNF         |
| CDH1        | FNDC5       | JAG1        | RAC1        | TPM1        |
| CDH2        | FOS         | JAM2        | RNA         | TPM2        |
| CDH5        | FOXP3       | JUN         | RORC        | TPM3        |
| CDK4        | FPR2        | JUNB        | RUNX2       | VEGFA       |
| CDKN1A      | FSHB        | JUND        | S1PR1       | VEGFC       |
| CDKN2A      | FSTL3       | KLK3        | S1PR4       | VIM         |
| CDKN2B      | GAST        | LEFTY2      | SELE        | WNT8        |
| CDX2        | GATA3       | LGALS9B     | SERPINE1    | XIAP        |
| CHRD        | GLI1        | LPAR1       | SKIL        |             |
| CIITA       | GLI2        | LUM         | SLC51B      |             |

**Supplementary Table 13.** Drug candidates in the two largest repositioned drug clusters after false positive filtering by affinity propagation clustering

| First drug cluster |                    | Second drug cluster |              |
|--------------------|--------------------|---------------------|--------------|
| Drug ID            | Drug Name          | Drug ID             | Drug Name    |
| BRD-K27316855      | Calcitriol         | BRD-A16444946       | Acarbose     |
| BRD-K16336526      | Capsaicin          | BRD-A22032524       | Amlodipine   |
| BRD-K16508793      | Diazepam           | BRD-K67017579       | Cilostazol   |
| BRD-K45330754      | Diethylstilbestrol | BRD-K45252063       | Clofibrate   |
| BRD-A54845972      | Dihydroergotamine  | BRD-K40758068       | Efavirenz    |
| BRD-K38305202      | Domperidone        | BRD-K66296774       | Fluvastatin  |
| BRD-K18910433      | Estradiol          | BRD-A95869247       | Indapamide   |
| BRD-A97104540      | Fenoterol          | BRD-A49172652       | Lansoprazole |
| BRD-K98769987      | Flumazenil         | BRD-A11170096       | Pravastatin  |
| BRD-K32830106      | Guanfacine         | BRD-K89348303       | Ramipril     |
| BRD-A07440155      | Labetalol          | BRD-K82846253       | Repaglinide  |
| BRD-K52662033      | Lidocaine          | BRD-K82941592       | Rosuvastatin |
| BRD-K89152108      | Liothyronine       | BRD-A81772229       | Simvastatin  |
| BRD-K88871508      | Lisuride           | BRD-K19416115       | Sitagliptin  |
| BRD-K77641333      | Naphazoline        |                     |              |
| BRD-K76810206      | Nicergoline        |                     |              |
| BRD-K05395900      | Nicotine           |                     |              |
| BRD-K96354014      | Nifedipine         |                     |              |
| BRD-A91555231      | Norepinephrine     |                     |              |
| BRD-A97701745      | Pindolol           |                     |              |
| BRD-K95921201      | Reserpine          |                     |              |
| BRD-A50157456      | Terbutaline        |                     |              |
| BRD-A55393291      | Testosterone       |                     |              |
| BRD-A43974575      | Tranlycypromine    |                     |              |
